# Supplementary material for: Optimization of a Novel Mandelamide-Derived Pyrrolopyrimidine Series of PERK Inhibitors
Source: MDPI journal article supplement (doi:10.3390/pharmaceutics14102233), 2022-10-19
Supplement: s1 [file s1]

Article

# Optimization of a Novel Mandelamide-Derived Pyrrolopyrimidine Series of PERK Inhibitors

Michael E. Stokes <sup>1,\*,†</sup>, Matthew D. Surman <sup>2,\*,†</sup>, Veronica Calvo <sup>1</sup>, David Surguladze <sup>1</sup>, An-Hu Li <sup>1</sup>, Jennifer Gasparek <sup>3</sup>, Matthew Betzenhauser <sup>3</sup>, Guangyu Zhu <sup>3</sup>, Hongwen Du <sup>4</sup>, Alan C. Rigby <sup>1</sup> and Mark J. Mulvihill <sup>1</sup>

<sup>1</sup> HiberCell Inc., 619 West 54th Street, New York, NY 10019, USA

<sup>2</sup> Curia, 26 Corporate Circle, Albany, NY 12203, USA

<sup>3</sup> Curia, 1001 Main Street, Buffalo, NY 14203, USA

<sup>4</sup> Pharmaron Beijing Co., Ltd., No. 6, TaiHe Road, BDA, Beijing 100176, China

\* Correspondence: mstokes@hibercell.com (M.E.S.); matthew.surman@curiaglobal.com (M.D.S.)

† These authors contributed equally to this work.

## Contents

|                               |    |
|-------------------------------|----|
| 1. Chemistry-----             | 2  |
| 2. Crystallography-----       | 42 |
| 3. Supplemental Data-----     | 43 |
| 4. Materials and Methods----- | 49 |
| 5. References -----           | 56 |

## 1. Chemistry

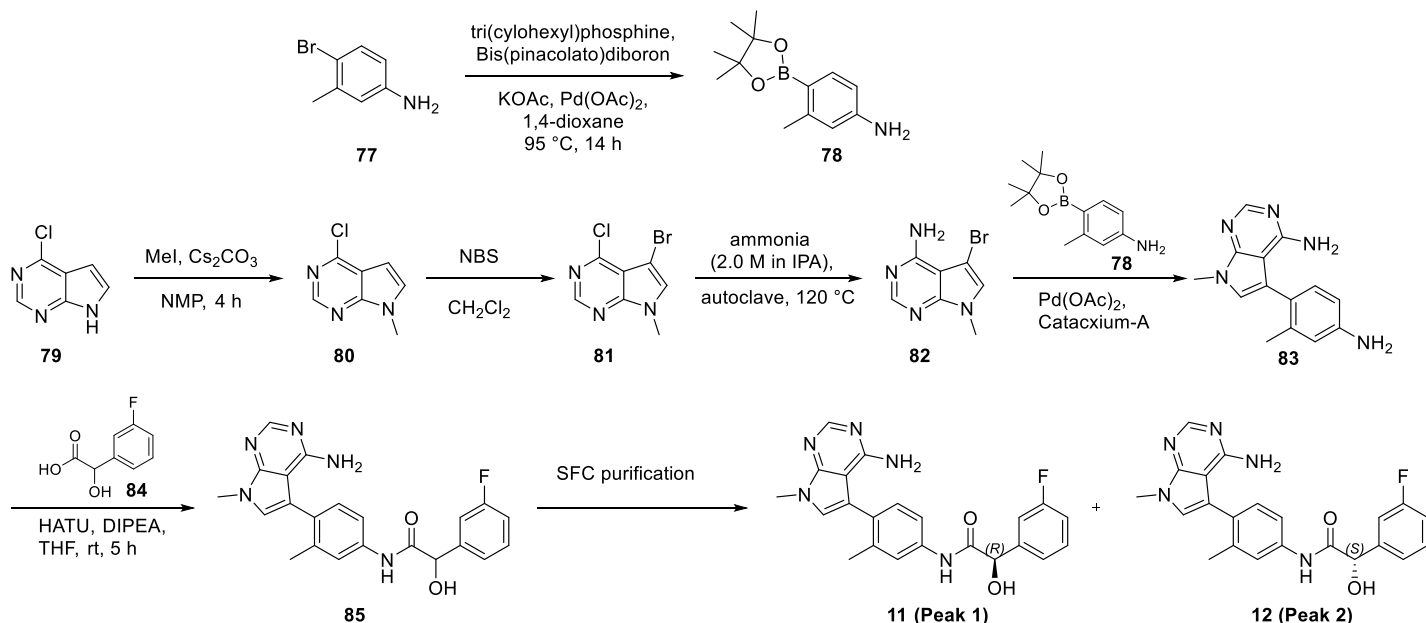

**Scheme S1. Synthesis of (*R*)-*N*-(4-(4-amino-7-methyl-7*H*-pyrrolo[2,3-*d*]pyrimidin-5-yl)-3-methylphenyl)-2-(3-fluorophenyl)-2-hydroxyacetamide (11) and (*S*)-*N*-(4-(4-amino-7-methyl-7*H*-pyrrolo[2,3-*d*]pyrimidin-5-yl)-3-methylphenyl)-2-(3-fluorophenyl)-2-hydroxyacetamide (12).**

### 3-Methyl-4-(4,4,5,5-tetramethyl-1,3,2-dioxaborolan-2-yl)aniline (78)

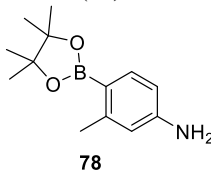

To a stirred solution of tricyclohexylphosphine (7.18 g, 25.7 mmol) in 1,4-dioxane (1.2 L) under argon atmosphere were added sequentially bis(pinacolato)diboron (89.62 g, 352.9 mmol), potassium acetate (62.98 g, 641.7 mmol) and 4-bromo-3-methylaniline (77, 59.69 g, 320.8 mmol). The reaction mixture was purged with argon gas for 10 min, treated with palladium (II) acetate (5.77 g, 25.7 mmol) and again purged with argon gas for an additional 10 min. The reaction mixture was heated with stirring at 95 °C under an argon atmosphere for overnight. After this time, the reaction mixture was allowed to cool to room temperature, passed through a bed of diatomaceous earth and washed with methyl *tert*-butyl ether (4 × 250 mL). The filtrate was washed with water (2 × 500 mL) and brine solution (2 × 250 mL). The organic layer was separated, dried over anhydrous sodium sulfate and concentrated under reduced pressure. The crude material was purified by column chromatography (silica gel (100-200 mesh size), 10% ethyl acetate/hexanes as an eluent) to afford 3-methyl-4-(4,4,5,5-tetramethyl-1,3,2-dioxaborolan-2-yl)aniline (78, 44.80 g, 60%) as a pale brown solid. <sup>1</sup>H NMR (400 MHz, DMSO-*d*<sub>6</sub>) δ 7.32–7.30 (d, *J* = 8.0 Hz, 1H), 6.31 (s, 1H), 6.29 (s, 1H), 5.34 (s, 2H), 2.29 (s, 3H), 1.23 (s, 12H). ESI (*m/z*): 234 [C<sub>13</sub>H<sub>20</sub>BNO<sub>2</sub> + H]<sup>+</sup>.

### 4-Chloro-7-methyl-7*H*-pyrrolo[2,3-*d*]pyrimidine (80)

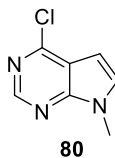

To a stirred solution of 4-chloro-7*H*-pyrrolo[2,3-*d*]pyrimidine (79, 5.00 g, 32.5 mmol) in *N*-methyl-2-pyrrolidone (30 mL) was added cesium carbonate (21.2 g, 65.1 mmol) at 15 °C. After 15 min, methyl iodide (2.32 g, 1.0 mL, 16.4 mmol) was added dropwise at 15 °C, and the resulting mixture was stirred under argon atmosphere at ambient temperature for 4 h. After this time, the reaction mixture was poured into ice cold water (60 mL) and stirred for 30 min. The solid was precipitated out, isolated by filtration, washed with water (30 mL) and dried under vacuum to afford 4-chloro-7-methyl-7*H*-pyrrolo[2,3-*d*]pyrimidine (80, 4.4 g, 80%) as an off white solid. ESI (*m/z*): 168 [C<sub>7</sub>H<sub>6</sub>ClN<sub>3</sub> + H]<sup>+</sup>.

#### 5-Bromo-4-chloro-7-methyl-7H-pyrrolo[2,3-d]pyrimidine (81)

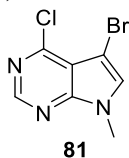

To a stirred solution of 4-chloro-7-methyl-7H-pyrrolo[2,3-d]pyrimidine (**80**, 4.41 g, 26.3 mmol) in methylene chloride (40 mL) was added *N*-bromosuccinimide (5.14 g, 28.9 mmol) portion-wise at 5 °C. The resulting mixture was warmed to ambient temperature and stirred for 3 h. After this time, the reaction mixture was filtered, solid was washed with water (40 mL) and dried to afford 5-bromo-4-chloro-7-methyl-7H-pyrrolo[2,3-d]pyrimidine (**81**, 5.1 g, 78%) as an off white solid. ESI (*m/z*): 246, 249 [C<sub>7</sub>H<sub>5</sub>BrClN<sub>3</sub> + H]<sup>+</sup>.

#### 5-Bromo-7-methyl-7H-pyrrolo[2,3-d]pyrimidin-4-amine (82)

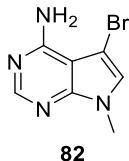

In a 100 mL autoclave, 5-bromo-4-chloro-7-methyl-7H-pyrrolo[2,3-d]pyrimidine (**81**, 3.0 g, 12.19 mmol) in 25% aqueous ammonia (25 mL) was heated with stirring at 120 °C for 16 h. After this time, the reaction mixture was allowed to cool to room temperature. The resulting solid was filtrated, washed with water (25 mL) followed by methanol (5 mL) and dried to afford 5-bromo-7-methyl-7H-pyrrolo[2,3-d]pyrimidin-4-amine (**82**, 2.1 g, 77%) as an off white solid. ESI (*m/z*) 227, 229 [C<sub>7</sub>H<sub>7</sub>BrN<sub>4</sub> + H]<sup>+</sup>.

#### 5-(4-Amino-2-methylphenyl)-7-methyl-7H-pyrrolo[2,3-d]pyrimidin-4-amine (83)

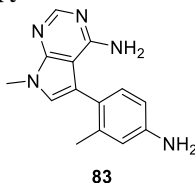

To a mixture of 2-methyl tetrahydrofuran (15 mL) and water (5 mL), 5-bromo-7-methyl-7H-pyrrolo[2,3-d]pyrimidin-4-amine (**82**, 2.00 g, 8.81 mmol), 3-methyl-4-(4,4,5,5-tetramethyl-1,3,2-dioxaborolan-2-yl)aniline (**78**, 2.66 g, 11.5 mmol) were added. The resulting reaction mixture was purged with argon for 5 min. followed by addition of sodium bicarbonate (1.48 g, 17.6 mmol.), Catacxium-A (0.19 g, 0.52 mmol) and palladium(II) acetate (0.058 g, 0.26 mmol). After addition was complete, the resulting reaction mixture was purged again with argon for 10 min. and then heated at 100 °C for 16 h. After this time, the mixture was allowed to cool to room temperature, passed through a bed of diatomaceous earth and washed with ethyl acetate (2 × 50 mL). The filtrate was washed with water (20 mL) and brine solution (20 mL). The organic layer was dried over anhydrous sodium sulfate and concentrated under reduced pressure. Crude product was purified by reverse phase column chromatography (40% ACN: Water) to afford 5-(4-amino-2-methylphenyl)-7-methyl-7H-pyrrolo[2,3-d]pyrimidin-4-amine (**83**, 0.8 g, 36%) as an off white solid. ESI (*m/z*): 254 [C<sub>14</sub>H<sub>15</sub>N<sub>5</sub> + H]<sup>+</sup>.

#### *N*-(4-(4-Amino-7-methyl-7H-pyrrolo[2,3-d]pyrimidin-5-yl)-3-methylphenyl)-2-(3-fluorophenyl)-2-hydroxyacetamide (85)

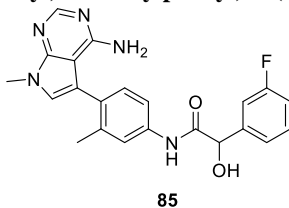

To a solution of 5-(4-amino-2-methylphenyl)-7-methyl-7H-pyrrolo[2,3-d]pyrimidin-4-amine (**83**, 800 mg, 3.16 mmol), 2-(3-fluorophenyl)-2-hydroxyacetic acid (**84**, 591 mg, 3.47 mmol) in tetrahydrofuran (5 mL) were added *N,N*-diisopropylethylamine (0.70 mL, 3.8 mmol) followed by 1-[bis(dimethylamino)methylene]-1*H*-1,2,3-triazolo[4,5-*b*]pyridinium 3-oxide hexafluorophosphate (HATU) (1.44 g, 3.79 mmol) at room temperature, and the reaction mixture was stirred for 12 h. After this time, the reaction mixture was diluted with methylene chloride (20 mL) and washed with water (4 × 10 mL) followed by brine solution (10 mL). The organic layer was separated, dried over anhydrous sodium sulfate, and concentrated under reduced pressure. The crude product was purified by combi flash column chromatography (using 2% methanol/methylene chloride as an eluent) to afford *N*-(4-(4-amino-7-methyl-7H-pyrrolo[2,3-d]pyrimidin-5-yl)-3-methylphenyl)-2-(3-fluorophenyl)-2-hydroxyacetamide (**85**, 900 mg, 70%) as a mixture of enantiomers as an off white solid: <sup>1</sup>H NMR (400 MHz, DMSO-*d*<sub>6</sub>): δ 10.00 (s, 1H), 8.17 (s, 1H), 7.69 (s, 1H), 7.62 (d, *J* = 8.80 Hz, 1H), 7.42–7.34 (m, 3H), 7.19–7.14 (m, 3H), 5.17 (d, *J* = 4.40 Hz, 2H), 5.75 (s, 3H), 2.16 (s, 3H); ESI (*m/z*): 406 [C<sub>22</sub>H<sub>20</sub>FN<sub>5</sub>O<sub>2</sub> + H]<sup>+</sup>.

(*R*)-*N*-(4-(4-Amino-7-methyl-7H-pyrrolo[2,3-d]pyrimidin-5-yl)-3-methylphenyl)-2-(3-fluorophenyl)-2-hydroxyacetamide (**11**) and (*S*)-*N*-(4-(4-amino-7-methyl-7H-pyrrolo[2,3-d]pyrimidin-5-yl)-3-methylphenyl)-2-(3-fluorophenyl)-2-hydroxyacetamide (**12**)

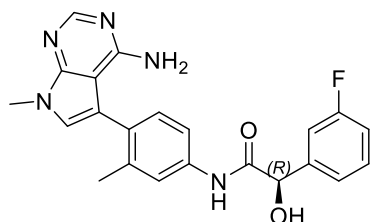

**11 (Peak 1)**

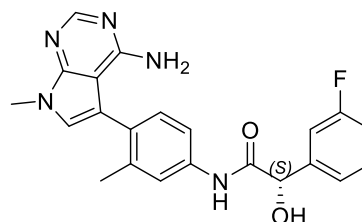

**12 (Peak 2)**

The mixture of enantiomers was purified by chiral supercritical fluid chromatography (SFC) (Chiralcel OX-H column, 30% methanol in CO<sub>2</sub>, 40 °C temperature).

**11/Peak 1** (52 mg) as an off white solid; <sup>1</sup>H NMR (400 MHz, DMSO-*d*<sub>6</sub>) 9.98 (s, 1H), 8.13 (s, 1H), 7.68 (d, *J* = 1.60 Hz, 1H), 7.61 (dd, *J* = 1.60, 8.20 Hz, 1H), 7.42–7.34 (m, 3H), 7.17–7.14 (m, 3H), 6.59 (d, *J* = 4.80 Hz, 1H), 5.58 (br s, 2H), 5.16 (d, *J* = 4.80 Hz, 1H), 3.73 (s, 3H), 2.15 (s, 3H); HPLC (Method C) 99.3% (AUC), *t*<sub>R</sub> = 6.46 min; Chiral SFC (Chiralcel OX-H, Method B) 99.2% (AUC), *t*<sub>R</sub> = 5.89 min; ESI (*m/z*): 406 [C<sub>22</sub>H<sub>20</sub>FN<sub>5</sub>O<sub>2</sub> + H]<sup>+</sup>.

**12/Peak 2** (35 mg) as a light-yellow solid; <sup>1</sup>H NMR (400 MHz, DMSO-*d*<sub>6</sub>) δ 9.98 (s, 1H), 8.12 (s, 1H), 7.68 (s, 1H), 7.61 (d, *J* = 8.00 Hz, 1H), 7.42–7.34 (m, 3H), 7.17–7.13 (m, 3H), 6.59 (d, *J* = 4.80 Hz, 1H), 5.58 (br s, 2H), 5.16 (d, *J* = 4.80 Hz, 1H), 3.73 (s, 3H), 2.15 (s, 3H); HPLC (Method A) 99.3% (AUC), *t*<sub>R</sub> = 6.44 min; Chiral SFC (Chiralcel OX-H, Method A) 99.3% (AUC), *t*<sub>R</sub> = 7.63 min. ESI (*m/z*): 406 [C<sub>22</sub>H<sub>20</sub>FN<sub>5</sub>O<sub>2</sub> + H]<sup>+</sup>.

The following compounds were prepared by following the same procedure for synthesizing **11** and **12**:

**(R)-N-(4-(4-Amino-7-methyl-7H-pyrrolo[2,3-d]pyrimidin-5-yl)-3-methylphenyl)-2-hydroxy-2-phenylacetamide (13)**

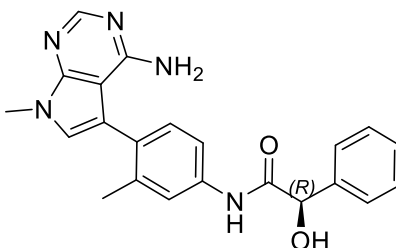

**13**

<sup>1</sup>H NMR (400 MHz, DMSO-*d*<sub>6</sub>) δ 9.95 (s, 1H), 8.12 (s, 1H), 7.69 (d, *J* = 1.60 Hz, 1H), 7.62 (dd, *J* = 2.40, 8.20 Hz, 1H), 7.53 (d, *J* = 7.60 Hz, 2H), 7.38–7.30 (m, 3H), 7.15 (d, *J* = 8.40 Hz, 1H), 7.13 (s, 1H), 6.45 (d, *J* = 4.80 Hz, 1H), 5.76 (s, 2H), 5.12 (d, *J* = 4.80 Hz, 1H), 3.73 (s, 3H), 2.15 (s, 3H); ESI (*m/z*): 388 [C<sub>22</sub>H<sub>21</sub>N<sub>5</sub>O<sub>2</sub> + H]<sup>+</sup>; HPLC (Method C) > 99% (AUC), *t*<sub>R</sub> = 6.37 min; Chiral SFC (Chiralcel OX-H, Method B) 98.5% (AUC), *t*<sub>R</sub> = 5.93 min.

**N-(4-(4-Amino-7-methyl-7H-pyrrolo[2,3-d]pyrimidin-5-yl)-3-methylphenyl)-2-phenylacetamide (14)**

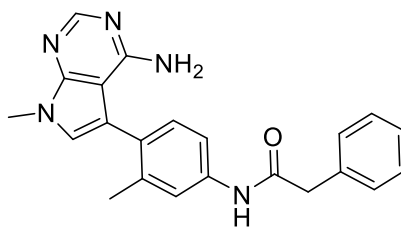

**14**

<sup>1</sup>H NMR (400 MHz, DMSO-*d*<sub>6</sub>) δ 10.23 (s, 1H), 8.13 (s, 1H), 7.59 (d, *J* = 1.60 Hz, 1H), 7.52 (dd, *J* = 1.60, 8.20 Hz, 1H), 7.37–7.32 (m, 4H), 7.28–7.23 (m, 1H), 7.16 (d, *J* = 8.00 Hz, 1H), 7.13 (s, 1H), 5.62 (brs, 2H), 3.73 (s, 3H), 3.65 (s, 2H), 2.16 (s, 3H); ESI (*m/z*): 372 [C<sub>22</sub>H<sub>21</sub>N<sub>5</sub>O + H]<sup>+</sup>; HPLC (Method C) >99.4% (AUC), *t*<sub>R</sub> = 6.51 min.

**N-(4-(4-Amino-7-methyl-7H-pyrrolo[2,3-d]pyrimidin-5-yl)-3-methylphenyl)-3-phenylpropanamide (15)**

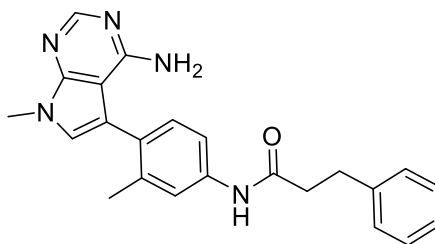

**15**

$^1\text{H}$  NMR (400 MHz,  $\text{DMSO-}d_6$ )  $\delta$  9.99 (brs, 1H), 8.12 (s, 1H), 7.56 (s, 1H), 7.48 (dd,  $J$  = 11.20, 11.60 Hz, 1H), 7.35–7.21 (m, 4H), 7.11–7.18 (m, 3H), 5.73 (brs, 2H), 3.72 (s, 3H), 2.94–2.91 (m, 2H), 2.64–2.60 (m, 2H), 2.20 (s, 3H); ESI ( $m/z$ ): 386 [ $\text{C}_{23}\text{H}_{23}\text{N}_5\text{O} + \text{H}$ ] $^+$ ; HPLC (Method B) 95.7% (AUC),  $t_R$  = 8.40 min.

***N*-(4-(4-Amino-7-methyl-7*H*-pyrrolo[2,3-*d*]pyrimidin-5-yl)-3-methylphenyl)benzamide (16)**

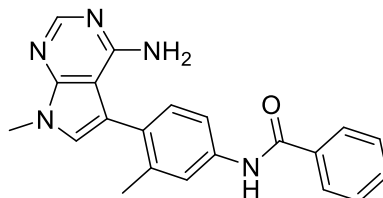

**16**

$^1\text{H}$  NMR (400 MHz,  $\text{DMSO-}d_6$ )  $\delta$  10.3 (s, 1H), 8.14 (s, 1H), 7.97 (d,  $J$  = 7.20 Hz, 2H), 7.79 (s, 1H), 7.72 (dd,  $J$  = 1.60, 8.20 Hz, 1H), 7.61–7.53 (m, 3H), 7.23 (d,  $J$  = 8.00 Hz, 1H), 7.17 (s, 1H), 5.76 (brs, 2H), 3.75 (s, 3H), 2.21 (s, 3H); ESI ( $m/z$ ): 358 [ $\text{C}_{21}\text{H}_{19}\text{N}_5\text{O} + \text{H}$ ] $^+$ ; HPLC (Method B) >99 % (AUC),  $t_R$  = 6.40 min.

***N*-(4-(4-Amino-7-methyl-7*H*-pyrrolo[2,3-*d*]pyrimidin-5-yl)-3-methylphenyl)-2,2-difluoro-2-phenylacetamide (17)**

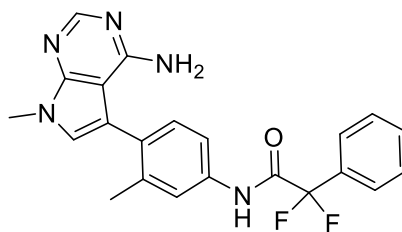

**17**

$^1\text{H}$  NMR (400 MHz,  $\text{DMSO-}d_6$ )  $\delta$  10.80 (s, 1H), 8.13 (s, 1H), 7.71–7.69 (m, 3H), 7.65–7.57 (m, 4H), 7.22 (d,  $J$  = 8.0 Hz, 1H), 7.15 (s, 1H), 5.79–5.53 (m, 2H), 3.73 (s, 3H), 2.18 (s, 3H). ESI ( $m/z$ ): 408 [ $\text{C}_{22}\text{H}_{19}\text{F}_2\text{N}_5\text{O} + \text{H}$ ] $^+$ ; HPLC (Method B) 97.6% (AUC),  $t_R$  = 7.46 min.

***(R)*-N-(4-(4-Amino-7-methyl-7*H*-pyrrolo[2,3-*d*]pyrimidin-5-yl)-3-methylphenyl)-2-methoxy-2-phenylacetamide (21)**

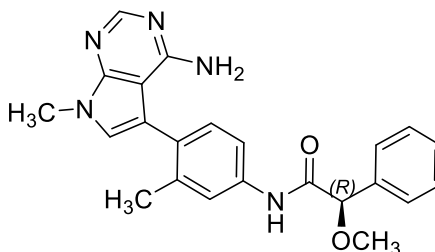

**21**

$^1\text{H}$  NMR (400 MHz,  $\text{DMSO-}d_6$ )  $\delta$  10.08 (s, 1H), 8.13 (s, 1H), 7.67 (s, 1H), 7.60 (dd,  $J$  = 4.00, 8.00 Hz, 1H), 7.50 (d,  $J$  = 8.00 Hz, 2H), 7.41–7.32 (m, 3H), 7.17 (s, 1H), 7.14 (s, 1H), 5.75 (s, 2H), 4.85 (s, 1H), 3.73 (s, 3H), 3.38 (s, 3H), 2.15 (s, 3H); ESI ( $m/z$ ): 402 [ $\text{C}_{23}\text{H}_{23}\text{N}_5\text{O}_2 + \text{H}$ ] $^+$ ; HPLC (Method C) >99% (AUC),  $t_R$  = 6.57 min.

***N*-(4-(4-Amino-7-methyl-7*H*-pyrrolo[2,3-*d*]pyrimidin-5-yl)-3-methylphenyl)-2-hydroxy-2-phenylpropanamide (22)**

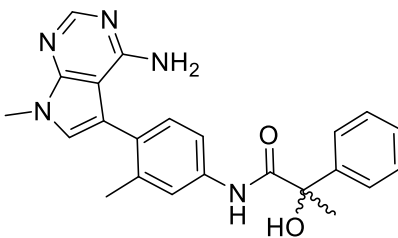

**22**

<sup>1</sup>H NMR (400 MHz, DMSO-*d*<sub>6</sub>) δ 9.73 (s, 1H), 8.12 (s, 1H), 7.73 (s, 1H), 7.64–7.61 (m, 3H), 7.36 (m, 2H), 7.29–7.25 (m, 1H), 7.15–7.12 (m, 2H), 6.49 (s, 1H), 5.68 (brs, 2H), 3.73 (s, 3H), 2.14 (s, 3H), 1.74 (s, 3H); ESI (*m/z*): 402 [C<sub>23</sub>H<sub>23</sub>N<sub>5</sub>O<sub>2</sub> + H]<sup>+</sup>; HPLC (Method B) >99% (AUC), *t*<sub>R</sub> = 7.22 min.

**(*R*)-2-Amino-*N*-(4-(4-Amino-7-methyl-7*H*-pyrrolo[2,3-*d*]pyrimidin-5-yl)-3-methylphenyl)-2-phenylacetamide (23)**

The Boc group was then removed using trifluoroacetic acid in methylene chloride to give **23**.

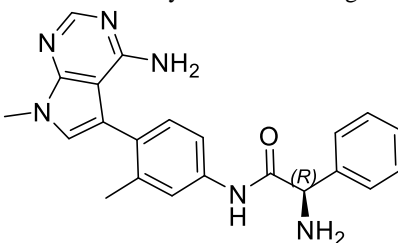

**23**

<sup>1</sup>H NMR (400 MHz, DMSO-*d*<sub>6</sub>) δ 10.07 (brs, 1H), 8.11 (s, 1H), 7.59–7.54 (m, 4H), 7.36–7.32 (m, 2H), 7.28–7.24 (m, 1H), 7.15 (d, *J* = 8.00 Hz, 1H), 7.12 (s, 1H), 5.69 (brs, 2H), 4.55 (s, 1H), 3.72 (s, 3H), 2.15 (s, 3H); ESI (*m/z*): 387 [C<sub>22</sub>H<sub>22</sub>N<sub>6</sub>O + H]<sup>+</sup>; HPLC (Method C) >99% (AUC), *t*<sub>R</sub> = 5.99 min.

**(*R*)-*N*-(4-(4-Amino-2,7-dimethyl-7*H*-pyrrolo[2,3-*d*]pyrimidin-5-yl)-3-methylphenyl)-2-(3-fluorophenyl)-2-hydroxyacetamide (24)**

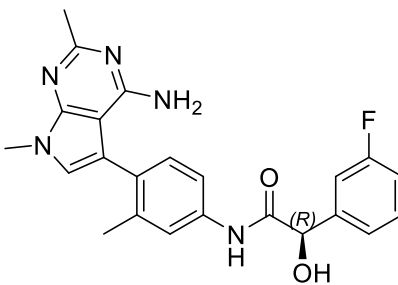

**24**

<sup>1</sup>H NMR (400 MHz, DMSO-*d*<sub>6</sub>) δ 9.95 (s, 1H), 7.66 (s, 1H), 7.59 (d, *J* = 8.4 Hz, 1H), 7.41–7.33 (m, 3H), 7.14 (d, *J* = 8.4 Hz, 2H), 7.01 (s, 1H), 6.57 (d, *J* = 4.8 Hz, 1H), 5.54 (brs, 2H), 5.15 (d, *J* = 4.8 Hz, 1H), 3.68 (s, 3H), 2.39 (s, 3H), 2.14 (s, 3H); ESI (*m/z*): 420 [C<sub>23</sub>H<sub>22</sub>FN<sub>5</sub>O<sub>2</sub> + H]<sup>+</sup>; HPLC (Method C) 94.6% (AUC), *t*<sub>R</sub> = 6.52 min; Chiral SFC (Chiralcel OX-H, Method B) >99% (AUC), *t*<sub>R</sub> = 5.26 min.

**(*R*)-*N*-(4-(4-Amino-2,7-dimethyl-7*H*-pyrrolo[2,3-*d*]pyrimidin-5-yl)-3-methylphenyl)-2-(2-fluorophenyl)-2-hydroxyacetamide (25)**

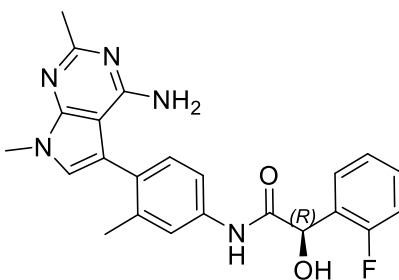

**25**

$^1\text{H}$  NMR (400 MHz,  $\text{DMSO}-d_6$ )  $\delta$  9.98 (s, 1H), 7.71 (d,  $J = 4.00$  Hz, 1H), 7.63–7.61 (m, 1H), 7.56–7.52 (m, 1H), 7.39–7.34 (m, 1H), 7.24–7.14 (m, 3H), 7.03 (s, 1H), 6.62 (d,  $J = 4.00$  Hz, 1H), 5.71 (brs, 2H), 5.36 (d,  $J = 8.00$  Hz, 1H), 3.69 (s, 3H), 2.40 (s, 3H), 2.15 (s, 3H); ESI ( $m/z$ ): 420 [ $\text{C}_{23}\text{H}_{22}\text{FN}_5\text{O}_2 + \text{H}$ ] $^+$ ; HPLC (Method B) 97.3% (AUC),  $t_R = 7.79$  min; Chiral SFC (Chiralpak IA, Method A) >99% (AUC),  $t_R = 4.82$  min.

***N*-(4-(4-Amino-2,7-dimethyl-7*H*-pyrrolo[2,3-*d*]pyrimidin-5-yl)-3-methylphenyl)-2-hydroxy-2-(2-(trifluoromethyl) phenyl) acetamide (27)**

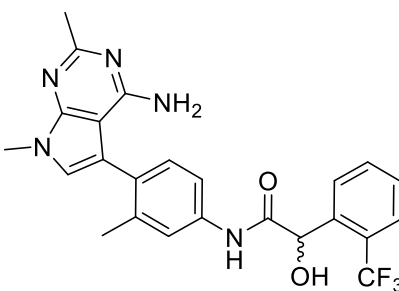

**27**

$^1\text{H}$  NMR (400 MHz,  $\text{DMSO}-d_6$ )  $\delta$  10.13 (s, 1H), 7.78–7.70 (m, 4H), 7.62 (dd,  $J = 1.60, 8.20$  Hz, 1H), 7.54 (t,  $J = 7.60$  Hz, 1H), 7.16 (d,  $J = 8.40$  Hz, 1H), 7.04 (s, 1H), 6.86 (brs, 1H), 5.67 (brs, 2H), 5.44 (s, 1H), 3.69 (s, 3H), 2.40 (s, 3H), 2.16 (s, 3H); ESI ( $m/z$ ): 470 [ $\text{C}_{24}\text{H}_{22}\text{F}_3\text{N}_5\text{O}_2 + \text{H}$ ] $^+$ ; HPLC (Method B) 98.4% (AUC),  $t_R = 8.35$  min.

***(R)*-N-(4-(4-Amino-2,7-dimethyl-7*H*-pyrrolo[2,3-*d*]pyrimidin-5-yl)-3-methylphenyl)-2-(2-chlorophenyl)-2-hydroxyacetamide (29)**

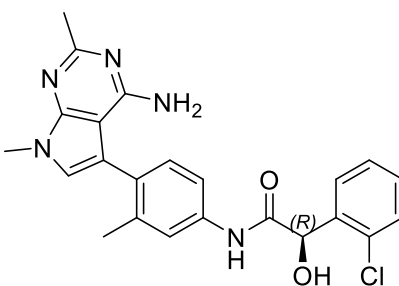

**29**

$^1\text{H}$ -NMR (400 MHz,  $\text{DMSO}-d_6$ )  $\delta$  10.03 (s, 1H), 7.71 (s, 1H), 7.63–7.58 (m, 2H), 7.45 (dd,  $J = 1.60, 7.60$  Hz, 1H), 7.39–7.34 (m, 2H), 7.16 (d,  $J = 8.00$  Hz, 1H), 7.04 (s, 1H), 6.65 (d,  $J = 5.60$  Hz, 1H), 5.72 (brs, 2H), 5.49 (d,  $J = 5.20$  Hz, 1H), 3.70 (s, 3H), 2.41 (s, 3H), 2.16 (s, 3H); ESI ( $m/z$ ): 436 [ $\text{C}_{23}\text{H}_{22}\text{ClN}_5\text{O}_2 + \text{H}$ ] $^+$ ; HPLC (Method B) 98.5% (AUC),  $t_R = 8.16$  min; Chiral SFC (Chiralcel OX-H, Method B) >99% (AUC),  $t_R = 2.62$  min.

***(R)*-N-(4-(4-Amino-2,7-dimethyl-7*H*-pyrrolo[2,3-*d*]pyrimidin-5-yl)-3-methylphenyl)-2-hydroxy-2-(*m*-tolyl)acetamide (30)**

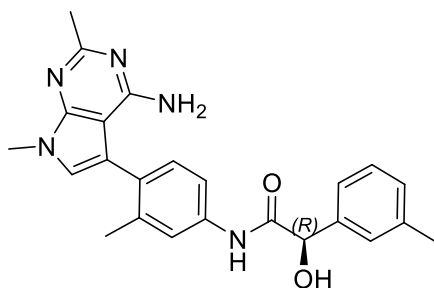

**30**

$^1\text{H}$  NMR (400 MHz,  $\text{DMSO}-d_6$ )  $\delta$  9.89 (s, 1H), 7.68 (d,  $J = 4.00$  Hz, 1H), 7.61–7.59 (m, 1H), 7.33–7.30 (m, 2H), 7.24 (t,  $J = 8.00$  Hz, 1H), 7.14–7.09 (m, 2H), 7.02 (s, 1H), 6.39 (d,  $J = 4.00$  Hz, 1H), 5.58 (brs, 2H), 5.06 (d,  $J = 4.00$  Hz, 1H), 3.68 (s, 3H), 2.39 (s, 3H), 2.31 (s, 3H), 2.14 (s, 3H); ESI ( $m/z$ ): 416 [ $\text{C}_{24}\text{H}_{25}\text{N}_5\text{O}_2 + \text{H}$ ] $^+$ ; HPLC (Method B) >99% (AUC),  $t_R = 8.11$  min; Chiral SFC (Chiralpak IA, Method A) >99% (AUC),  $t_R = 4.16$  min.

***N*-(4-(4-Amino-2,7-dimethyl-7*H*-pyrrolo[2,3-*d*]pyrimidin-5-yl)-3-methylphenyl)-2-hydroxy-2-(*o*-tolyl)acetamide (31)**

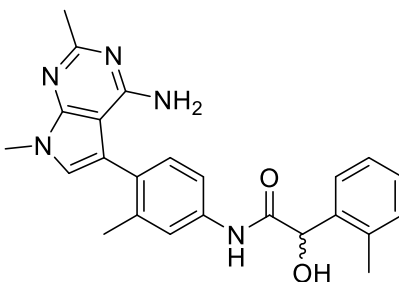

**31**

$^1\text{H}$  NMR (400 MHz,  $\text{DMSO}-d_6$ )  $\delta$  9.90 (s, 1H), 7.72 (d,  $J = 1.60$  Hz, 1H), 7.63 (dd,  $J = 1.60, 8.20$  Hz, 1H), 7.46–7.44 (m, 1H), 7.21–7.14 (m, 4H), 7.03 (s, 1H), 6.42 (d,  $J = 4.80$  Hz, 1H), 5.66 (s, 2H), 5.31 (d,  $J = 3.20$  Hz, 1H), 3.69 (s, 3H), 2.44 (s, 3H), 2.40 (s, 3H), 2.15 (s, 3H); ESI ( $m/z$ ): 416 [ $\text{C}_{24}\text{H}_{25}\text{N}_5\text{O}_2 + \text{H}$ ] $^+$ ; HPLC (Method B) 97.5% (AUC),  $t_R = 8.09$  min.

***(R)*-N-(4-(4-Amino-2,7-dimethyl-7*H*-pyrrolo[2,3-*d*]pyrimidin-5-yl)-3-methylphenyl)-2-(3-ethynylphenyl)-2-hydroxy acetamide (32)**

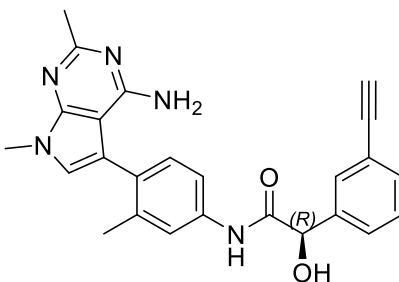

**32**

$^1\text{H}$  NMR (400 MHz,  $\text{DMSO}-d_6$ )  $\delta$  9.94 (brs, 1H), 7.67–7.64 (m, 2H), 7.61–7.55 (m, 2H), 7.42–7.36 (m, 2H), 7.14 (d,  $J = 8.00$  Hz, 1H), 7.01 (s, 1H), 6.57 (brs, 1H), 5.60 (brs, 2H), 5.13 (s, 1H), 4.20 (s, 1H), 3.68 (s, 3H), 2.39 (s, 3H), 2.14 (s, 3H); ESI ( $m/z$ ): 426 [ $\text{C}_{25}\text{H}_{23}\text{N}_5\text{O}_2 + \text{H}$ ] $^+$ ; HPLC (Method A) 97.1% (AUC),  $t_R = 3.19$  min; Chiral SFC (Chiralpak IB, Method D) >99% (AUC),  $t_R = 4.82$  min.

***(R)*-N-(4-(4-Amino-2,7-dimethyl-7*H*-pyrrolo[2,3-*d*]pyrimidin-5-yl)-3-methylphenyl)-2-(3-bromophenyl)-2-hydroxyacetamide (33)**



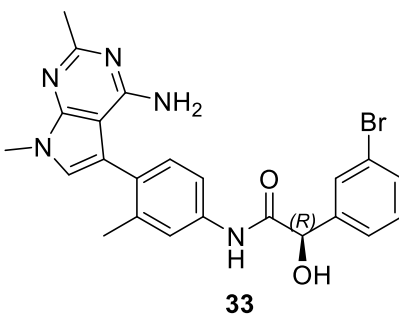

$^1\text{H}$  NMR (400 MHz, DMSO- $d_6$ )  $\delta$  9.96 (s, 1H), 7.73 (s, 1H), 7.67 (d,  $J$  = 2.00 Hz, 1H), 7.60–7.58 (m, 1H), 7.53–7.49 (m, 2H), 7.35–7.31 (m, 1H), 7.14 (d,  $J$  = 8.40 Hz, 1H), 7.02 (s, 1H), 6.58 (d,  $J$  = 8.00 Hz, 1H), 5.60 (brs, 2H), 5.15 (d,  $J$  = 4.00 Hz, 1H), 3.68 (s, 3H), 2.39 (s, 3H), 2.14 (s, 3H); ESI ( $m/z$ ): 480 [ $\text{C}_{23}\text{H}_{22}\text{BrN}_5\text{O}_2 + \text{H}$ ] $^+$ ; HPLC (Method A) >99% (AUC),  $t_R$  = 3.38 min; Chiral SFC (Chiralcel OX-H, Method B) 97.1% (AUC),  $t_R$  = 2.43 min.

**(R)-N-(4-(4-Amino-2,7-dimethyl-7H-pyrrolo[2,3-d]pyrimidin-5-yl)-3-methylphenyl)-2-(5-fluoropyridin-3-yl)-2-hydroxyacetamide (43)**

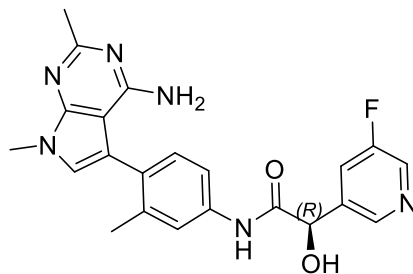

$^1\text{H}$  NMR (400 MHz, DMSO- $d_6$ )  $\delta$  10.06 (s, 1H), 8.61 (s, 1H), 8.54 (d,  $J$  = 2.80 Hz, 1H), 7.83–7.80 (m, 1H), 7.67 (d,  $J$  = 2.00 Hz, 1H), 7.61–7.59 (m, 1H), 7.16 (d,  $J$  = 8.00 Hz, 1H), 7.04 (s, 1H), 6.82 (d,  $J$  = 5.20 Hz, 1H), 5.63 (brs, 2H), 5.30 (d,  $J$  = 5.20 Hz, 1H), 3.69 (s, 3H), 2.40 (s, 3H), 2.15 (s, 3H); ESI ( $m/z$ ): 421 [ $\text{C}_{22}\text{H}_{21}\text{FN}_6\text{O}_2 + \text{H}$ ] $^+$ ; HPLC (Method A) 98.5% (AUC),  $t_R$  = 2.75 min; Chiral SFC (Chiralcel OX-H, Method B) > 99% (AUC),  $t_R$  = 1.35 min.

**(R)-N-(4-(4-Amino-2,7-dimethyl-7H-pyrrolo[2,3-d]pyrimidin-5-yl)-3-methylphenyl)-2-(5-chloropyridin-3-yl)-2-hydroxyacetamide (44)**

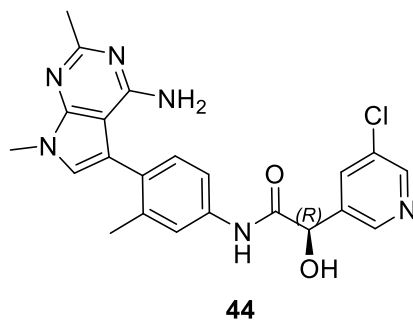

$^1\text{H}$  NMR (400 MHz, DMSO- $d_6$ )  $\delta$  10.04 (s, 1H), 8.68 (s, 1H), 8.59 (d,  $J$  = 2.00 Hz, 1H), 8.03–8.02 (m, 1H), 7.67 (d,  $J$  = 2.00 Hz, 1H), 7.61–7.58 (m, 1H), 7.15 (d,  $J$  = 8.00 Hz, 1H), 7.02 (s, 1H), 6.81 (d,  $J$  = 4.80 Hz, 1H), 5.60 (brs, 2H), 5.28 (d,  $J$  = 5.20 Hz, 1H), 3.69 (s, 3H), 2.40 (s, 3H), 2.15 (s, 3H); ESI ( $m/z$ ): 437 [ $\text{C}_{22}\text{H}_{21}\text{ClN}_6\text{O}_2 + \text{H}$ ] $^+$ ; HPLC (Method A) > 99% (AUC),  $t_R$  = 2.97 min; Chiral SFC (Chiralcel OX-H, Method E) 98.5% (AUC),  $t_R$  = 1.71 min.

**(R)-N-(4-(4-Amino-2,7-dimethyl-7H-pyrrolo[2,3-d]pyrimidin-5-yl)-3-ethylphenyl)-2-(3-fluorophenyl)-2-hydroxyacetamide (59)**

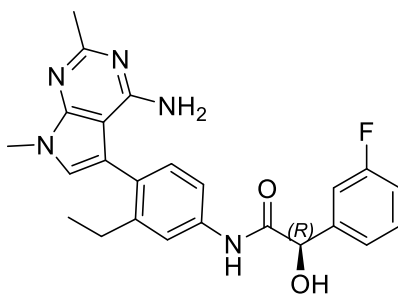

**59**

$^1\text{H}$  NMR (400 MHz,  $\text{DMSO}-d_6$ )  $\delta$  9.98 (s, 1H), 7.70 (d,  $J = 2.00$  Hz, 1H), 7.62 (dd,  $J = 2.00$ , 8.40 Hz, 1H), 7.44–7.34 (m, 3H), 7.16–7.12 (m, 2H), 7.01 (s, 1H), 6.58 (d,  $J = 4.80$  Hz, 1H), 5.72 (brs, 2H), 5.16 (d,  $J = 4.80$  Hz, 1H), 3.69 (s, 3H), 2.56 (q,  $J = 4.00$  Hz, 2H), 2.39 (s, 3H), 0.99 (t,  $J = 3.60$  Hz, 3H); ESI ( $m/z$ ): 434 [ $\text{C}_{24}\text{H}_{24}\text{FN}_5\text{O}_2 + \text{H}$ ] $^+$ ; HPLC (Method B) 98.7% (AUC),  $t_R = 8.35$  min; Chiral SFC (Chiralcel OX-H, Method B) 99.2% (AUC),  $t_R = 4.04$  min.

**(R)-N-(4-(4-Amino-2,7-dimethyl-7H-pyrrolo[2,3-d]pyrimidin-5-yl)phenyl)-2-(3-fluorophenyl)-2-hydroxyacetamide (62)**

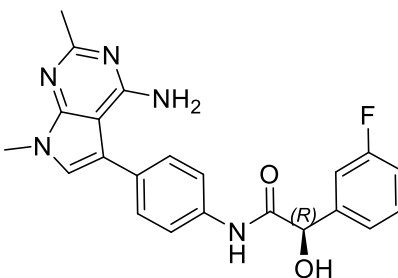

**62**

$^1\text{H}$  NMR (400 MHz,  $\text{DMSO}-d_6$ )  $\delta$  10.08 (s, 1H), 7.78 (d,  $J = 8.0$  Hz, 2H), 7.44–7.34 (m, 5H), 7.15 (s, 2H), 6.62 (d,  $J = 4.0$  Hz, 1H), 5.91 (brs, 2H), 5.17 (d,  $J = 8.0$  Hz, 1H), 3.68 (s, 3H), 2.40 (s, 3H); ESI ( $m/z$ ): 406 [ $\text{C}_{22}\text{H}_{20}\text{FN}_5\text{O}_2 + \text{H}$ ] $^+$ ; HPLC (Method B) 93.4% (AUC),  $t_R = 7.90$  min.; Chiral SFC (Chiralpak IA, Method A) 97.6% (AUC),  $t_R = 7.09$  min.

**(R)-N-(4-(4-Amino-2,7-dimethyl-7H-pyrrolo[2,3-d]pyrimidin-5-yl)phenyl)-2-hydroxy-2-(3-(trifluoromethyl)phenyl)acetamide (63)**

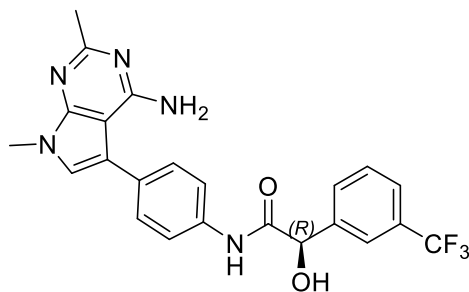

**63**

$^1\text{H}$  NMR (400 MHz,  $\text{DMSO}-d_6$ )  $\delta$  10.11 (s, 1H), 7.91 (s, 1H), 7.84 (d,  $J = 7.60$  Hz, 1H), 7.78 (d,  $J = 8.40$  Hz, 2H), 7.69–7.60 (m, 2H), 7.36 (dd,  $J = 4.00$ , 12.00 Hz, 2H), 7.15 (s, 1H), 6.72 (d,  $J = 4.80$  Hz, 1H), 5.94 (brs, 2H), 5.28 (d,  $J = 4.80$  Hz, 1H), 3.68 (s, 3H), 2.41 (s, 3H); ESI ( $m/z$ ): 456 [ $\text{C}_{23}\text{H}_{20}\text{F}_3\text{N}_5\text{O}_2 + \text{H}$ ] $^+$ ; HPLC (Method A) > 99% (AUC),  $t_R = 3.37$  min; Chiral SFC (Chiralcel OX-H, Method B) > 99 % (AUC),  $t_R = 3.36$  min.

**(R)-N-(4-(4-Amino-2,7-dimethyl-7H-pyrrolo[2,3-d]pyrimidin-5-yl)phenyl)-2-(3-bromophenyl)-2-hydroxyacetamide (64)**

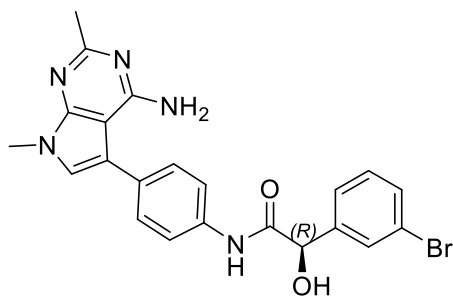

**64**

$^1\text{H}$  NMR (400 MHz,  $\text{DMSO-}d_6$ )  $\delta$  10.05 (s, 1H), 7.78 (d,  $J$  = 8.40 Hz, 2H), 7.74 (s, 1H), 7.54–7.49 (m, 2H), 7.37–7.32 (m, 3H), 7.15 (s, 1H), 6.61 (d,  $J$  = 4.80 Hz, 1H), 5.94 (brs, 2H), 5.16 (d,  $J$  = 4.40 Hz, 1H), 3.68 (s, 3H), 2.41 (s, 3H); ESI ( $m/z$ ): 466 [ $\text{C}_{22}\text{H}_{20}\text{BrN}_5\text{O}_2 + \text{H}$ ] $^+$ ; HPLC (Method A) 97.9 % (AUC),  $t_R$  = 3.22 min; Chiral SFC (ChiralPak IB, Method D) >99 % (AUC),  $t_R$  = 2.63 min.

#### Synthesis of Phenyl (4-(4-Amino-7-methyl-7H-pyrrolo[2,3-d]pyrimidin-5-yl)-3-methylphenyl)carbamate (**18**)

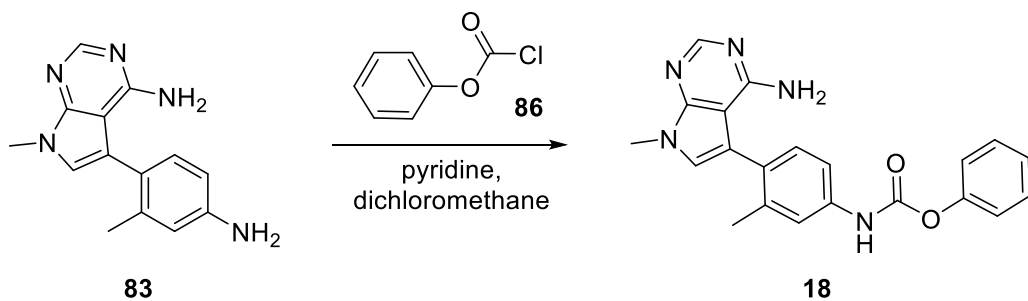

To a solution of 5-(4-amino-2-methylphenyl)-7-methyl-7H-pyrrolo[2,3-d]pyrimidin-4-amine (**83**, 200 mg, 0.79 mmol) in methylene chloride (15 mL) were added pyridine (124 mg, 1.58 mmol) followed by phenyl chloroformate (**86**, 1.18 mL, 0.94 mmol) at 0 °C. The resulting reaction mixture was allowed to warm to room temperature and stirred for 1 h. After this, the reaction mixture was concentrated under vacuum to afford crude product, which was purified by combi flash column chromatography (5% methanol in methylene chloride as an eluent) to provide phenyl (4-(4-amino-7-methyl-7H-pyrrolo[2,3-d]pyrimidin-5-yl)-3-methylphenyl)carbamate (**18**, 90 mg, 40%).  $^1\text{H}$  NMR (400 MHz,  $\text{DMSO-}d_6$ )  $\delta$  10.31 (s, 1H), 8.13 (s, 1H), 7.42–7.50 (m, 4H), 7.15–7.29 (m, 5H), 5.76 (br s, 2H), 3.74 (s, 3H), 2.17 (s, 3H); ESI ( $m/z$ ): 374 [ $\text{C}_{21}\text{H}_{19}\text{N}_5\text{O}_2 + \text{H}$ ] $^+$ .

#### Synthesis of 3-(4-(4-Amino-7-methyl-7H-pyrrolo[2,3-d]pyrimidin-5-yl)-3-methylphenyl)-1-methyl-1-phenylurea (**20**)

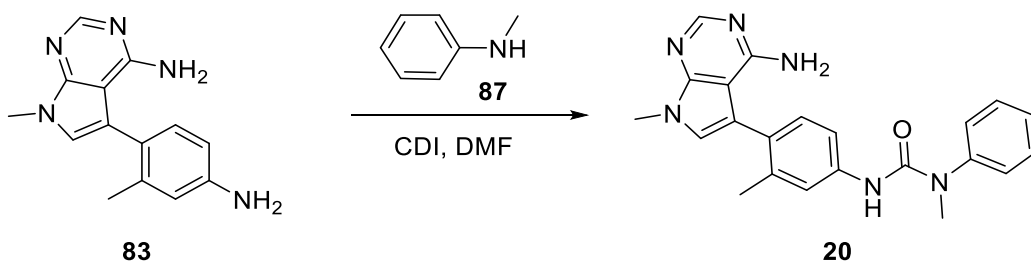

To a solution of 5-(4-amino-2-methylphenyl)-7-methyl-7H-pyrrolo[2,3-d]pyrimidin-4-amine (**83**, 150 mg, 0.59 mmol) and *N*-methyl aniline (**87**, 0.95 g, 0.89 mmol) in *N,N*-dimethylformamide (10 mL) was added 1,1'-carbonyldiimidazole (CDI) (192 mg, 1.18 mmol) at room temperature, and the mixture was stirred for 16 h. After this time, the reaction mixture was quenched with water (20 mL). The resulting solid was isolated by filtration and dried. The crude material was purified by combi flash column chromatography (5% methanol in methylene chloride as an eluent) to afford 3-(4-(4-amino-7-methyl-7H-pyrrolo[2,3-d]pyrimidin-5-yl)-3-methylphenyl)-1-methyl-1-phenylurea (**20**).  $^1\text{H}$  NMR (400 MHz,  $\text{DMSO-}d_6$ )  $\delta$  8.19 (s, 1H), 8.12 (s, 1H), 7.33–7.44 (m, 6H), 7.24–7.28 (m, 1H), 7.08–7.12 (m, 2H), 5.76 (br s, 2H), 3.73 (s, 3H), 3.28 (s, 3H), 2.12 (s, 3H); ESI ( $m/z$ ): 387 [ $\text{C}_{22}\text{H}_{22}\text{N}_6\text{O} + \text{H}$ ] $^+$ .

The following compounds were prepared by following the same procedure for synthesizing **20**:

#### 1-(4-(4-Amino-7-methyl-7H-pyrrolo[2,3-d]pyrimidin-5-yl)-3-methylphenyl)-3-phenylurea (**19**)

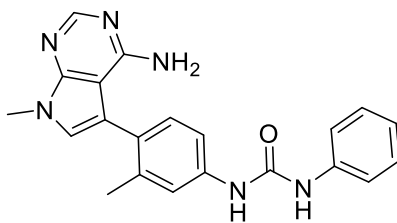

**19**

$^1\text{H}$  NMR (400 MHz,  $\text{DMSO}-d_6$ )  $\delta$  8.69 (d,  $J = 4.00$  Hz, 2H), 8.13 (s, 1H), 7.47–7.44 (m, 3H), 7.36 (dd,  $J = 8.00$  Hz, 1H), 7.28 (t,  $J = 8.00$  Hz, 2H), 7.16 (s, 1H), 7.13 (s, 1H), 6.97 (t,  $J = 8.00$  Hz, 1H), 5.75 (s, 2H), 3.74 (s, 3H), 2.17 (s, 3H); ESI ( $m/z$ ): 373 [ $\text{C}_{21}\text{H}_{20}\text{N}_6\text{O} + \text{H}$ ] $^+$ ; HPLC (Method C) 98.3% (AUC),  $t_R = 6.55$  min.

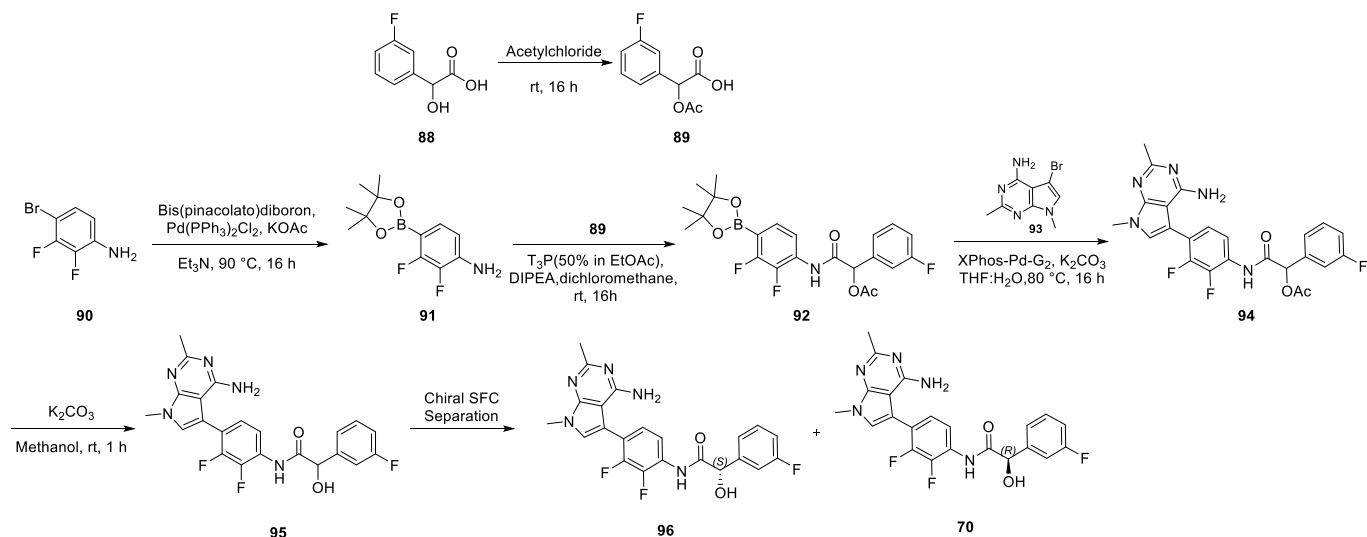

**Scheme S2. Synthesis of (*S*)-*N*-(4-(4-amino-2,7-dimethyl-7*H*-pyrrolo[2,3-*d*]pyrimidin-5-yl)-2,3-difluorophenyl)-2-(3-fluorophenyl)-2-hydroxyacetamide (**96**) and (*R*)-*N*-(4-(4-amino-2,7-dimethyl-7*H*-pyrrolo[2,3-*d*]pyrimidin-5-yl)-2,3-difluorophenyl)-2-(3-fluorophenyl)-2-hydroxyacetamide (**70**).**

#### 2-Acetoxy-2-(3-fluorophenyl)acetic acid (**89**):

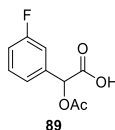

Acetyl chloride (40.0 mL) was treated with 2-(3-fluorophenyl)-2-hydroxyacetic acid (**88**, 20.0 g, 118 mmol) portion wise over a period of 10 min. at 0 °C. The reaction mixture was allowed to warm to room temperature and stirred for 16 h. After this time, the reaction mixture was concentrated under reduced pressure. Co-distillation with hexane afforded 2-acetoxy-2-(3-fluorophenyl)acetic acid (**89**, 20.0 g, 85%) as a white solid. ESI (*m/z*): 213.1 [C<sub>10</sub>H<sub>9</sub>FO<sub>4</sub> + H]<sup>+</sup>.

#### 2,3-Difluoro-4-(4,4,5,5-tetramethyl-1,3,2-dioxaborolan-2-yl)aniline (**91**):

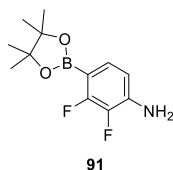

To a stirred solution of 4-bromo-2,3-difluoroaniline (**90**, 50.0 g, 241 mmol) in triethylamine (500 mL) under argon atmosphere were added bis(pinacolato)diboron (73.3 g, 289 mmol) followed by potassium acetate (70.8 g, 723 mmol). The resulting reaction mixture was purged with argon for 15 min. followed by addition of bis(triphenylphosphine)palladium(II) chloride (8.44 g, 12.0 mmol). After addition was complete, the resulting mixture was again purged with argon for 10 min. and heated at 90 °C with stirring for 16 h. After this time, the reaction mixture was allowed to cool to room temperature, passed through a bed of diatomaceous earth and washed with methylene chloride (3 × 500 mL). The filtrate was washed with water (2 × 500 mL) followed by brine solution (2 × 250 mL). The organic layer was separated, dried over anhydrous sodium sulfate and concentrated under reduced pressure. The crude material was purified by column chromatography (silica gel (100-200 mesh size), 10% ethyl acetate/hexanes as an eluent) to afford 2,3-difluoro-4-(4,4,5,5-tetramethyl-1,3,2-dioxaborolan-2-yl) aniline (**91**, 36.00 g, 62%) as a pale brown solid.

<sup>1</sup>H NMR (400 MHz, DMSO-*d*<sub>6</sub>) δ 7.10–7.06 (m, 1H), 6.54–6.50 (m, 1H), 5.92 (s, 2H), 1.25 (s, 12H); ESI (*m/z*): 256 [C<sub>12</sub>H<sub>16</sub>BF<sub>2</sub>NO<sub>2</sub> + H]<sup>+</sup>.

#### 2-((2,3-Difluoro-4-(4,4,5,5-tetramethyl-1,3,2-dioxaborolan-2-yl)phenyl)amino)-1-(3-fluorophenyl)-2-oxoethyl Acetate (**92**):

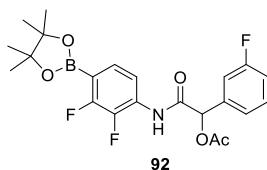

To a solution of 2,3-difluoro-4-(4,4,5,5-tetramethyl-1,3,2-dioxaborolan-2-yl)aniline (**91**, 14.0 g, 54.9 mmol) and 2-(3-fluorophenyl)-2-hydroxyacetic acid (**89**, 14.00 g, 65.88 mmol) in methylene chloride (280 mL) were added *N,N*-diisopropylethylamine (28.7 mL, 165 mmol) followed by drop-wise addition of propylphosphonic anhydride (T<sub>3</sub>P) (50% in ethyl acetate) (52.3 mL, 82.4 mmol) at 0 °C. After addition was complete, the reaction mixture was allowed to warm to room temperature and stirred for 16 h. After this time, the reaction mixture was cooled to 0 °C, diluted with methylene chloride (100 mL) and washed with saturated sodium bicarbonate solution (100 mL). The organic layer was separated, washed with water (200 mL) and brine solution (200 mL), dried over anhydrous sodium sulfate and concentrated under reduced pressure. The crude material was purified by column chromatography (silica gel (100-200 mesh size), 10–20% ethyl acetate/hexanes as an eluent) to afford 2-((2,3-difluoro-4-(4,4,5,5-tetramethyl-1,3,2-dioxaborolan-2-yl)phenyl)amino)-1-(3-fluorophenyl)-2-oxoethyl acetate (**92**, 17.00 g, 69%) as pale brown viscous mass. <sup>1</sup>H NMR (400 MHz, DMSO-*d*<sub>6</sub>) δ 7.70 (t, *J* = 7.2 Hz, 1H), 7.52–7.42 (m, 1H), 7.43–7.36 (m, 2H), 7.28–7.23 (m, 1H), 6.22 (s, 1H), 2.17 (s, 3H), 1.38 (s, 12H). ESI (*m/z*): 449 [C<sub>22</sub>H<sub>23</sub>BF<sub>3</sub>NO<sub>5</sub> + H]<sup>+</sup>.

**2-((4-(4-Amino-2,7-dimethyl-7H-pyrrolo[2,3-*d*]pyrimidin-5-yl)-2,3-difluorophenyl)amino)-1-(3-fluorophenyl)-2-oxoethyl acetate (**94**):**

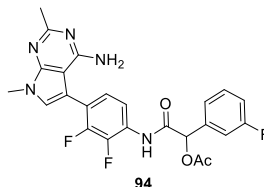

To a stirred solution of 5-bromo-2,7-dimethyl-7H-pyrrolo[2,3-*d*]pyrimidin-4-amine (**93**, 5.00 g, 20.8 mmol) in tetrahydrofuran (120 mL) and water (16 mL) were added 2-((2,3-difluoro-4-(4,4,5,5-tetramethyl-1,3,2-dioxaborolan-2-yl)phenyl)amino)-1-(3-fluorophenyl)-2-oxoethyl acetate (**5**, 12.15 g, 27.08 mmol) followed by potassium carbonate (8.62 g, 62.5 mmol), and the resulting reaction mixture was purged with argon for 10 min. Then, [2-(2-aminophenyl)phenyl]-chloro-palladium dicyclohexyl-[3-(2,4,6-triisopropylphenyl)phenyl]phosphane (XPhos-Pd-G<sub>2</sub>) (1.63 g, 2.00 mmol) was added and the resulting reaction mixture was purged with argon for 10 min. The reaction mixture was heated to stirred at 80 °C for 4 h. After this, the reaction mixture was allowed to cool to room temperature, filtered through a bed of diatomaceous earth, and washed with ethyl acetate (2 × 100 mL). The filtrates were combined, washed with water (50 mL) and brine solution (50 mL). The organic layer was separated, dried over anhydrous sodium sulfate and concentrated under reduced pressure. The crude material was purified by combi flash column chromatography (5% methanol/methylene chloride as an eluent) to afford 2-((4-(4-amino-2,7-dimethyl-7H-pyrrolo[2,3-*d*]pyrimidin-5-yl)-2,3-difluorophenyl)amino)-1-(3-fluorophenyl)-2-oxoethyl acetate (**94**, 6.00 g, 60%) as an off white solid. <sup>1</sup>H NMR (400 MHz, DMSO-*d*<sub>6</sub>) δ 10.48 (s, 1H), 7.69–7.66 (m, 1H), 7.52–7.38 (m, 3H), 7.27–7.23 (m, 2H), 7.14–7.09 (m, 1H), 6.23 (s, 1H), 6.08 (br s, 2H), 3.69 (s, 3H), 2.40 (s, 3H), 2.17 (s, 3H); ESI (*m/z*): 484 [C<sub>24</sub>H<sub>20</sub>F<sub>3</sub>N<sub>5</sub>O<sub>3</sub> + H]<sup>+</sup>.

**(*S*)-*N*-(4-(4-Amino-2,7-dimethyl-7H-pyrrolo[2,3-*d*]pyrimidin-5-yl)-2,3-difluorophenyl)-2-(3-fluorophenyl)-2-hydroxyacetamide (**96**) and (*R*)-*N*-(4-(4-amino-2,7-dimethyl-7H-pyrrolo[2,3-*d*]pyrimidin-5-yl)-2,3-difluorophenyl)-2-(3-fluorophenyl)-2-hydroxyacetamide (**70**):**

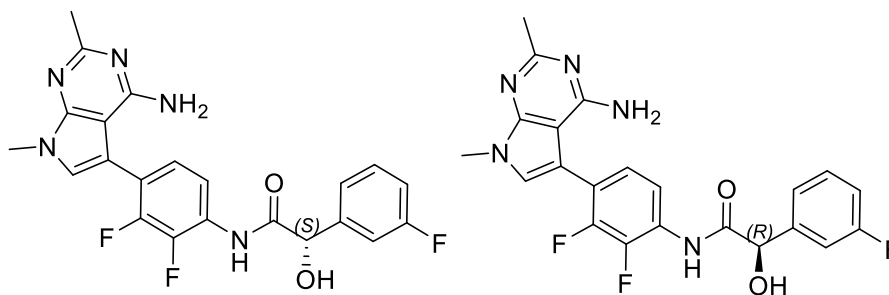

**96 (Peak 1)**

**70 (Peak 2)**

To a stirred solution of 2-((4-(4-amino-2,7-dimethyl-7H-pyrrolo[2,3-*d*]pyrimidin-5-yl)-2,3-difluorophenyl)amino)-1-(3-fluorophenyl)-2-oxoethyl acetate (**94**, 10.00 g, 20.70 mmol) in methanol (200 mL) was added potassium carbonate (3.42 g, 24.8 mmol), and the reaction mixture was stirred at ambient temperature for 1 h under argon. After this time, the reaction mixture was concentrated under vacuum to afford a viscous mass, which was diluted with water (250 mL). The resulting solid precipitate was isolated by filtration, washed with acetonitrile (50 mL) and dried under vacuum to afford racemic *N*-(4-(4-amino-2,7-dimethyl-7H-pyrrolo[2,3-*d*]pyrimidin-5-yl)-2,3-difluorophenyl)-2-(3-fluorophenyl)-2-hydroxyacetamide (**95**, 8.00 g, 88%) as an off white solid. <sup>1</sup>H NMR (400 MHz, DMSO-*d*<sub>6</sub>) δ 9.98 (br s, 1H), 7.69–7.66 (m, 1H), 7.45–7.32 (m, 3H), 7.25 (s, 1H), 7.16–7.11 (m, 2H), 6.80 (br s, 1H), 6.06 (br s, 2H), 5.28 (s, 1H), 3.70 (s, 3H), 2.40 (s, 3H); ESI (*m/z*): 442 [C<sub>22</sub>H<sub>18</sub>F<sub>3</sub>N<sub>5</sub>O<sub>2</sub> + H]<sup>+</sup>.

The mixture was combined with another batch of material and a total 30 g of racemate was separated into two pure enantiomers by chiral SFC (supercritical fluid chromatography) (Chiralcel OJ-H column, 0.3% DEA in methanol in CO<sub>2</sub>, 40 °C temperature).

**96 (Peak 1)** (10.90 g) as an off-white solid. <sup>1</sup>H NMR (400 MHz, DMSO-*d*<sub>6</sub>) δ 9.88 (s, 1H), 7.70–7.66 (m, 1H), 7.45–7.33 (m, 3H), 7.25 (s, 1H), 7.17–7.12 (m, 2H), 6.77 (br s, 1H), 6.07 (br s, 2H), 5.29 (br s, 1H), 3.70 (s, 3H), 2.41 (s, 3H); ESI (*m/z*) 442 [C<sub>22</sub>H<sub>18</sub>F<sub>3</sub>N<sub>5</sub>O<sub>2</sub> + H]<sup>+</sup>; HPLC (Method B) 98.3% (AUC), *t*<sub>R</sub> = 8.09 min; Chiral SFC (Chiralcel OJ-H, Method C) >99% (AUC), *t*<sub>R</sub> = 4.67 min.

**70 (Peak 2)** (11.00 g) as off-white solid:  $^1\text{H}$  NMR (400 MHz,  $\text{DMSO-}d_6$ )  $\delta$  9.87 (s, 1H), 7.69–7.65 (m, 1H), 7.45–7.32 (m, 3H), 7.25 (s, 1H), 7.17–7.12 (m, 2H), 6.76 (d,  $J = 5.2$  Hz, 1H), 6.06 (br s, 2H), 5.29 (d,  $J = 4.8$  Hz, 1H), 3.70 (s, 3H), 2.40 (s, 3H); ESI ( $m/z$ ) 442  $[\text{C}_{22}\text{H}_{18}\text{F}_3\text{N}_5\text{O}_2 + \text{H}]^+$ ; HPLC (Method B) >99% (AUC),  $t_R = 8.09$  min; Chiral SFC (Chiralcel OJ-H, Method C) >99% (AUC),  $t_R = 5.37$  min.

The following compounds were prepared by following the same procedure for synthesizing **70**:

**(R)-N-(4-(4-Amino-2,7-dimethyl-7H-pyrrolo[2,3-d]pyrimidin-5-yl)-3-methylphenyl)-2-hydroxy-2-(3-(trifluoromethyl) phenyl) acetamide (26):**

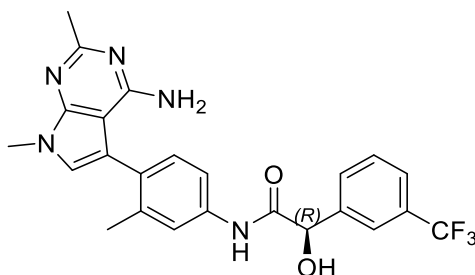

**26**

$^1\text{H}$  NMR (400 MHz,  $\text{DMSO-}d_6$ )  $\delta$  10.06 (s, 1H), 7.91 (s, 1H), 7.84 (d,  $J = 7.60$  Hz, 1H), 7.70–7.59 (m, 4H), 7.15 (d,  $J = 8.40$  Hz, 1H), 7.03 (s, 1H), 6.72 (d,  $J = 5.20$  Hz, 1H), 5.63 (brs, 2H), 5.28 (d,  $J = 4.80$  Hz, 1H), 3.69 (s, 3H), 2.40 (s, 3H), 2.15 (s, 3H); ESI ( $m/z$ ): 470  $[\text{C}_{24}\text{H}_{22}\text{F}_3\text{N}_5\text{O}_2 + \text{H}]^+$ ; HPLC (Method B) >99 % (AUC),  $t_R = 7.73$  min; Chiral SFC (Chiralcel OX-H, Method B) >99 % (AUC),  $t_R = 2.57$  min.

**(R)-N-(4-(4-Amino-2,7-dimethyl-7H-pyrrolo[2,3-d]pyrimidin-5-yl)-3-methylphenyl)-2-(3-chlorophenyl)-2-hydroxyacetamide (28):**

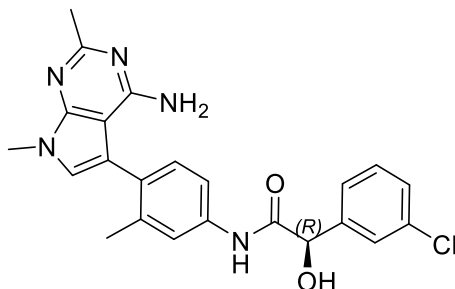

**28**

$^1\text{H}$  NMR (400 MHz,  $\text{DMSO-}d_6$ )  $\delta$  9.99 (s, 1H), 7.67 (d,  $J = 1.60$  Hz, 1H), 7.61–7.59 (m, 2H), 7.49 (d,  $J = 7.20$  Hz, 1H), 7.42–7.36 (m, 2H), 7.15 (d,  $J = 8.00$  Hz, 1H), 7.03 (s, 1H), 6.61 (d,  $J = 4.80$  Hz, 1H), 5.62 (m, 2H), 5.16 (d,  $J = 4.80$  Hz, 1H), 3.69 (s, 3H), 2.40 (s, 3H), 2.15 (s, 3H); ESI ( $m/z$ ): 436  $[\text{C}_{23}\text{H}_{22}\text{ClN}_5\text{O}_2 + \text{H}]^+$ ; HPLC (Method B) 98.5% (AUC),  $t_R = 8.35$  min; Chiral SFC (Chiralcel OX-H, Method B) >99% (AUC),  $t_R = 2.17$  min.

**(R)-N-(4-(4-Amino-2,7-dimethyl-7H-pyrrolo[2,3-d]pyrimidin-5-yl)-3-methylphenyl)-2-(3-(difluoromethyl) phenyl)-2-hydroxyacetamide (34):**

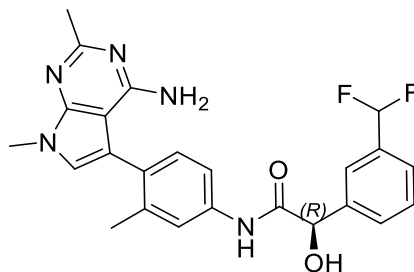

**34**

$^1\text{H}$  NMR (400 MHz,  $\text{DMSO-}d_6$ )  $\delta$  10.00 (s, 1H), 7.74 (s, 1H), 7.69–7.64 (m, 2H), 7.60 (dd,  $J = 2.00, 8.00$  Hz, 1H), 7.53–7.51 (m, 2H), 7.21–6.93 (m, 3H), 6.62 (d,  $J = 4.00$  Hz, 1H), 5.76 (brs, 2H), 5.21 (d,  $J = 0.80$  Hz, 1H), 3.68 (s, 3H), 2.39 (s, 3H), 2.14 (s, 3H); ESI ( $m/z$ ): 452

[C<sub>24</sub>H<sub>23</sub>F<sub>2</sub>N<sub>5</sub>O<sub>2</sub> + H]<sup>+</sup>; HPLC (Method A) 98.9% (AUC), *t<sub>R</sub>* = 3.32 min; Chiral SFC (Chiralcel OX-H, Method B) 98.4% (AUC), *t<sub>R</sub>* = 1.51 min.

**(*R*)-*N*-(4-(4-Amino-2,7-dimethyl-7*H*-pyrrolo[2,3-*d*]pyrimidin-5-yl)-3-methylphenyl)-2-(3-cyclopropylphenyl)-2-hydroxyacetamide (35):**

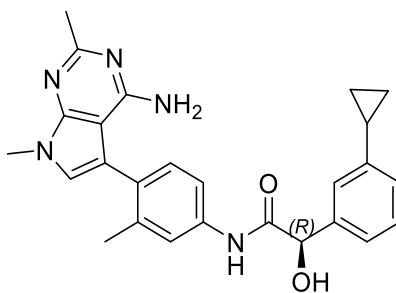

**35**

<sup>1</sup>H NMR (400 MHz, DMSO-*d*<sub>6</sub>) δ 9.90 (s, 1H), 7.68–7.67 (m, 1H), 7.60 (dd, *J* = 4.00 Hz, 8.00 Hz, 1H), 7.28–7.20 (m, 3H), 7.13 (d, *J* = 8.00 Hz, 1H), 7.02 (s, 1H), 6.98 (d, *J* = 8.00 Hz, 2H), 6.38 (d, *J* = 8.00 Hz, 1H), 5.63 (s, 2H), 5.06 (d, *J* = 4.00 Hz, 1H), 3.68 (s, 3H), 2.39 (s, 3H), 2.14 (s, 3H), 1.95–1.88 (m, 1H), 0.97–0.93 (m, 2H), 0.67–0.53 (m, 2H); ESI (*m/z*): 442 [C<sub>26</sub>H<sub>27</sub>N<sub>5</sub>O<sub>2</sub> + H]<sup>+</sup>; HPLC (Method A) 99.9% (AUC), *t<sub>R</sub>* = 3.51 min; Chiral SFC (Chiralcel OJ-H, Method C) 97.2% (AUC), *t<sub>R</sub>* = 5.18 min.

**(*R*)-*N*-(4-(4-Amino-2,7-dimethyl-7*H*-pyrrolo[2,3-*d*]pyrimidin-5-yl)-3-methylphenyl)-2-(3-cyanophenyl)-2-hydroxyacetamide (36):**

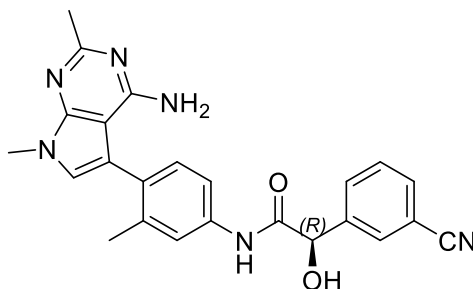

**36**

<sup>1</sup>H NMR (400 MHz, DMSO-*d*<sub>6</sub>) δ 9.99 (s, 1H), 7.96 (s, 1H), 7.87 (d, *J* = 7.60 Hz, 1H), 7.79 (d, *J* = 7.60 Hz, 1H), 7.66 (dd, *J* = 2.00 Hz, 1H), 7.62–7.58 (m, 2H), 7.15 (d, *J* = 8.00 Hz, 1H), 7.02 (s, 1H), 6.71 (d, *J* = 4.80 Hz, 1H), 5.62 (brs, 2H), 5.23 (d, *J* = 4.80 Hz, 1H), 3.69 (s, 3H), 2.40 (s, 3H), 2.15 (s, 3H); ESI (*m/z*): 427 [C<sub>24</sub>H<sub>22</sub>N<sub>6</sub>O<sub>2</sub> + H]<sup>+</sup>; HPLC (Method A) 97.2% (AUC), *t<sub>R</sub>* = 2.95 min; Chiral SFC (ChiralPak IB, Method D) >99% (AUC), *t<sub>R</sub>* = 4.14 min.

**(*R*)-*N*-(4-(4-Amino-2,7-dimethyl-7*H*-pyrrolo[2,3-*d*]pyrimidin-5-yl)-3-methylphenyl)-2-hydroxy-2-(3-(methylsulfonyl)phenyl)acetamide (37):**

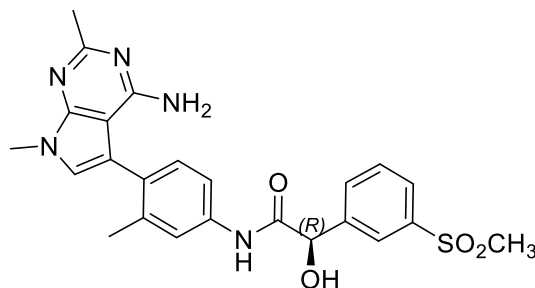

**37**

<sup>1</sup>H NMR (400 MHz, DMSO-*d*<sub>6</sub>) δ 8.12 (s, 1H), 7.89–7.87 (m, 2H), 7.68–7.64 (m, 2H), 7.61–7.59 (m, 1H), 7.15 (d, *J* = 8.00 Hz, 1H), 7.02 (s, 1H), 5.60 (brs, 2H), 5.29 (s, 1H), 3.69 (s, 3H), 3.23 (s, 3H), 2.40 (s, 3H), 2.15 (s, 3H); ESI (*m/z*): 480 [C<sub>24</sub>H<sub>25</sub>N<sub>5</sub>O<sub>4</sub>S + H]<sup>+</sup>; HPLC (Method A) 99.3% (AUC), *t<sub>R</sub>* = 2.86 min; Chiral SFC (Chiralcel OX-H, Method B) 97.6% (AUC), *t<sub>R</sub>* = 2.73 min.

**(*R*)-*N*-(4-(4-Amino-2,7-dimethyl-7*H*-pyrrolo[2,3-*d*]pyrimidin-5-yl)-3-methylphenyl)-2-(3,5-difluorophenyl)-2-hydroxyacetamide (38):**



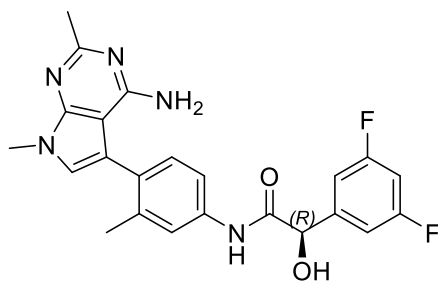

**38**

$^1\text{H}$  NMR (400 MHz, DMSO- $d_6$ )  $\delta$  10.00 (s, 1H), 7.66 (d,  $J$  = 2.00 Hz, 1H), 7.60 (dd,  $J$  = 2.00, 8.20 Hz, 1H), 7.26–7.14 (m, 4H), 7.03 (s, 1H), 6.74 (d,  $J$  = 4.80 Hz, 1H), 5.66 (brs, 2H), 5.19 (d,  $J$  = 4.80 Hz, 1H), 3.69 (s, 3H), 2.40 (s, 3H), 2.15 (s, 3H) (one NH not appearing); ESI ( $m/z$ ): 438 [ $\text{C}_{23}\text{H}_{21}\text{F}_2\text{N}_5\text{O}_2 + \text{H}$ ] $^{++}$ ; HPLC (Method B) >99% (AUC),  $t_R$  = 8.11 min; Chiral SFC (Chiralcel OX-H, Method B) >99% (AUC),  $t_R$  = 2.39 min.

**(R)-N-(4-(4-Amino-2,7-dimethyl-7H-pyrrolo[2,3-d]pyrimidin-5-yl)-3-methylphenyl)-2-(3-fluoro-5-(trifluoromethyl)phenyl)-2-hydroxyacetamide (39):**

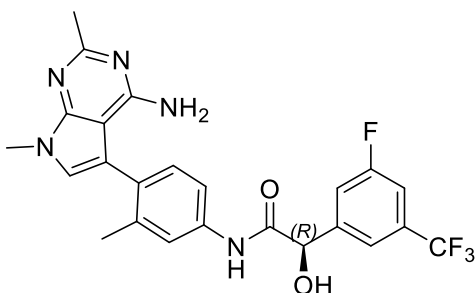

**39**

$^1\text{H}$  NMR (400 MHz, DMSO- $d_6$ )  $\delta$  10.07 (s, 1H), 7.78 (s, 1H), 7.70–7.58 (m, 4H), 7.15 (d,  $J$  = 8.40 Hz, 1H), 7.03 (s, 1H), 6.87 (d,  $J$  = 5.20 Hz, 1H), 5.54 (brs, 2H), 5.31 (d,  $J$  = 4.80 Hz, 1H), 3.69 (s, 3H), 2.40 (s, 3H), 2.15 (s, 3H); ESI ( $m/z$ ): 488 [ $\text{C}_{24}\text{H}_{21}\text{F}_4\text{N}_5\text{O}_2 + \text{H}$ ] $^+$ ; HPLC (Method B) >99% (AUC),  $t_R$  = 8.79 min; Chiral SFC (ChiralPak IB, Method D) >99% (AUC),  $t_R$  = 1.88 min.

**(R)-N-(4-(4-Amino-2,7-dimethyl-7H-pyrrolo[2,3-d]pyrimidin-5-yl)-3-methylphenyl)-2-(3-chloro-5-fluorophenyl)-2-hydroxyacetamide (40):**

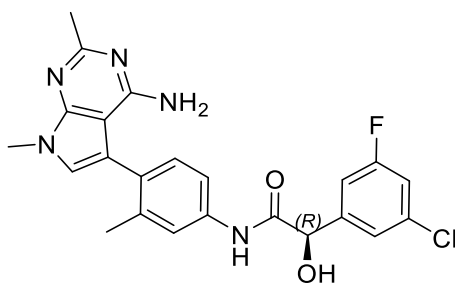

**40**

$^1\text{H}$  NMR (400 MHz, DMSO- $d_6$ )  $\delta$  9.98 (s, 1H), 7.66 (d,  $J$  = 1.60 Hz, 1H), 7.59 (dd,  $J$  = 2.00, 8.40 Hz, 1H), 7.46 (s, 1H), 7.40–7.34 (m, 2H), 7.15 (d,  $J$  = 8.00 Hz, 1H), 7.02 (s, 1H), 6.73 (d,  $J$  = 4.80 Hz, 1H), 5.58 (brs, 2H), 5.19 (d,  $J$  = 5.20 Hz, 1H), 3.69 (s, 3H), 2.40 (s, 3H), 2.15 (s, 3H); ESI ( $m/z$ ): 454 [ $\text{C}_{23}\text{H}_{21}\text{ClFN}_5\text{O}_2 + \text{H}$ ] $^+$ ; HPLC (Method A) 97.6% (AUC),  $t_R$  = 3.46 min; Chiral SFC (Chiralcel OX-H, Method B) 97.7% (AUC),  $t_R$  = 1.25 min

**(R)-N-(4-(4-Amino-2,7-dimethyl-7H-pyrrolo[2,3-d]pyrimidin-5-yl)-3-methylphenyl)-2-(3-fluoro-5-methylphenyl)-2-hydroxyacetamide (41):**

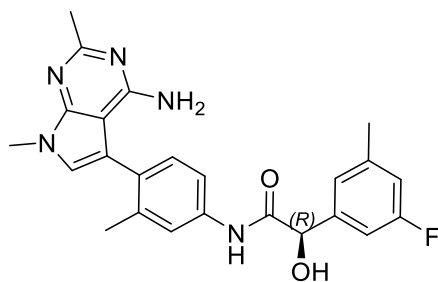

**41**

$^1\text{H}$  NMR (400 MHz,  $\text{DMSO-}d_6$ )  $\delta$  9.92 (brs, 1H), 7.66 (s, 1H), 7.60 (d,  $J$  = 8.00 Hz, 1H), 7.18–7.13 (m, 3H), 7.01 (s, 1H), 6.96 (d,  $J$  = 12.00 Hz, 1H), 6.53 (brs, 1H), 5.60 (brs, 2H), 5.10 (s, 1H), 3.68 (s, 3H), 2.39 (s, 3H), 2.32 (s, 3H), 2.15 (s, 3H); ESI ( $m/z$ ): 434 [ $\text{C}_{24}\text{H}_{24}\text{FN}_5\text{O}_2 + \text{H}$ ] $^+$ . HPLC (Method B) >99% (AUC),  $t_R$  = 8.28 min.

**(R)-N-(4-(4-Amino-2,7-dimethyl-7H-pyrrolo[2,3-d]pyrimidin-5-yl)-2-fluoro-3-methylphenyl)-2-(3-fluorophenyl)-2-hydroxyacetamide (65):**

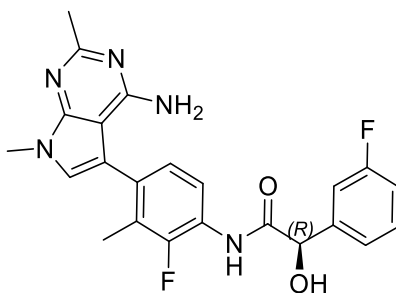

**65**

$^1\text{H}$  NMR (400 MHz,  $\text{DMSO-}d_6$ )  $\delta$  9.62 (s, 1H), 7.82 (t,  $J$  = 8.00 Hz, 1H), 7.45–7.32 (m, 3H), 7.17–7.12 (m, 1H), 7.08 (s, 1H), 7.04 (d,  $J$  = 8.00 Hz, 1H), 6.82 (d,  $J$  = 4.80 Hz, 1H), 5.76 (brs, 2H), 5.28 (d,  $J$  = 4.80 Hz, 1H), 3.70 (s, 3H), 2.41 (s, 3H), 2.13 (d,  $J$  = 2.40 Hz, 3H); ESI ( $m/z$ ): 438 [ $\text{C}_{23}\text{H}_{21}\text{F}_2\text{N}_5\text{O}_2 + \text{H}$ ] $^+$ ; HPLC (Method A) >99% (AUC),  $t_R$  = 3.40 min; Chiral SFC (Chiralcel OD-H, Method F) >99% (AUC),  $t_R$  = 3.23 min.

**(R)-N-(5-(4-Amino-2,7-dimethyl-7H-pyrrolo[2,3-d]pyrimidin-5-yl)-6-methylpyridin-2-yl)-2-(3-fluorophenyl)-2-hydroxyacetamide (72):**

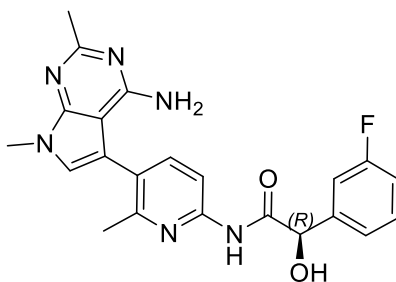

**72**

$^1\text{H}$  NMR (400 MHz,  $\text{DMSO-}d_6$ )  $\delta$  10.13 (s, 1H), 7.92 (d,  $J$  = 8.4 Hz, 1H), 7.56 (d,  $J$  = 8.0 Hz, 1H), 7.44–7.33 (m, 3H), 7.15–7.10 (m, 1H), 7.09 (s, 1H), 6.57 (d,  $J$  = 6.0 Hz, 1H), 5.82 (brs, 2H), 5.30 (d,  $J$  = 5.0 Hz, 1H), 3.68 (s, 3H), 2.39 (s, 3H), 2.34 (s, 3H); ESI ( $m/z$ ): 421 [ $\text{C}_{22}\text{H}_{21}\text{FN}_6\text{O}_2 + \text{H}$ ] $^+$ ; HPLC (Method B) 96.7% (AUC),  $t_R$  = 7.19 min; Chiral SFC (ChiralPak OD-H, Method E) >99% (AUC),  $t_R$  = 3.50 min.

**(R)-N-(4-(4-Amino-2,7-dimethyl-7H-pyrrolo[2,3-d]pyrimidin-5-yl)-3-methylphenyl)-2-(3-cyano-5-fluorophenyl)-2-hydroxyacetamide (42):**

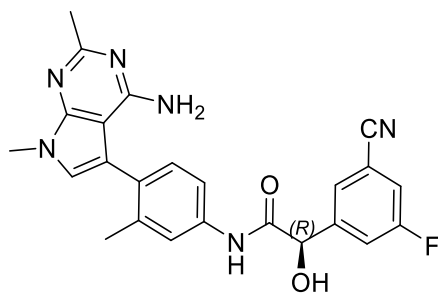

**42**

$^1\text{H}$  NMR (400 MHz,  $\text{DMSO}-d_6$ )  $\delta$  10.01 (s, 1H), 7.86 (d,  $J = 5.20$  Hz, 1H), 7.84–7.82 (m, 2H), 7.74 (dd,  $J = 1.60$ , 9.60 Hz, 1H), 7.66 (d,  $J = 2.00$  Hz, 1H), 7.15 (d,  $J = 8.00$  Hz, 1H), 7.02 (s, 1H), 6.84 (d,  $J = 4.0$  Hz, 1H), 5.68 (brs, 2H), 5.27 (d,  $J = 5.20$  Hz, 1H), 3.69 (s, 3H), 2.40 (s, 3H), 2.15 (s, 3H); ESI ( $m/z$ ): 445 [ $\text{C}_{24}\text{H}_{21}\text{FN}_6\text{O}_2 + \text{H}$ ] $^+$ ; HPLC (Method A) >99% (AUC),  $t_R = 3.25$  min; Chiral SFC (Chiralcel OD–H, Method E) >99% (AUC),  $t_R = 1.52$  min.

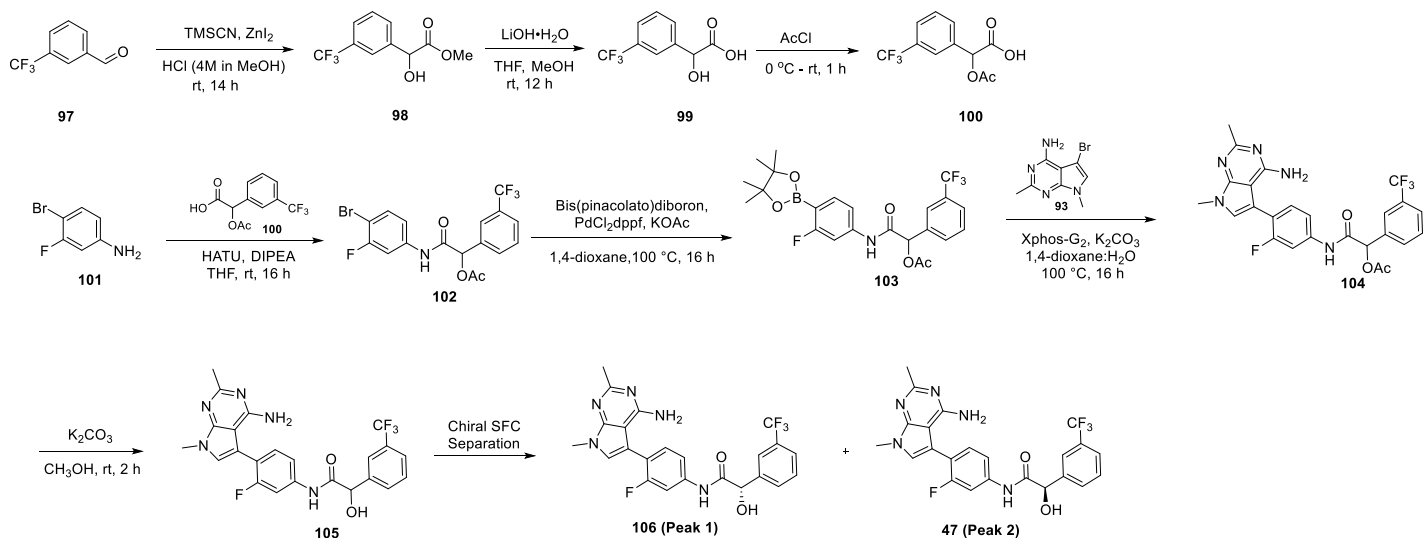

**Scheme S3. Synthesis of (S)-N-(4-(4-amino-2,7-dimethyl-7H-pyrrolo[2,3-d]pyrimidin-5-yl)-3-fluorophenyl)-2-hydroxy-2-(3-(trifluoromethyl)phenyl)acetamide (**106**) and (R)-N-(4-(4-amino-2,7-dimethyl-7H-pyrrolo[2,3-d]pyrimidin-5-yl)-3-fluorophenyl)-2-hydroxy-2-(3-(trifluoromethyl)phenyl)acetamide (**47**).**

#### Methyl 2-Hydroxy-2-(3-(trifluoromethyl)phenyl)acetate (**98**)

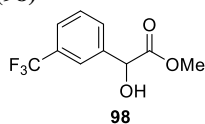

3-(Trifluoromethyl)benzaldehyde (**97**, 25.0 g, 143 mmol) was treated with zinc iodide (4.50 g, 14.3 mmol) at 0 °C followed by the drop wise addition of trimethylsilyl cyanide (17.0 mL, 172.0 mmol). The resulting reaction mixture was stirred at 0 °C for 2 h. After this time, hydrogen chloride (100 mL, 4N in methanol) was added at 0 °C. The reaction mixture was allowed to warm to room temperature and stirred for 12 h. After this, the reaction mixture was concentrated under reduced pressure. The crude product was treated with saturated sodium bicarbonate solution (100 mL) to adjust the pH to ~8, then ethyl acetate (200 mL) was added. The organic layer was washed with water (4 × 200 mL) followed by brine (200 mL). The organic layer was separated, dried over anhydrous sodium sulfate and concentrated under reduced pressure to afford methyl 2-hydroxy-2-(3-(trifluoromethyl)phenyl) acetate (**98**, 28 g, 83%) as a yellow liquid; ESI (*m/z*): 235 [C<sub>10</sub>H<sub>9</sub>F<sub>3</sub>O<sub>3</sub> + H]<sup>+</sup>.

#### 2-Hydroxy-2-(3-(trifluoromethyl)phenyl)acetic acid (**99**)

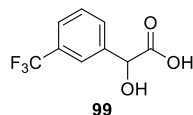

To a stirred solution of methyl 2-hydroxy-2-(3-(trifluoromethyl)phenyl)acetate (**98**, 28.0 g, 119 mmol) in tetrahydrofuran (70 mL), water (20 mL) and methanol (50 mL) was added lithium hydroxide hydrate (6.00 g, 143 mmol). The reaction mixture was stirred at room temperature for 12 h. After this time, the reaction mixture was concentrated under reduced pressure and diluted with water (100 mL). The aqueous mixture was washed with ethyl acetate (200 mL). The aqueous layer was acidified with hydrochloric acid (2N) to a pH of ~2 and extracted with ethyl acetate (2 × 150 mL). The Combined organic layers were dried over anhydrous sodium sulfate and concentrated under reduced pressure to afford 2-hydroxy-2-(3-(trifluoromethyl)phenyl)acetic acid (**99**, 25.00 g, 95%) as a colorless liquid. ESI (*m/z*): 219 [C<sub>9</sub>H<sub>7</sub>F<sub>3</sub>O<sub>3</sub> - H]<sup>-</sup>.

#### 2-Acetoxy-2-(3-(trifluoromethyl)phenyl)acetic acid (**100**)

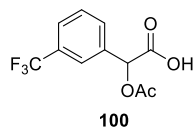

Acetyl chloride (50 mL) was treated with 2-hydroxy-2-(3-(trifluoromethyl)phenyl)acetic acid (**99**, 25.0 g, 113 mmol) at 0 °C portion wise over a period of 30 min. The reaction mixture was allowed to warm at room temperature and stirred for 1 h. After this time, the reaction mixture was concentrated under reduced pressure and co-distilled with hexanes to afford 2-acetoxy-2-(3-(trifluoromethyl)phenyl)acetic acid

(**100**, 21.00 g, 70%) as a white solid.  $^1\text{H}$  NMR (400 MHz, DMSO- $d_6$ )  $\delta$  7.80 (t,  $J$  = 8.0 Hz, 3H), 7.68 (t,  $J$  = 8.0 Hz, 1H), 6.00 (s, 1H), 2.15 (s, 3H); ESI ( $m/z$ ): 262 [ $\text{C}_{11}\text{H}_9\text{F}_3\text{O}_4 + \text{H}$ ] $^+$ .

**2-((4-Bromo-3-fluoro phenyl)amino)-2-oxo-1-(3-(trifluoro methyl)phenyl)ethyl acetate (**102**)**

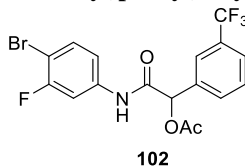

To a stirred solution of 4-bromo-3-fluoroaniline (**101**, 0.25 g, 1.3 mmol) and 2-acetoxy-2-(3-(trifluoromethyl)phenyl)acetic acid (**100**, 0.379 g, 1.45 mmol) in tetrahydrofuran (10 mL) was added *N,N*-diisopropylethylamine (0.339 g, 2.63 mmol) followed by 1-[bis(dimethylamino)methylene]-1*H*-1,2,3-triazolo[4,5-*b*]pyridinium 3-oxide hexafluorophosphate (HATU) (0.60 g, 1.6 mmol) at 0 °C. The reaction mixture was allowed to warm to room temperature and stirred for 16 h. After this time, the reaction mixture was cooled to 0 °C, diluted with water (20 mL), and extracted with ethyl acetate (2  $\times$  20 mL). The organic layer was separated, washed with water (20 mL) and brine solution (20 mL), dried over anhydrous sodium sulfate and concentrated under reduced pressure. The crude material was purified by combi flash column chromatography (30% ethyl acetate/hexanes as an eluent) to afford 2-((4-bromo-3-fluorophenyl)amino)-2-oxo-1-(3-(trifluoromethyl)phenyl)ethyl acetate (**102**, 0.35 g, 62%) as pale-yellow solid. ESI ( $m/z$ ): 434 [ $\text{C}_{17}\text{H}_{12}\text{BrF}_4\text{NO}_3 + \text{H}$ ] $^+$ .

**2-((3-Fluoro-4-(4,4,5,5-tetramethyl-1,3,2-dioxaborolan-2-yl)phenyl)amino)-2-oxo-1-(3-(trifluoromethyl)phenyl)ethyl acetate (**103**)**

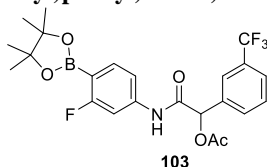

A mixture of 2-((4-bromo-3-fluorophenyl)amino)-2-oxo-1-(3-(trifluoromethyl)phenyl)ethyl acetate (**102**, 0.32 g, 0.74 mmol), bis(pinacolato)diboron (0.207 g, 0.814 mmol), and potassium acetate (0.218 g, 2.22 mmol) in 1,4-dioxane (6.5 mL) was degassed with argon for 10 min. Then, (1,1'-bis(diphenylphosphino)ferrocene)palladium(II) dichloride (PdCl<sub>2</sub>dppf) (0.032 g, 0.044 mmol) was added, and the resulting reaction mixture was heated at 90 °C for 16 h. After this time, the reaction mixture was cooled to room temperature, passed through a bed of diatomaceous earth and washed with methylene chloride (3  $\times$  10 mL). The filtrate was washed with water (2  $\times$  10 mL) and brine solution (2  $\times$  10 mL). The organic layer was separated, dried over anhydrous sodium sulfate and concentrated under reduced pressure. The crude product was purified by combi flash column chromatography (25% ethyl acetate/hexanes an eluent) to afford 2-((3-fluoro-4-(4,4,5,5-tetramethyl-1,3,2-dioxaborolan-2-yl)phenyl)amino)-2-oxo-1-(3-(trifluoromethyl)phenyl)ethyl acetate (**103**, 0.31 g, 87%) as a viscous mass. ESI ( $m/z$ ): 482 [ $\text{C}_{23}\text{H}_{24}\text{BF}_4\text{NO}_5 + \text{H}$ ] $^+$ .

**2-((4-(4-Amino-2,7-dimethyl-7*H*-pyrrolo[2,3-*d*]pyrimidin-5-yl)-3-fluorophenyl)amino)-2-oxo-1-(3-(trifluoromethyl)phenyl)ethyl acetate (**104**)**

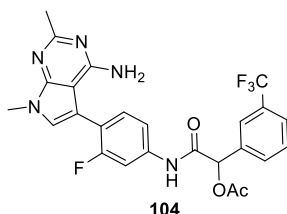

To a stirred solution of 5-bromo-2,7-dimethyl-7*H*-pyrrolo[2,3-*d*]pyrimidin-4-amine (**93**, 0.12 g, 0.50 mmol) in 1,4-dioxane (2 mL) and water (1 mL) were added 2-((3-fluoro-4-(4,4,5,5-tetramethyl-1,3,2-dioxaborolan-2-yl)phenyl)amino)-2-oxo-1-(3-(trifluoromethyl)phenyl)ethyl acetate (**103**, 0.263 g, 0.547 mmol) followed by potassium carbonate (0.274 g, 1.988 mmol). The resulting mixture was purged with argon for 10 min. Then, [2-(2-aminophenyl)phenyl]-chloro-palladium dicyclohexyl-[3-(2,4,6-triisopropylphenyl)phenyl]phosphane (XPhos-Pd-G<sub>2</sub>) (0.023 g, 0.029 mmol) was added, and the mixture was purged with Argon for 10 min. The reaction mixture was heated at 100 °C for 16 h. After this time, the reaction mixture was allowed to cool to room temperature, filtered through a bed of diatomaceous earth and washed with ethyl acetate (10 mL). The filtrates were combined and washed with water (10 mL) and brine solution (10 mL). The organic layer was separated, dried over anhydrous sodium sulfate and concentrated under reduced pressure. The crude product was purified by combi flash column chromatography (3% methanol/methylene chloride as an eluent) to afford 2-((4-(4-amino-2,7-dimethyl-7*H*-pyrrolo[2,3-*d*]pyrimidin-5-yl)-3-fluorophenyl)amino)-2-oxo-1-(3-(trifluoromethyl)phenyl)ethyl acetate (**104**, 0.17 g, 66%) as pale-yellow solid. ESI ( $m/z$ ): 516 [ $\text{C}_{25}\text{H}_{21}\text{F}_4\text{N}_5\text{O}_3 + \text{H}$ ] $^+$ .

(*S*)-*N*-(4-(4-Amino-2,7-dimethyl-7*H*-pyrrolo[2,3-*d*]pyrimidin-5-yl)-3-fluorophenyl)-2-hydroxy-2-(3-(trifluoromethyl)phenyl)acetamide (**106**) and (*R*)-*N*-(4-(4-Amino-2,7-dimethyl-7*H*-pyrrolo[2,3-*d*]pyrimidin-5-yl)-3-fluorophenyl)-2-hydroxy-2-(3-(trifluoromethyl)phenyl)acetamide (**47**)

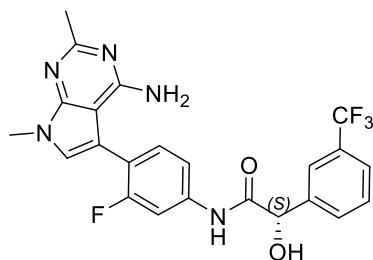

**106**

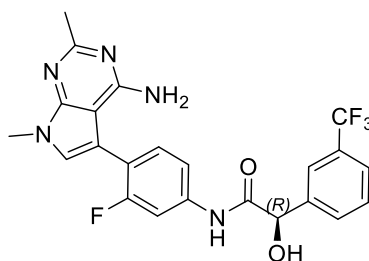

**47**

To a stirred solution of 2-((4-(4-amino-2,7-dimethyl-7H-pyrrolo[2,3-d]pyrimidin-5-yl)-3-fluorophenyl)amino)-2-oxo-1-(3-(trifluoromethyl)phenyl)ethyl acetate (**104**, 0.17 g, 0.33 mmol) in methanol (3.4 mL) was added potassium carbonate (0.91 g, 0.66 mmol), and the resulting reaction mixture was stirred at ambient temperature for 2 h under argon. After this time, the reaction mixture was concentrated under vacuum. The resulting crude material was diluted with methylene chloride (10 mL) and water (10 mL). The organic layer was separated, dried over anhydrous sodium sulfate and concentrated under reduced pressure to afford a pale yellow solid, which was purified by reverse phase column chromatography (acetonitrile 45–50% in water an eluent) to afford racemic *N*-(4-(4-amino-2,7-dimethyl-7H-pyrrolo[2,3-d]pyrimidin-5-yl)-3-fluorophenyl)-2-hydroxy-2-(3-(trifluoromethyl)phenyl)acetamide (**105**, 0.14 g) as a pale-yellow solid.  $^1\text{H}$  NMR (400 MHz, DMSO- $d_6$ )  $\delta$  10.34 (s, 1H), 7.91 (s, 1H), 7.83 (d,  $J$  = 8.00 Hz, 1H), 7.79 (dd,  $J$  = 4.00, 12.00 Hz, 1H), 7.69 (d,  $J$  = 8.00 Hz, 2H), 7.59–7.64 (m, 1H), 7.30 (t,  $J$  = 8.80 Hz, 1H), 7.17 (s, 1H), 6.82 (s, 1H), 5.92 (s, 2H), 5.29 (s, 1H), 3.69 (s, 3H), 2.40 (s, 3H); ESI ( $m/z$ ): 474 [ $\text{C}_{23}\text{H}_{19}\text{F}_4\text{N}_5\text{O}_2 + \text{H}$ ] $^+$ .

The mixture of enantiomers (0.14 g) was separated into two pure enantiomers by SFC (supercritical fluid chromatography) (Chiralcel OJ-H column, 0.3% DEA in methanol in  $\text{CO}_2$ , 40 °C temperature).

**106 (Peak 1)** (0.038 g) as an off-white solid:  $^1\text{H}$  NMR (400 MHz, DMSO- $d_6$ )  $\delta$  10.33 (s, 1H), 7.90 (s, 1H), 7.83 (d,  $J$  = 8.00 Hz, 1H), 7.79 (dd,  $J$  = 4.00, 12.00 Hz, 1H), 7.69 (d,  $J$  = 8.00 Hz, 2H), 7.59–7.64 (m, 1H), 7.30 (t,  $J$  = 8.00 Hz, 1H), 7.17 (s, 1H), 6.80 (s, 1H), 5.90 (s, 2H), 5.20 (s, 1H), 3.69 (s, 3H), 2.40 (s, 3H); ESI ( $m/z$ ): 474 [ $\text{C}_{23}\text{H}_{19}\text{F}_4\text{N}_5\text{O}_2 + \text{H}$ ] $^+$ ; HPLC (Method B) >99% (AUC),  $t_R$  = 8.65 min; Chiral SFC (Chiralcel OJ-H, Method C) 97.2% (AUC),  $t_R$  = 1.49 min.

**47 (Peak 2)** (0.045 g) as an off-white solid.  $^1\text{H}$  NMR (400 MHz, DMSO- $d_6$ )  $\delta$  10.33 (s, 1H), 7.90 (s, 1H), 7.83 (d,  $J$  = 8.00 Hz, 1H), 7.79 (dd,  $J$  = 4.00, 12.00 Hz, 1H), 7.69 (d,  $J$  = 8.00 Hz, 2H), 7.59–7.64 (m, 1H), 7.30 (t,  $J$  = 8.00 Hz, 1H), 7.17 (s, 1H), 6.80 (s, 1H), 5.90 (s, 2H), 5.20 (s, 1H), 3.69 (s, 3H), 2.40 (s, 3H); ESI ( $m/z$ ): 474 [ $\text{C}_{23}\text{H}_{19}\text{F}_4\text{N}_5\text{O}_2 + \text{H}$ ] $^+$ ; HPLC (Method B) >99% (AUC),  $t_R$  = 8.65 min; Chiral SFC (Chiralcel OJ-H, Method C) 97.6% (AUC),  $t_R$  = 1.22 min.

The following compounds were prepared by following the same procedure for synthesizing **47**:

**(R)-N-(4-(4-Amino-2,7-dimethyl-7H-pyrrolo[2,3-d]pyrimidin-5-yl)-3-methylphenyl)-2-hydroxy-2-(5-(trifluoromethyl)pyridin-3-yl)acetamide (45)**

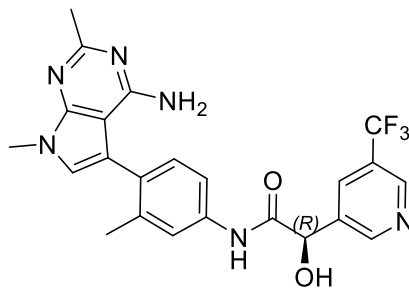

**45**

$^1\text{H}$  NMR (400 MHz, DMSO- $d_6$ )  $\delta$  10.10 (s, 1H), 9.03 (d,  $J$  = 1.20 Hz, 1H), 8.95 (d,  $J$  = 1.20 Hz, 1H), 8.29 (s, 1H), 7.63 (s, 1H), 7.60 (dd,  $J$  = 2.00, 8.40 Hz, 1H), 7.03 (s, 1H), 7.16 (d,  $J$  = 8.40 Hz, 1H), 6.93 (d,  $J$  = 5.20 Hz, 1H), 5.62 (brs, 2H), 5.40 (d,  $J$  = 4.80 Hz, 1H), 3.69 (s, 3H), 2.40 (s, 3H), 2.15 (s, 3H); ESI ( $m/z$ ): 471 [ $\text{C}_{23}\text{H}_{21}\text{F}_3\text{N}_6\text{O}_2 + \text{H}$ ] $^+$ ; HPLC (Method A) 97% (AUC),  $t_R$  = 3.04 min; Chiral SFC (Chiralcel OX-H, Method B) 96.5% (AUC),  $t_R$  = 1.93 min.

**(R)-N-(4-(4-Amino-2,7-dimethyl-7H-pyrrolo[2,3-d]pyrimidin-5-yl)-3-fluorophenyl)-2-(3-fluorophenyl)-2-hydroxyacetamide (46)**

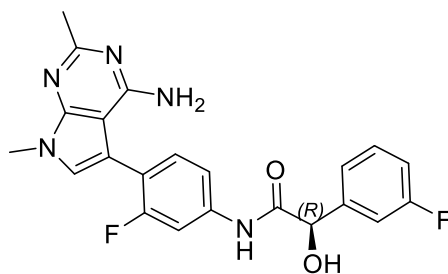

**46**

$^1\text{H}$  NMR (400 MHz,  $\text{DMSO}-d_6$ )  $\delta$  10.26 (s, 1H), 7.80 (dd,  $J = 2.00, 12.40$  Hz, 1H), 7.61 (dd,  $J = 2.00, 8.40$  Hz, 1H), 7.45–7.28 (m, 4H), 7.17–7.12 (m, 2H), 6.69 (d,  $J = 4.40$  Hz, 1H), 5.94 (brs, 2H), 5.18 (d,  $J = 4.80$  Hz, 1H), 3.69 (s, 3H), 2.41 (s, 3H); ESI ( $m/z$ ): 424 [ $\text{C}_{22}\text{H}_{19}\text{F}_2\text{N}_5\text{O}_2 + \text{H}$ ] $^+$ ; HPLC (Method B) 96.3% (AUC),  $t_R = 8.06$  min; Chiral SFC (Chiralcel OX-H, Method B) 98.0% (AUC),  $t_R = 3.65$  min.

**(R)-N-(4-(4-Amino-2,7-dimethyl-7H-pyrrolo[2,3-d]pyrimidin-5-yl)-3-fluorophenyl)-2-(3-chlorophenyl)-2-hydroxyacetamide (48)**

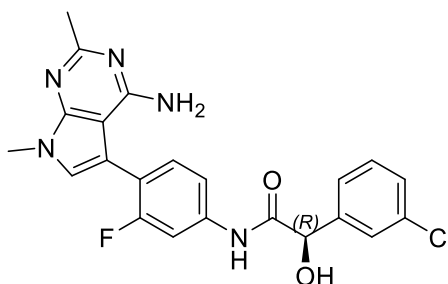

**48**

$^1\text{H}$  NMR (400 MHz,  $\text{DMSO}-d_6$ )  $\delta$  10.24 (brs, 1H), 7.79 (dd,  $J = 2.00, 12.40$  Hz, 1H), 7.61–7.59 (m, 2H), 7.49–7.47 (m, 1H), 7.42–7.35 (m, 2H), 7.30 (t,  $J = 8.00$  Hz, 1H), 7.16 (s, 1H), 6.69 (brs, 1H), 5.89 (brs, 2H), 5.17 (s, 1H), 3.69 (s, 3H), 2.40 (s, 3H); ESI ( $m/z$ ): 440 [ $\text{C}_{22}\text{H}_{19}\text{ClFN}_5\text{O}_2 + \text{H}$ ] $^+$ ; HPLC (Method B) >99% (AUC),  $t_R = 8.32$  min; Chiral SFC (Chiralcel OJ-H, Method C) >99% (AUC),  $t_R = 2.51$  min.

**(R)-N-(4-(4-Amino-2,7-dimethyl-7H-pyrrolo[2,3-d]pyrimidin-5-yl)-3-fluorophenyl)-2-hydroxy-2-(*m*-tolyl)acetamide (49)**

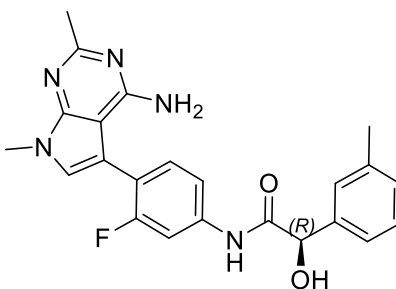

**49**

$^1\text{H}$  NMR (400 MHz,  $\text{DMSO}-d_6$ )  $\delta$  10.17 (s, 1H), 7.80 (d,  $J = 12.40$  Hz, 1H), 7.61 (d,  $J = 8.80$  Hz, 1H), 7.33–7.24 (m, 4H), 7.11 (d,  $J = 6.8$  Hz, 1H), 7.11 (d,  $J = 6.80$  Hz, 1H), 6.47 (d,  $J = 4.40$  Hz, 1H), 5.89 (brs, 2H), 5.08 (d,  $J = 4.80$  Hz, 1H), 3.69 (s, 3H), 2.40 (s, 3H), 2.31 (s, 3H); ESI ( $m/z$ ): 420 [ $\text{C}_{23}\text{H}_{22}\text{FN}_5\text{O}_2 + \text{H}$ ] $^+$ ; HPLC (Method B) >99% (AUC),  $t_R = 8.11$  min; Chiral SFC (Chiralcel OJ-H, Method C) >99% (AUC),  $t_R = 2.07$  min.

**(R)-N-(4-(4-Amino-2,7-dimethyl-7H-pyrrolo[2,3-d]pyrimidin-5-yl)-3-fluorophenyl)-2-(3-ethylphenyl)-2-hydroxyacetamide (50)**

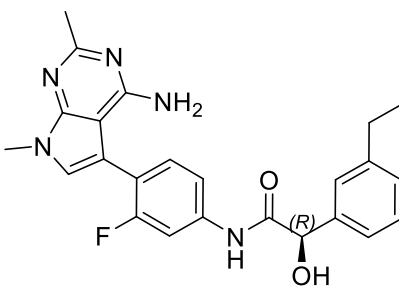

**50**

$^1\text{H}$  NMR (400 MHz,  $\text{DMSO-}d_6$ )  $\delta$  10.19 (s, 1H), 7.81 (d,  $J = 14.40$  Hz, 1H), 7.61 (d,  $J = 10.40$  Hz, 1H), 7.37 (s, 1H), 7.32–7.27 (m, 3H), 7.15 (dd,  $J = 7.60$  Hz, 2H), 5.89 (brs, 2H), 5.09 (d, 1H), 3.69 (s, 3H), 2.61 (m, 2H), 2.40 (s, 3H), 1.19 (t,  $J = 7.60$  Hz, 3H); ESI ( $m/z$ ): 434  $[\text{C}_{24}\text{H}_{24}\text{FN}_5\text{O}_2 + \text{H}]^+$ ; HPLC (Method B) 97.7% (AUC),  $t_R = 8.99$  min; Chiral SFC (Chiralcel OJ-H, Method C) >99% (AUC),  $t_R = 2.52$  min.

**(R)-N-(4-(4-Amino-2,7-dimethyl-7H-pyrrolo[2,3-d]pyrimidin-5-yl)-3-fluorophenyl)-2-(3-fluoro-5-(trifluoromethyl)phenyl)-2-hydroxyacetamide (51)**

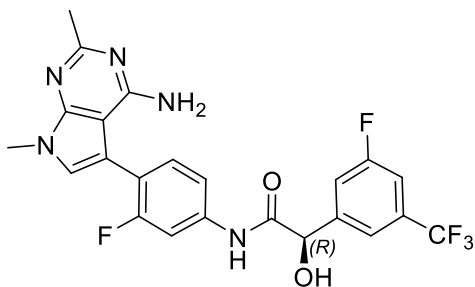

**51**

$^1\text{H}$  NMR (400 MHz,  $\text{DMSO-}d_6$ )  $\delta$  10.32 (s, 1H), 7.79–7.76 (m, 2H), 7.69–7.58 (m, 3H), 7.31 (t,  $J = 8.00$  Hz, 1H), 7.16 (s, 1H), 6.95 (s, 1H), 5.89 (s, 2H), 5.33 (s, 1H), 3.69 (s, 3H), 2.40 (s, 3H); ESI ( $m/z$ ): 492  $[\text{C}_{23}\text{H}_{18}\text{F}_5\text{N}_5\text{O}_2 + \text{H}]^+$ ; HPLC (Method B) 98.5% (AUC),  $t_R = 8.87$  min; Chiral SFC (Chiralcel OX-H, Method B) 97.9% (AUC),  $t_R = 1.71$  min.

**(R)-N-(4-(4-Amino-2,7-dimethyl-7H-pyrrolo[2,3-d]pyrimidin-5-yl)-3-fluorophenyl)-2-(3-fluoro-5-methylphenyl)-2-hydroxyacetamide (52)**

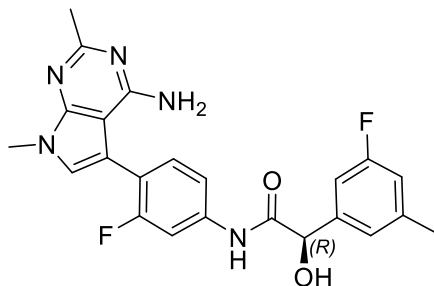

**52**

$^1\text{H}$ -NMR (400 MHz,  $\text{DMSO-}d_6$ )  $\delta$ : 10.24 (brs, 1H), 7.79 (dd,  $J = 2.00$ , 12.40 Hz, 1H), 7.60 (dd,  $J = 2.00$ , 8.40 Hz, 1H), 7.30 (t,  $J = 8.80$  Hz, 1H), 7.18–7.12 (m, 3H), 6.96 (d,  $J = 10.00$  Hz, 1H), 6.69 (brs, 1H), 5.89 (brs, 2H), 5.12 (s, 1H), 3.69 (s, 3H), 2.40 (s, 3H), 2.33 (s, 3H); ESI ( $m/z$ ): 438  $[\text{C}_{23}\text{H}_{21}\text{F}_2\text{N}_5\text{O}_2 + \text{H}]^+$ ; HPLC (Method B) >99% (AUC),  $t_R = 8.29$  min; Chiral SFC (Chiralcel OX-H, Method B) >99% (AUC),  $t_R = 4.29$  min.

**(R)-N-(4-(4-Amino-2,7-dimethyl-7H-pyrrolo[2,3-d]pyrimidin-5-yl)-3-chlorophenyl)-2-(3-fluorophenyl)-2-hydroxyacetamide (53)**



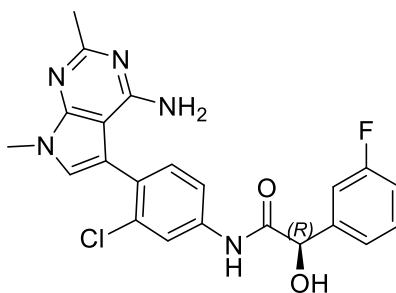

**53**

$^1\text{H}$  NMR 400 MHz,  $\text{DMSO-}d_6$ )  $\delta$  10.22 (s, 1H), 8.04 (d,  $J = 2.0$  Hz, 1H), 7.73 (dd,  $J = 8.0, 4.0$  Hz, 1H), 7.44–7.30 (m, 4H), 7.13 (s, 2H), 6.67 (d,  $J = 4.0$  Hz, 1H), 5.71 (brs, 2H), 5.18 (d,  $J = 4.0$  Hz, 1H), 3.68 (s, 3H), 2.39 (s, 3H); ESI ( $m/z$ ): 440 [ $\text{C}_{22}\text{H}_{19}\text{ClFN}_5\text{O}_2 + \text{H}$ ] $^+$ ; HPLC (Method B) 94.5% (AUC),  $t_R = 8.33$  min.; Chiral SFC (Chiralcel OJ-H, Method C) 97.2% (AUC),  $t_R = 6.39$  min.

**(R)-N-(4-(4-Amino-2,7-dimethyl-7H-pyrrolo[2,3-d]pyrimidin-5-yl)-3-chlorophenyl)-2-hydroxy-2-(3-(trifluoromethyl)phenyl)acetamide (54)**

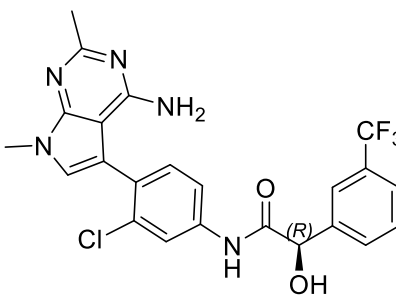

**54**

$^1\text{H}$  NMR (400 MHz,  $\text{DMSO-}d_6$ )  $\delta$  10.3 (brs, 1H), 8.05 (d,  $J = 4.0$  Hz, 1H), 7.90 (s, 1H), 7.83 (d,  $J = 8.0$  Hz, 1H), 7.74–7.64 (m, 3H), 7.31 (d,  $J = 8.0$  Hz, 1H), 7.12 (s, 1H), 6.81 (brs, 1H), 5.81 (brs, 2H), 5.28 (s, 1H), 3.68 (s, 3H), 2.39 (s, 3H); ESI ( $m/z$ ): 490 [ $\text{C}_{23}\text{H}_{19}\text{ClF}_3\text{N}_5\text{O}_2 + \text{H}$ ] $^+$ ; HPLC (Method B) 98.7% (AUC),  $t_R = 8.77$  min; Chiral SFC (ChiralPak OD-H, Method E) 98.2% (AUC),  $t_R = 3.15$  min.

**(R)-N-(4-(4-Amino-2,7-dimethyl-7H-pyrrolo[2,3-d]pyrimidin-5-yl)-3-chlorophenyl)-2-(3-chlorophenyl)-2-hydroxyacetamide (55)**

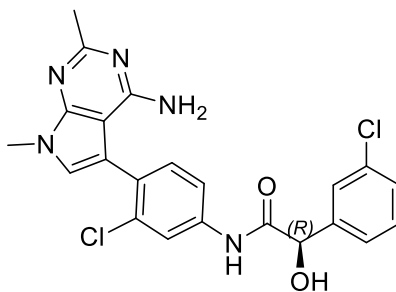

**55**

$^1\text{H}$  NMR (400 MHz,  $\text{DMSO-}d_6$ )  $\delta$  10.26 (s, 1H), 8.05 (d,  $J = 2.00$  Hz, 1H), 7.73 (dd,  $J = 2.00, 8.40$  Hz, 1H), 7.59 (s, 1H), 7.50–7.48 (m, 1H), 7.43–7.37 (m, 2H), 7.31 (d,  $J = 8.40$  Hz, 1H), 7.13 (s, 1H), 6.71 (d,  $J = 4.40$  Hz, 1H), 5.76 (brs, 2H), 5.17 (d,  $J = 4.40$  Hz, 1H), 3.69 (s, 3H), 2.40 (s, 3H); ESI ( $m/z$ ): 456 [ $\text{C}_{22}\text{H}_{19}\text{Cl}_2\text{N}_5\text{O}_2 + \text{H}$ ] $^+$ ; HPLC (Method B) 98.6% (AUC),  $t_R = 9.03$  min; Chiral SFC (Chiralcel OX-H, Method B) >99% (AUC),  $t_R = 6.40$  min.

**(R)-N-(4-(4-Amino-2,7-dimethyl-7H-pyrrolo[2,3-d]pyrimidin-5-yl)-3-chlorophenyl)-2-hydroxy-2-(*m*-tolyl)acetamide (56)**

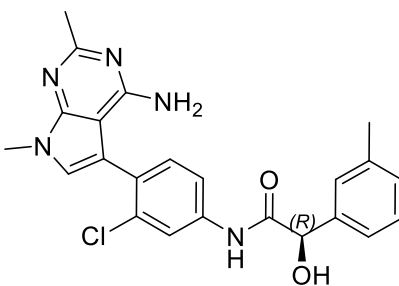

**56**

$^1\text{H}$  NMR (400 MHz,  $\text{DMSO}-d_6$ )  $\delta$  10.19 (s, 1H), 8.07 (d,  $J = 2.00$  Hz, 1H), 7.74 (dd,  $J = 2.40, 8.60$  Hz, 1H), 7.34–7.32 (m, 4H), 7.12 (d,  $J = 2.40$  Hz, 2H), 6.49 (d,  $J = 4.40$  Hz, 1H), 5.76 (s, 2H), 5.08 (s, 1H), 3.69 (s, 3H), 2.40 (s, 3H), 2.32 (s, 3H); ESI ( $m/z$ ): 436 [ $\text{C}_{23}\text{H}_{22}\text{ClN}_5\text{O}_2 + \text{H}$ ] $^+$ ; HPLC (Method B) 97.21% (AUC),  $t_R = 8.29$  min; Chiral SFC (Chiralcel OJ-H, Method C) 97.98% (AUC),  $t_R = 2.93$  min.

**(R)-N-(4-(4-Amino-2,7-dimethyl-7H-pyrrolo[2,3-d]pyrimidin-5-yl)-3-chlorophenyl)-2-(3-ethylphenyl)-2-hydroxyacetamide (57)**

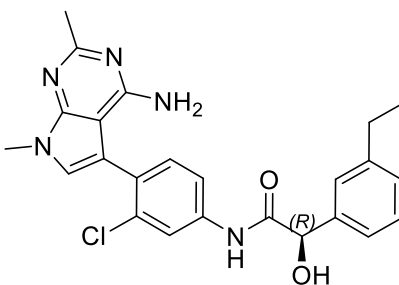

**57**

$^1\text{H}$  NMR (400 MHz,  $\text{DMSO}-d_6$ )  $\delta$  10.18 (s, 1H), 8.06 (d,  $J = 2.00$  Hz, 1H), 7.74 (dd,  $J = 10.40$  Hz, 1H), 7.35 (d,  $J = 14.00$  Hz, 1H), 7.27 (dd,  $J = 18.80$  Hz, 3H), 7.16–7.12 (m, 2H), 6.47 (s, 1H), 5.74 (s, 2H), 5.10 (s, 1H), 3.69 (s, 3H), 2.67–2.59 (m, 2H), 2.40 (s, 3H), 1.19 (t,  $J = 7.60$  Hz, 3H); ESI ( $m/z$ ): 450 [ $\text{C}_{24}\text{H}_{24}\text{ClN}_5\text{O}_2 + \text{H}$ ] $^+$ ; HPLC (Method B) >99 (AUC),  $t_R = 9.15$  min; Chiral SFC (Chiralcel OD-H, Method F) 95.7% (AUC),  $t_R = 6.18$  min.

**(R)-N-(4-(4-Amino-2,7-dimethyl-7H-pyrrolo[2,3-d]pyrimidin-5-yl)-3-(trifluoromethyl)phenyl)-2-(3-fluorophenyl)-2-hydroxyacetamide (58)**

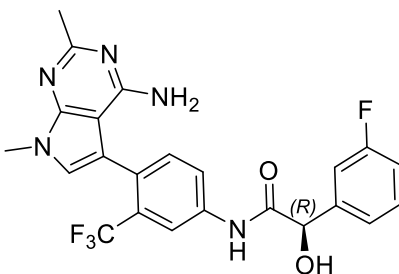

**58**

$^1\text{H}$  NMR (400 MHz,  $\text{DMSO}-d_6$ )  $\delta$  10.41 (s, 1H), 8.32 (d,  $J = 1.60$  Hz, 1H), 8.03 (d,  $J = 8.40$  Hz, 1H), 7.45–7.34 (m, 4H), 7.17–7.12 (m, 1H), 7.03 (s, 1H), 6.72 (d,  $J = 4.80$  Hz, 1H), 5.67 (brs, 2H), 5.20 (d,  $J = 4.40$  Hz, 1H), 3.68 (s, 3H), 2.40 (s, 3H); ESI ( $m/z$ ): 474 [ $\text{C}_{23}\text{H}_{19}\text{F}_4\text{N}_5\text{O}_2 + \text{H}$ ] $^+$ ; HPLC (Method B) >99 % (AUC),  $t_R = 8.47$  min; Chiral SFC (Chiralcel OJ-H, Method C) >99% (AUC),  $t_R = 4.11$  min.

**(R)-N-(4-(4-Amino-2,7-dimethyl-7H-pyrrolo[2,3-d]pyrimidin-5-yl)-3-methoxyphenyl)-2-(3-fluorophenyl)-2-hydroxyacetamide (60)**

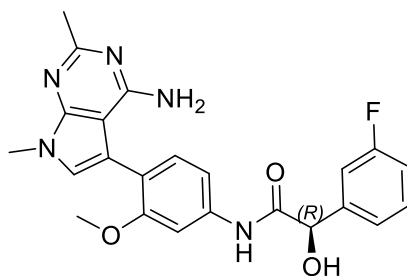

**60**

<sup>1</sup>H NMR (400 MHz, DMSO-*d*<sub>6</sub>) δ 10.06 (brs, 1H), 7.59 (d, *J* = 2.00 Hz, 1H), 7.44–7.34 (m, 4H), 7.16–7.11 (m, 2H), 7.01 (s, 1H), 6.65 (brs, 1H), 5.75 (brs, 2H), 5.17 (s, 1H), 3.70 (s, 3H), 3.66 (s, 3H), 2.38 (s, 3H); ESI (*m/z*): 436 [C<sub>23</sub>H<sub>22</sub>FN<sub>5</sub>O<sub>3</sub> + H]<sup>+</sup>; HPLC (Method B) 97.8% (AUC), *t*<sub>R</sub> = 8.07 min; Chiral SFC (Chiralcel OJ-H, Method C) 98.8% (AUC), *t*<sub>R</sub> = 4.05 min.

**(*R*)-*N*-(4-(4-Amino-2,7-dimethyl-7*H*-pyrrolo[2,3-*d*]pyrimidin-5-yl)-3-(trifluoromethoxy)phenyl)-2-(3-fluorophenyl)-2-hydroxyacetamide (61)**

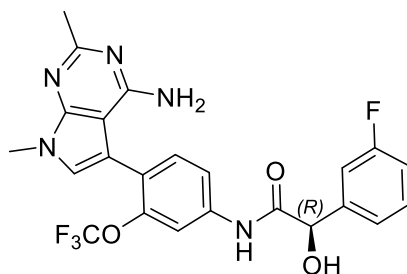

**61**

<sup>1</sup>H NMR (400 MHz, DMSO-*d*<sub>6</sub>) δ 10.35 (brs, 1H), 8.05 (s, 1H), 7.79 (dd, *J* = 1.60, 8.40 Hz, 1H), 7.45–7.34 (m, 4H), 7.17–7.11 (m, 2H), 6.68 (s, 1H), 5.81 (brs, 2H), 5.51 (d, *J* = 4.4 Hz, 1H), 3.69 (s, 3H), 2.40 (s, 3H); ESI (*m/z*): 490 [C<sub>23</sub>H<sub>19</sub>F<sub>4</sub>N<sub>5</sub>O<sub>3</sub> + H]<sup>+</sup>; HPLC (Method B) 98.0% (AUC), *t*<sub>R</sub> = 8.61 min; Chiral SFC (Chiralcel OJ-H, Method C) >99% (AUC), *t*<sub>R</sub> = 2.66 min.

**(*R*)-*N*-(4-(4-Amino-2,7-dimethyl-7*H*-pyrrolo[2,3-*d*]pyrimidin-5-yl)-2-fluoro-5-methylphenyl)-2-(3-fluorophenyl)-2-hydroxyacetamide (66)**

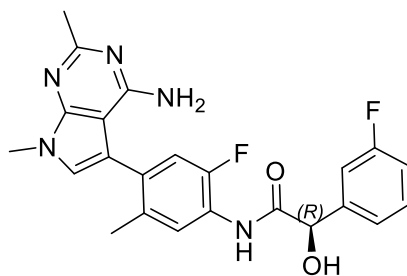

**66**

<sup>1</sup>H NMR (400 MHz, DMSO-*d*<sub>6</sub>) δ 9.64 (s, 1H), 7.82 (d, *J* = 8.40 Hz, 1H), 7.43–7.32 (m, 3H), 7.17–7.09 (m, 3H), 6.80 (brs, 1H), 5.73 (brs, 2H), 5.26 (s, 1H), 3.69 (s, 3H), 2.40 (s, 3H), 2.13 (s, 3H); ESI (*m/z*): 438 [C<sub>23</sub>H<sub>21</sub>F<sub>2</sub>N<sub>5</sub>O<sub>2</sub> + H]<sup>+</sup>; HPLC (Method B) 98.0% (AUC), *t*<sub>R</sub> = 8.17 min; Chiral SFC (Chiralpak IA, Method A) 98.8% (AUC), *t*<sub>R</sub> = 3.56 min.

***N*-(4-(4-Amino-2,7-dimethyl-7*H*-pyrrolo[2,3-*d*]pyrimidin-5-yl)-3-fluoro-5-methylphenyl)-2-(3-fluorophenyl)-2-hydroxyacetamide (67)**

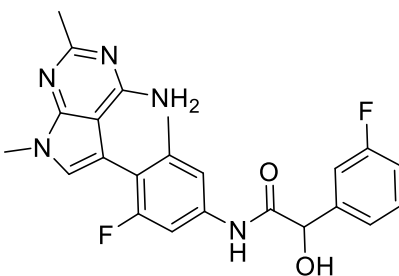

**67**

$^1\text{H}$  NMR (400 MHz, DMSO- $d_6$ )  $\delta$  10.13 (brs, 1H), 7.62–7.58 (m, 1H), 7.50 (s, 1H), 7.44–7.35 (m, 3H), 7.16–7.11 (m, 1H), 7.04 (s, 1H), 6.66–6.64 (m, 1H), 5.62 (brs, 2H), 5.16 (d,  $J$  = 4.80 Hz, 1H), 3.69 (s, 3H), 2.39 (s, 3H), 2.09 (s, 3H); ESI ( $m/z$ ): 438 [ $\text{C}_{23}\text{H}_{21}\text{F}_2\text{N}_5\text{O}_2 + \text{H}$ ] $^+$ ; HPLC (Method B) >99% (AUC),  $t_R$  = 8.15 min.

***N*-(4-(4-Amino-2,7-dimethyl-7H-pyrrolo[2,3-*d*]pyrimidin-5-yl)-3,5-dimethylphenyl)-2-(3-fluorophenyl)-2-hydroxyacetamide (68)**

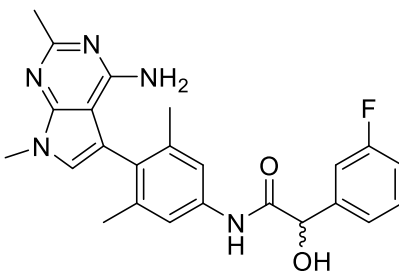

**68**

$^1\text{H}$  NMR (400 MHz, DMSO- $d_6$ )  $\delta$  9.87 (s, 1H), 7.50 (s, 2H), 7.44–7.33 (m, 3H), 7.13 (t,  $J$  = 7.60 Hz, 1H), 6.92 (s, 1H), 6.57 (d,  $J$  = 4.80 Hz, 1H), 5.42 (brs, 2H), 5.15 (d,  $J$  = 4.80 Hz, 1H), 3.70 (s, 3H), 2.39 (s, 3H), 1.99 (s, 6H); ESI ( $m/z$ ): 434 [ $\text{C}_{24}\text{H}_{24}\text{FN}_5\text{O}_2 + \text{H}$ ] $^+$ ; HPLC (Method B) 98.6% (AUC),  $t_R$  = 8.20 min.

***(R)*-N-(4-(4-Amino-2,7-dimethyl-7H-pyrrolo[2,3-*d*]pyrimidin-5-yl)-2-fluorophenyl)-2-(3-fluorophenyl)-2-hydroxyacetamide (69)**

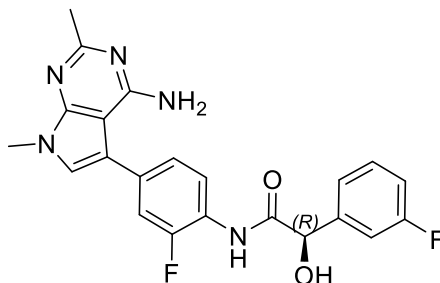

**69**

$^1\text{H}$  NMR (400 MHz, DMSO- $d_6$ )  $\delta$  9.69 (s, 1H), 7.91 (t,  $J$  = 8.40 Hz, 1H), 7.45–7.13 (m, 7H), 6.14 (brs, 1H), 6.07 (brs, 2H), 5.23 (s, 1H), 3.69 (s, 3H), 2.41 (s, 3H); ESI ( $m/z$ ): 424 [ $\text{C}_{22}\text{H}_{19}\text{F}_2\text{N}_5\text{O}_2 + \text{H}$ ] $^+$ ; HPLC (Method B) >99% (AUC),  $t_R$  = 8.00 min; Chiral SFC (Chiralcel OJ-H, Method C) >99% (AUC),  $t_R$  = 3.37 min.

***N*-(4-(4-Amino-2,7-dimethyl-7H-pyrrolo[2,3-*d*]pyrimidin-5-yl)-2,5-difluorophenyl)-2-(3-fluorophenyl)-2-hydroxyacetamide (71)**

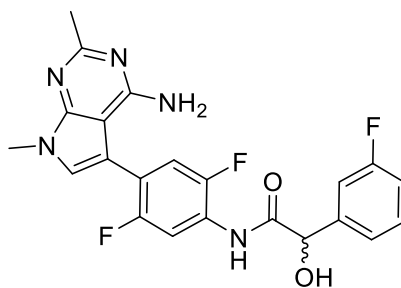

**71**

$^1\text{H}$  NMR (400 MHz,  $\text{DMSO-}d_6$ )  $\delta$  7.94–7.89 (m, 1H), 7.44–7.24 (m, 5H), 7.16–7.12 (m, 1H), 6.06 (brs, 2H), 5.29 (s, 1H), 3.69 (s, 3H), 2.40 (s, 3H); ESI (m/z): 442 [ $\text{C}_{22}\text{H}_{18}\text{F}_3\text{N}_5\text{O}_2 + \text{H}$ ] $^+$ ; HPLC (Method B) 98.9% (AUC),  $t_R = 8.23$  min.

**(R)-N-(5-(4-Amino-2,7-dimethyl-7H-pyrrolo[2,3-d]pyrimidin-5-yl)-6-methylpyridin-2-yl)-2-hydroxy-2-(3-(trifluoromethyl)phenyl)acetamide (73)**

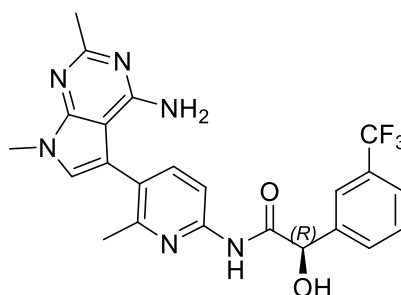

**73**

$^1\text{H}$  NMR (400 MHz,  $\text{DMSO-}d_6$ )  $\delta$  10.22 (s, 1H), 7.93–7.91 (m, 2H), 7.85 (d,  $J = 7.6$  Hz, 1H), 7.69–7.67 (m, 1H), 7.63–7.55 (m, 2H), 7.08 (s, 1H), 6.66 (d,  $J = 5.6$  Hz, 1H), 5.81 (brs, 2H), 5.40 (d,  $J = 5.2$  Hz, 1H), 3.68 (s, 3H), 2.39 (s, 3H), 2.34 (s, 3H); ESI (m/z): 471 [ $\text{C}_{23}\text{H}_{21}\text{F}_3\text{N}_6\text{O}_2 + \text{H}$ ] $^+$ ; HPLC (Method B) 98.8% (AUC),  $t_R = 7.71$  min; Chiral SFC (ChiralPak OD-H, Method E) >99% (AUC),  $t_R = 2.20$  min.

**(R)-N-(5-(4-Amino-2,7-dimethyl-7H-pyrrolo[2,3-d]pyrimidin-5-yl)-4-methylpyridin-2-yl)-2-(3-fluorophenyl)-2-hydroxyacetamide (74)**

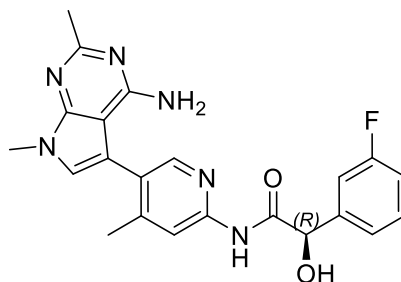

**74**

$^1\text{H}$ -NMR (400 MHz,  $\text{DMSO-}d_6$ )  $\delta$ : 10.04 (brs, 1H), 8.10 (s, 1H), 8.00 (s, 1H), 7.42–7.33 (m, 3H), 7.16–7.11 (m, 1H), 7.10 (s, 1H), 6.65 (brs, 1H), 5.82 (brs, 2H), 5.29 (s, 1H), 3.70 (s, 3H), 2.40 (s, 3H), 2.19 (s, 3H); ESI (m/z): 421 [ $\text{C}_{22}\text{H}_{21}\text{FN}_6\text{O}_2 + \text{H}$ ] $^+$ ; HPLC (Method B) 98.5% (AUC),  $t_R = 6.57$  min; Chiral SFC (Chiralcel OX-H, Method B) 95.4% (AUC),  $t_R = 7.95$  min.

**(R)-N-(5-(4-Amino-2,7-dimethyl-7H-pyrrolo[2,3-d]pyrimidin-5-yl)-4-methylpyridin-2-yl)-2-hydroxy-2-(3-(trifluoromethyl)phenyl)acetamide (75)**

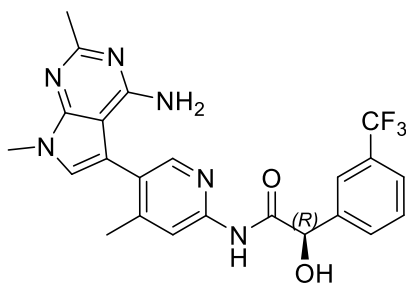

**75**

$^1\text{H}$  NMR (400 MHz,  $\text{DMSO}-d_6$ )  $\delta$  10.13 (s, 1H), 8.11 (s, 1H), 8.01 (s, 1H), 7.95 (s, 1H), 7.85 (d,  $J=8.00$  Hz, 1H), 7.68 (d,  $J=7.20$  Hz, 1H), 7.61 (d,  $J=8.0$  Hz, 1H), 7.10 (s, 1H), 6.74 (s, 1H), 5.81 (s, 2H), 5.40 (s, 1H), 3.70 (s, 3H), 2.40 (s, 3H), 2.19 (s, 3H); ESI (m/z): 471  $[\text{C}_{23}\text{H}_{21}\text{F}_3\text{N}_6\text{O}_2 + \text{H}]^+$ , HPLC (Method B) 96.6% (AUC),  $t_R = 7.127$  min; Chiral SFC (Chiralcel OX-H, Method B) 91.3% (AUC),  $t_R = 3.98$  min.

**(R)-N-(5-(4-Amino-2,7-dimethyl-7H-pyrrolo[2,3-d]pyrimidin-5-yl)-4-methylpyrimidin-2-yl)-2-(3-fluorophenyl)-2-hydroxyacetamide (76)**

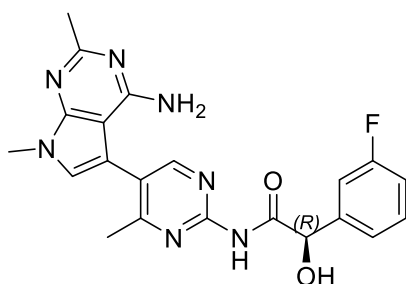

**76**

$^1\text{H}$  NMR (400 MHz,  $\text{DMSO}-d_6$ )  $\delta$  10.26 (s, 1H), 8.31 (s, 1H), 7.44–7.33 (m, 3H), 7.13–7.10 (m, 2H), 6.50 (d,  $J = 5.60$  Hz, 1H), 6.14 (brs, 2H), 5.31 (d,  $J = 5.20$  Hz, 1H), 3.69 (s, 3H), 2.39 (s, 3H), 2.32 (s, 3H); ESI (m/z): 422  $[\text{C}_{21}\text{H}_{20}\text{FN}_7\text{O}_2 + \text{H}]^+$ ; HPLC (Method B) 97.4% (AUC),  $t_R = 6.40$  min; Chiral SFC (Chiralcel OX-H, Method B) 84.3% (AUC),  $t_R = 6.19$  min.

## **HPLC Conditions**

### **Method A**

**Column:** XBridge BEH C18 2.5 $\mu\text{m}$ (2.1\*50mm)

**Total Flow:** 0.6mL/min

**Mobile phase-A:** 0.05% TFA in ACN

**Mobile phase-B:** 0.05% TFA in WATER

**Column Temperature:** Ambient

**Gradient** -% A: 0/10,1.5/10,5/70,7/95,8.5/95,8.6/10,10/10.

**Diluent:** Water: ACN (1:1) (% v /v)

**Channel Description:** PDA Spectrum

### **Method B**

**Column:** Eclipse Plus C18, 100 x 4.6 mm,3.5 $\mu\text{m}$ .

**Mobile Phase-A:** 0.05% TFA in Water.

**Mobile Phase-B:** 0.05% TFA in Acetonitrile

**Elution:** Time/%B-0/5, 2/5, 7/70, 10/95, 12/95, 12.1/5, 15/5

**Diluent:** ACN: Water (1:1) (%v/v)

**Flow:** 1.0 mL/min;

**Sample Temperature:** Ambient

**Column Temperature:** Ambient

**Detector:** DAD

### **Method C:**

**Column:** Polaris C18-A 100 x 3.0 mm, 2.6 $\mu\text{m}$

**Mobile Phase-A:** 0.05% TFA in Water

**Mobile Phase-B:** 0.05% TFA in Acetonitrile

**Elution:** Time/%B-0/5, 3/5, 6/90, 12/90, 12.1/5, 15/5

**Diluent:** ACN : Water (1:1) % v/v

**Flow:** 0.8 mL/min;

**Sampler Temperature:** Ambient

**Column Temperature:** Ambient

### **SFC Conditions**

#### **Method A**

Column: Chiralpak IA (4.6\*150 mm)5 $\mu$

Total Flow: 3g-30%

Mobile phase (A%): CO<sub>2</sub> (2.1g/min)

Mobile phase (B%): 0.3 % DEA in MeOH (0.9mL/min)

Column Temperature: 40°C

Detection: 240 nm

ABPR: 1500 psi

Diluent: MeOH

#### **Method B**

Column: Chiralcel OX-H (4.6\*150 mm)5 $\mu$

Total FLOW: 3g-30%

Mobile phase (A%): CO<sub>2</sub> (2.1g/min)

Mobile phase (B%): 0.3 % DEA in MeOH (0.9mL/min)

Column Temperature: 40°C

Detection: 240 nm

ABPR: 1500 psi

Diluent: MeOH

#### **Method C**

Column: Chiralcel OJ-H (4.6\*150 mm)5 $\mu$

Total FLOW: 3g-15%

Mobile phase (A%): CO<sub>2</sub> (2.55g/min)

Mobile phase (B%): 0.3 % DEA in MeOH (0.45mL/min)

Column Temperature: 40°C

Detection: 240 nm

ABPR: 1500 psi

Diluent: MeOH

**<sup>1</sup>H NMR (400 MHz, DMSO-d<sub>6</sub>)**

NAME IN-GPR-E-17-1  
EXPNO 3  
PROCNO 1  
Date\_ 20210310  
Time 8.20 h  
INSTRUM spect  
PROBHD Z104450\_0325 (   
PULPROG zg30  
TD 65536  
SOLVENT DMSO  
NS 16  
DS 2  
SWH 8012.820 Hz  
FIDRES 0.244532 Hz  
AQ 4.0894966 sec  
RG 322  
DW 62.400 usec  
DE 17.77 usec  
TE 298.3 K  
D1 1.00000000 sec  
TD0 1  
SF01 400.4274726 MHz  
NUC1 1H  
P0 3.33 usec  
P1 10.00 usec  
SI 65536  
SF 400.4250026 MHz  
WDW EM  
SSB 0  
LB 0.30 Hz  
GB 0  
PC 1.00

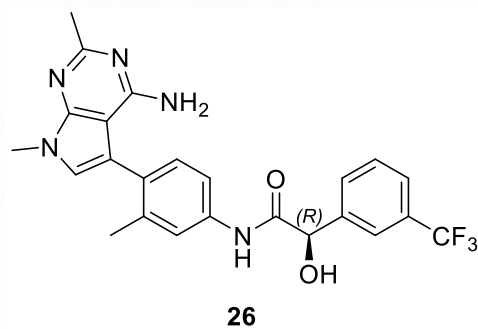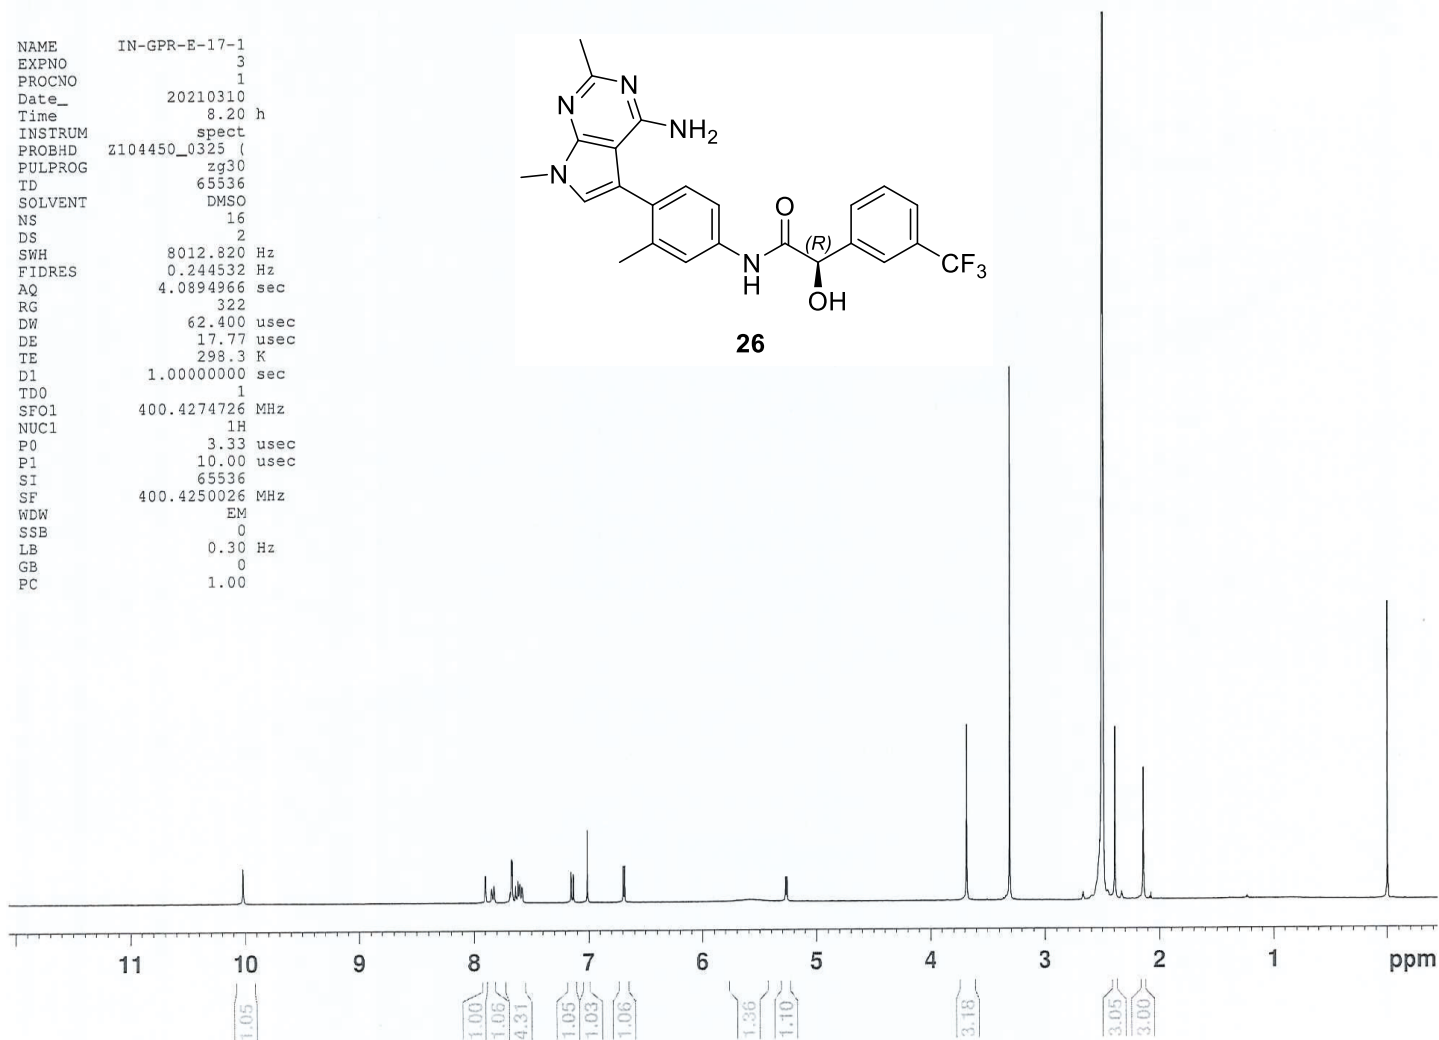



# <sup>1</sup>H NMR (400 MHz, DMSO-d<sub>6</sub>)

NAME IN-RRC-H-143-1  
EXPNO 4  
PROCNO 1  
Date\_ 20191115  
Time 9.26  
INSTRUM spect  
PROBHD 5 mm PABBO BB-  
PULPROG zg30  
TD 65536  
SOLVENT DMSO  
NS 16  
DS 2  
SWH 8223.685 Hz  
FIDRES 0.125483 Hz  
AQ 3.9846387 sec  
RG 161  
DW 60.800 usec  
DE 6.50 usec  
TE 298.3 K  
D1 1.0000000 sec  
TD0 1

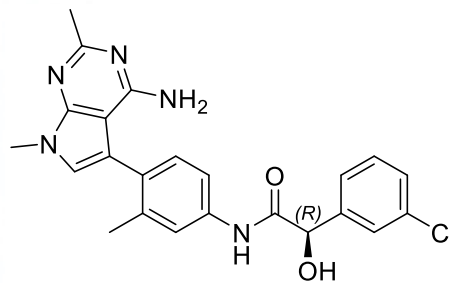

28

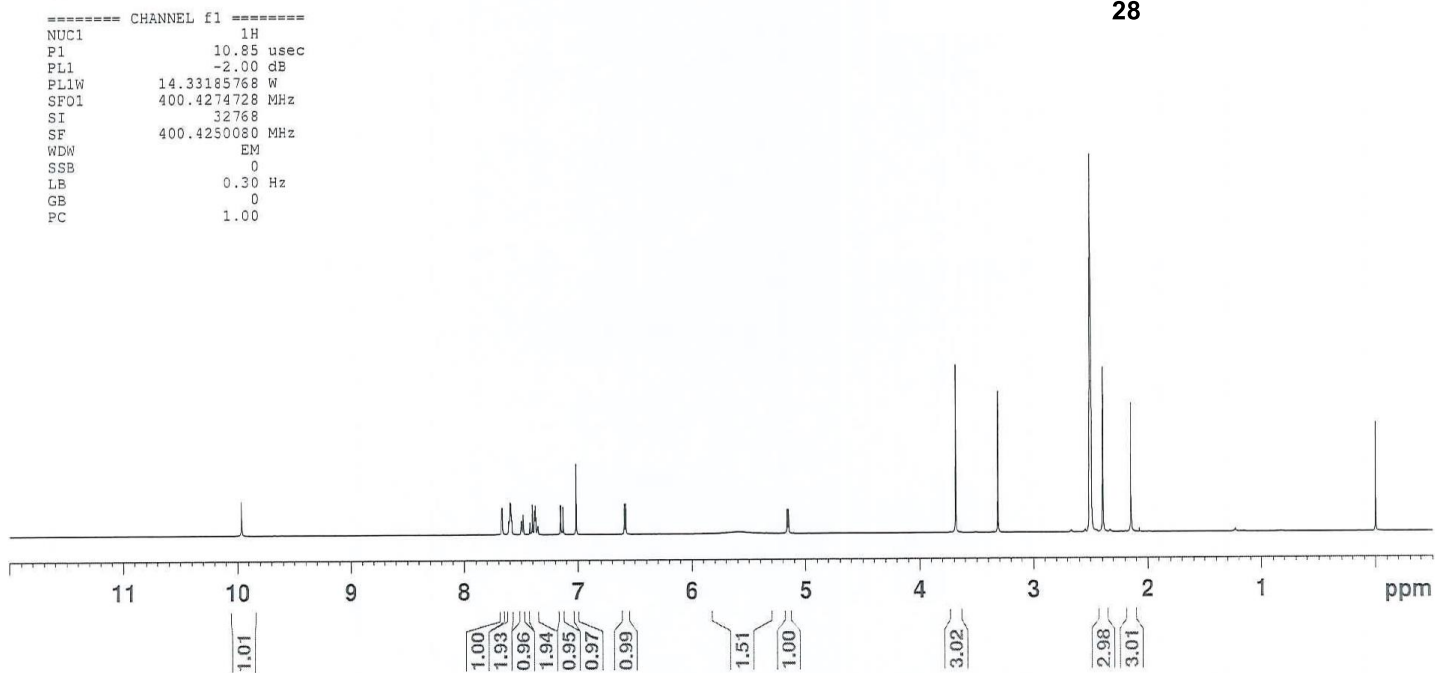

# <sup>1</sup>H NMR (400 MHz, DMSO-d<sub>6</sub>)

Current Data Parameters  
NAME IN-YSA-W-43-1  
EXPNO 1  
PROCNO 1

F2 - Acquisition Parameters  
Date\_ 20190802  
Time 13.06  
INSTRUM spect  
PROBHD 5 mm PABBO BB-  
PULPROG zg30  
TD 65536  
SOLVENT DMSO  
NS 32  
DS 2  
SWH 8223.685 Hz  
FIDRES 0.125483 Hz  
AQ 3.9846387 sec  
RG 161  
DW 60.800 usec  
DE 6.50 usec  
TE 298.2 K  
D1 1.0000000 sec  
TD0 1

===== CHANNEL f1 =====  
NUC1 1H  
P1 10.85 usec  
PL1 -2.00 dB  
PL1W 14.33185768 W  
SFO1 400.4274728 MHz

F2 - Processing parameters  
SI 32768  
SF 400.4250080 MHz  
WDW EM  
SSB 0  
LB 0.30 Hz  
GB 0  
PC 1.00

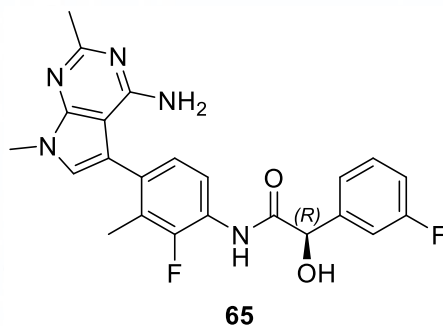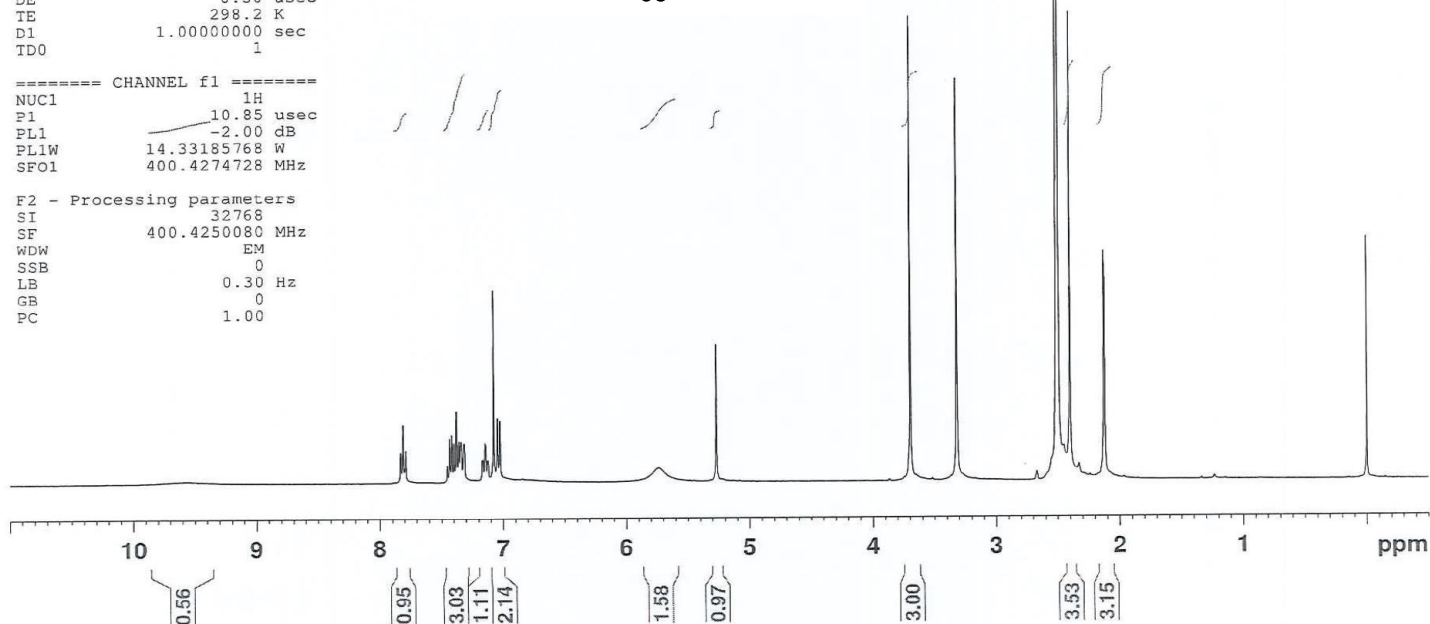

# <sup>1</sup>H NMR (400 MHz, DMSO-d<sub>6</sub>)

NAME IN-KNV-C-13-1  
EXPNO 6  
PROCNO 1  
Date\_ 20190828  
Time 10.59  
INSTRUM spect  
PROBHD 5 mm PABBO BB-  
PULPROG zg30  
TD 65536  
SOLVENT DMSO  
NS 16  
DS 2  
SWH 8223.685 Hz  
FIDRES 0.125483 Hz  
AQ 3.9846387 sec  
RG 161  
DW 60.800 usec  
DE 6.50 usec  
TE 296.4 K  
D1 1.00000000 sec  
TD0 1

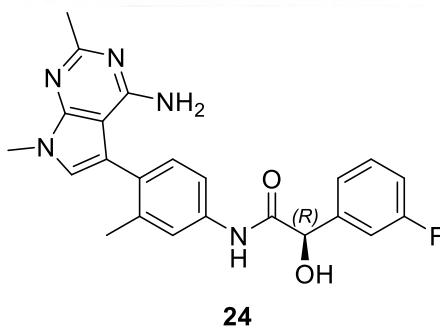

===== CHANNEL f1 =====  
NUC1 1H  
P1 10.85 usec  
PL1 -2.00 dB  
PL1W 14.33185768 W  
SFO1 400.4274728 MHz  
SI 32768  
SF 400.4250079 MHz  
WDW EM  
SSB 0  
LB 0.30 Hz  
GB 0  
PC 1.00

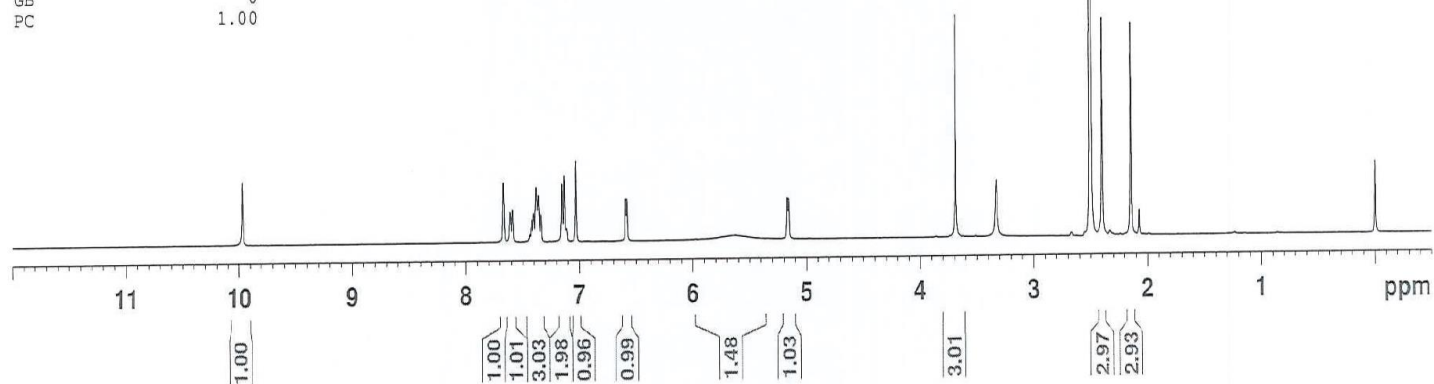

# <sup>1</sup>H NMR (400 MHz, DMSO-d<sub>6</sub>)

NAME IN-MVE-C-88-1  
EXPNO 1  
PROCNO 1  
Date\_ 20191024  
Time 10.05  
INSTRUM spect  
PROBHD 5 mm PABBO BB-  
PULPROG zg30  
TD 65536  
SOLVENT DMSO  
NS 16  
DS 2  
SWH 8223.685 Hz  
FIDRES 0.125483 Hz  
AQ 3.9846387 sec  
RG 144  
CW 60.800 usec  
DE 6.50 usec  
TE 298.2 K  
D1 1.0000000 sec  
TD0 1

===== CHANNEL f1 =====  
NUC1 1H  
P1 10.85 usec  
PL1 -2.00 dB  
PL1W 14.33185768 W  
SFO1 400.4274728 MHz  
SI 32768  
SF 400.4250077 MHz  
WDW EM  
SSB 0  
LB 0.30 Hz  
GB 0  
PC 1.00

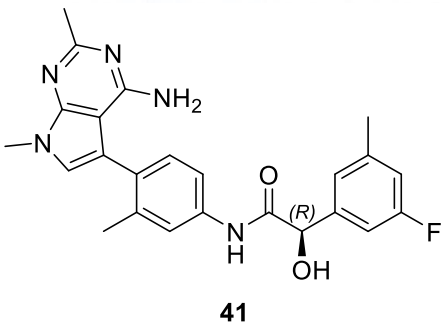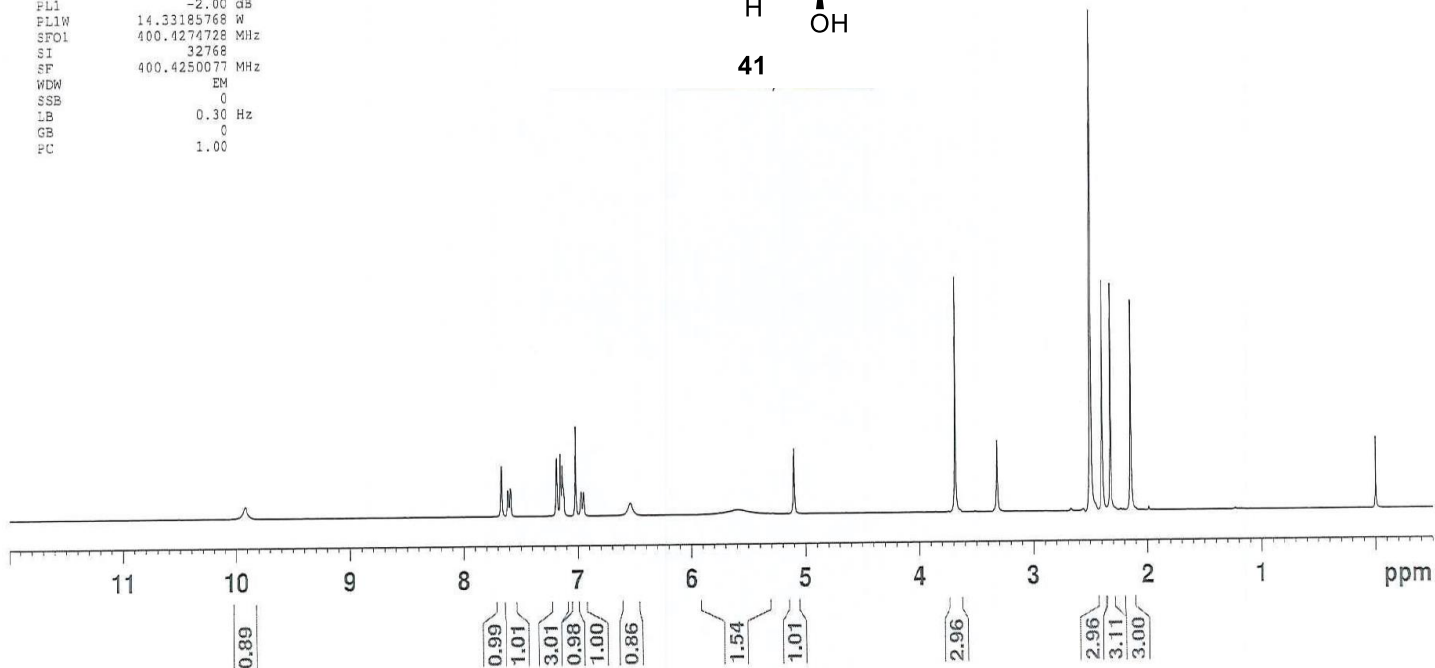

# <sup>1</sup>H NMR (400 MHz, DMSO-d<sub>6</sub>)

NAME IN-MVE-C-87-1  
EXPNO 1  
PROCNO 1  
Date\_ 20191023  
Time 10.20  
PROBHD 5 mm QNP 1H/13  
SOLVENT DMSO  
NS 16  
TE 294.6 K  
DS 2  
PULPROG zg30  
INSTRUM spect  
TD 65536  
D1 1.00000000 sec  
TD0 1

===== CHANNEL f1 =====  
NUC1 1H  
P1 14.00 usec  
PL1 -1.40 dB  
PL1W 13.31469536 W  
SFO1 400.1324710 MHz  
SI 32768  
SF 400.1300022 MHz  
WDW EM  
SSB 0  
LB 0.30 Hz  
GB 0  
PC 1.00

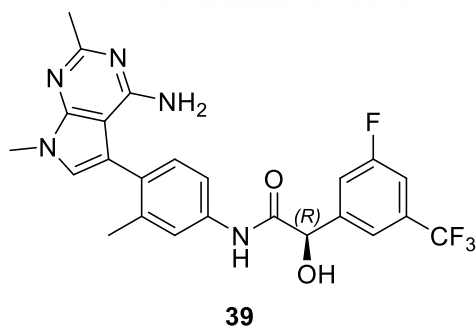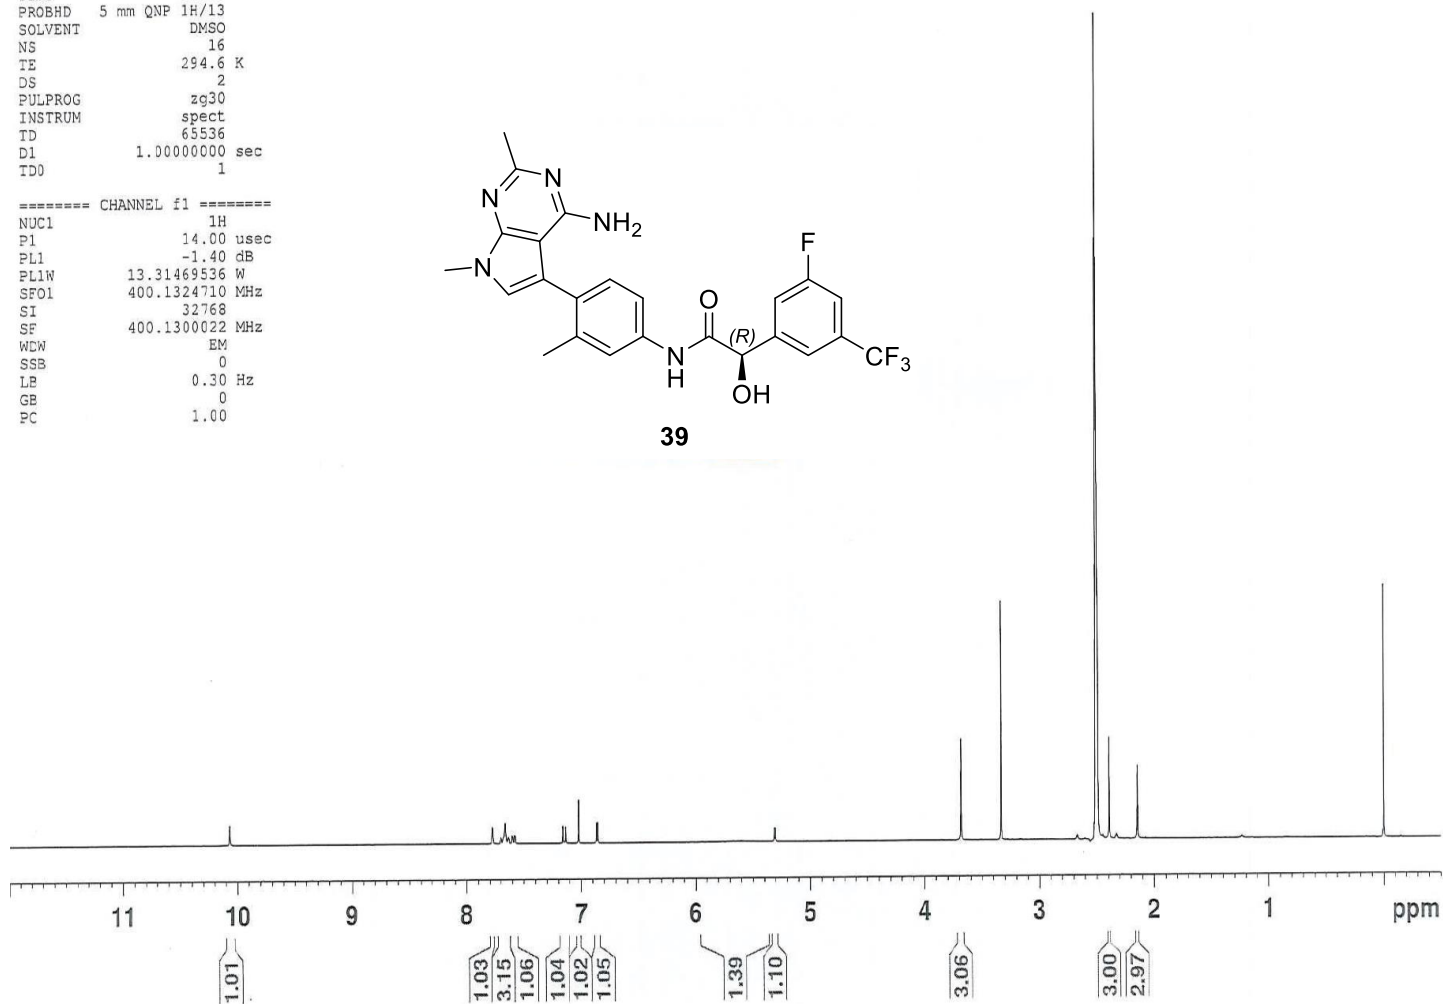

**<sup>1</sup>H NMR (400 MHz, DMSO-*d*<sub>6</sub>)**

NAME IN-RRC-J-100-1  
EXPNO 2  
PROCNO 1  
Date\_ 20200515  
Time 16.08  
INSTRUM spect  
PROBHD 5 mm PABBO BB-  
PULPROG zg30  
TD 65536  
SOLVENT DMSO  
NS 16  
DS 2  
SWH 8223.685 Hz  
FIDRES 0.125483 Hz  
AQ 3.9846387 sec  
RG 812  
DW 60.800 usec  
DE 6.50 usec  
TE 298.3 K  
D1 1.00000000 sec  
TD0 1

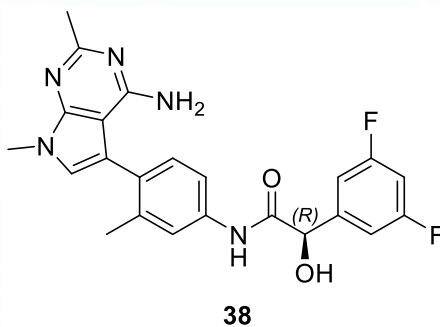

===== CHANNEL f1 =====  
NUC1 1H  
P1 10.85 usec  
PL1 -2.00 dB  
PL1W 14.33185768 W  
SFO1 400.4274728 MHz  
SI 32768  
SF 400.4250078 MHz  
WDW EM  
SSB 0  
LB 0.30 Hz  
GB 0  
PC 1.00

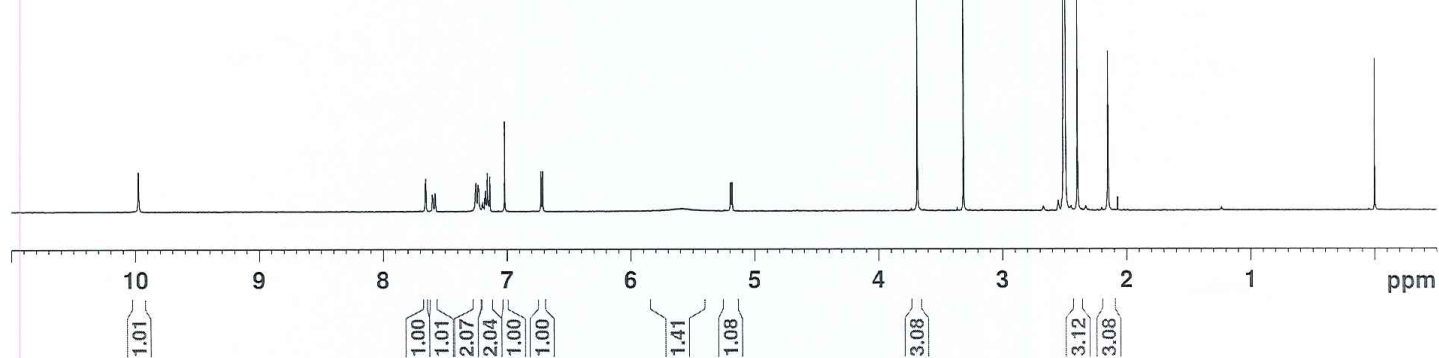

# <sup>1</sup>H NMR (400 MHz, DMSO-d<sub>6</sub>)

NAME IN-BNA-B-155-2  
EXPNO 1  
PROCNO 1  
Date\_ 20191106  
Time 10.28  
INSTRUM spect  
PROBHD 5 mm PABBO BB-  
PULPROG zg30  
TD 65536  
SOLVENT DMSO  
NS 16  
DS 2  
SWH 8223.685 Hz  
FIDRES 0.125483 Hz  
AQ 3.9846387 sec  
RG 256  
DW 60.800 usec  
DE 6.50 usec  
TE 298.2 K  
D1 1.0000000 sec  
TD0 1

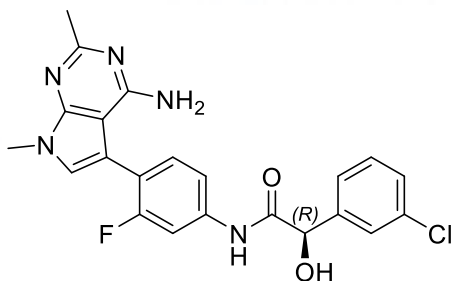

48

===== CHANNEL f1 =====  
NUC1 1H  
P1 10.85 usec  
PL1 -2.00 dB  
PL1W 14.33185768 W  
SFO1 400.4274728 MHz  
SI 32768  
SF 400.4250082 MHz  
WDW EM  
SSB 0  
LB 0.30 Hz  
GB 0  
PC 1.00

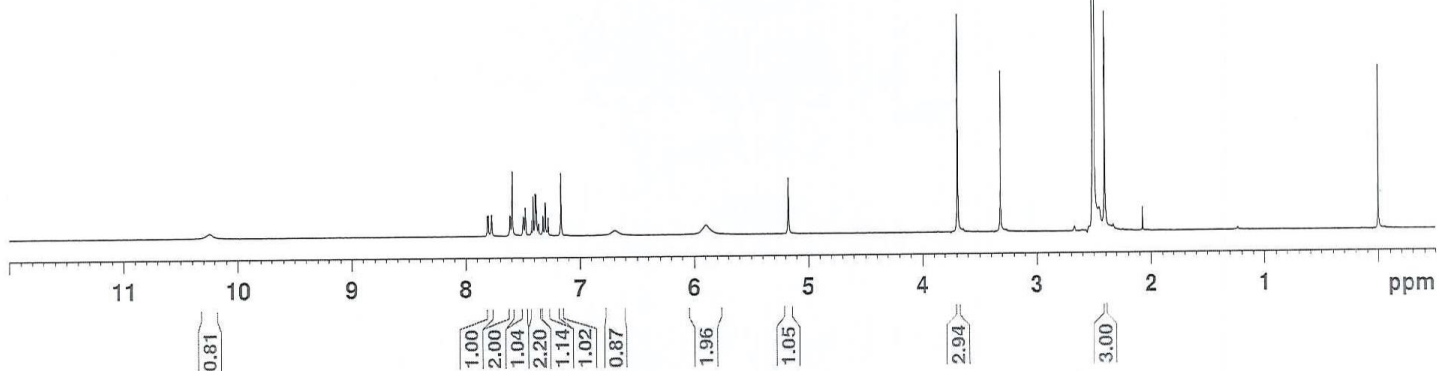

**<sup>1</sup>H NMR (400 MHz, DMSO-d<sub>6</sub>)**

NAME IN-ALR-G-55-1  
EXPNO 1  
PROCNO 1  
Date\_ 20190810  
Time 13.14  
PROBHD 5 mm QNP 1H/13  
SOLVENT DMSO  
NS 16  
TE 294.4 K  
DS 2  
PULPROG zg30  
INSTRUM spect  
TD 65536  
D1 1.00000000 sec  
TD0 1

===== CHANNEL f1 =====  
NUC1 1H  
P1 14.00 usec  
PL1 -1.40 dB  
PL1W 13.31469536 W  
SFO1 400.1324710 MHz  
SI 32768  
SF 400.1300022 MHz  
WDW EM  
SSB 0  
LB 0.30 Hz  
GB 0  
PC 1.00

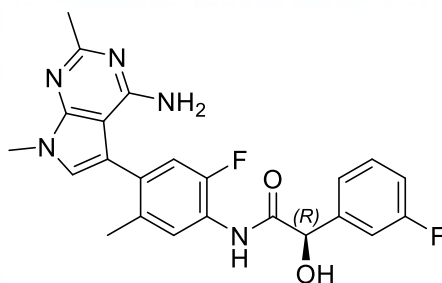

**66**

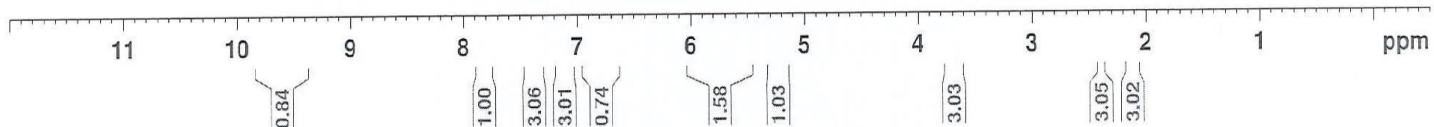



# <sup>1</sup>H NMR (400 MHz, DMSO-d<sub>6</sub>)

NAME IN-YSA-W-152-2  
EXPNO 3  
PROCNO 1  
Date\_ 20191107  
Time 10.05  
INSTRUM spect  
PROBHD 5 mm PABBO BB-  
PULPROG zg30  
TD 65536  
SOLVENT DMSO  
NS 32  
DS 2  
SWH 8223.685 Hz  
FIDRES 0.125483 Hz  
AQ 3.9846387 sec  
RG 181  
DW 60.800 usec  
DE 6.50 usec  
TE 298.2 K  
D1 1.0000000 sec  
TD0 1

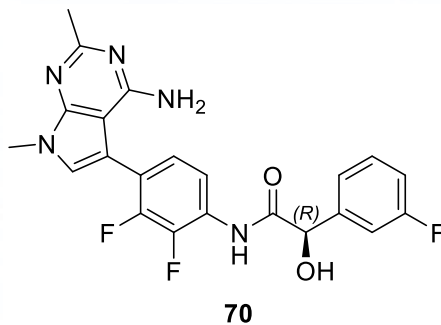

===== CHANNEL f1 =====  
NUC1 1H  
P1 10.85 usec  
PL1 -2.00 dB  
PL1W 14.33185768 W  
SFO1 400.4274728 MHz  
SI 32768  
SF 400.4250081 MHz  
WDW EM  
SSB 0  
LB 0.30 Hz  
GB 0  
PC 1.00

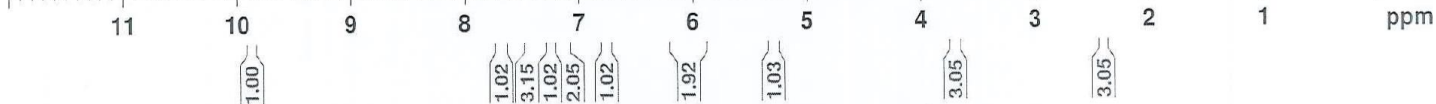

## 2. Crystallography

**Supplemental Table S1.** Crystallography data collection and refinement statistics.

|                                               |                    |                    |                    |
|-----------------------------------------------|--------------------|--------------------|--------------------|
| Inhibitor                                     | 11                 | 24                 | 26                 |
| PDB ID                                        | 8EQ9               | 8EQD               | 8EQE               |
| Data collection beamline                      | APS 17ID           | APS 23-ID-D        | APS 23-ID-D        |
| Wavelength (Å)                                | 1.00               | 1.033              | 1.033              |
| Space group                                   | P3 <sub>2</sub> 21 | P3 <sub>2</sub> 21 | P3 <sub>2</sub> 21 |
| Unit cell                                     |                    |                    |                    |
| a = b (Å)                                     | 126.73             | 125.90             | 125.34             |
| c (Å)                                         | 58.77              | 55.22              | 58.08              |
| $\alpha=\beta$ (°)                            | 90                 | 90                 | 90                 |
| $\gamma$ (°)                                  | 120                | 120                | 120                |
| Resolution (Å)                                | 55 – 2.86          | 50 – 2.92          | 55.0 – 2.56        |
| Highest-resolution shell (Å)                  | 2.93 – 2.86        | 3.00 – 2.92        | 2.63 – 2.56        |
| No. of total reflections                      | 122456             | 71294              | 167478             |
| No. of unique reflections                     | 12802              | 10640              | 17214              |
| R <sub>merge</sub> (%)                        | 12.6 (69.6)        | 9.7 (85.3)         | 7.2 (118.0)*       |
| I/ $\sigma$ (I)                               | 8.0 (2.4)          | 9.5 (1.7)          | 15.0 (1.8)         |
| Completeness (%)                              | 100.0 (100.0)      | 96.2 (98.8)        | 100.0 (100.0)      |
| Multiplicity                                  | 9.6 (10.0)         | 6.7 (6.8)          | 9.7 (10.0)         |
| Refinement                                    |                    |                    |                    |
| R <sub>work</sub>                             | 0.239 (0.453)      | 0.246 (0.481)      | 0.224 (0.477)      |
| R <sub>free</sub>                             | 0.277 (0.469)      | 0.280 (0.428)      | 0.287 (0.480)      |
| No. of protein atoms                          | 2095               | 2106               | 2108               |
| No. of inhibitor atoms                        | 30                 | 31                 | 34                 |
| No. of water atoms                            | 24                 | 0                  | 6                  |
| Average B-factor, protein (Å <sup>2</sup> )   | 84.2               | 101.1              | 84.5               |
| Average B-factor, inhibitor (Å <sup>2</sup> ) | 47.8               | 63.2               | 56.5               |
| Average B-factor, water (Å <sup>2</sup> )     | 49.6               | -                  | 56.5               |
| r.m.s.d. bond length (Å)                      | 0.004              | 0.002              | 0.003              |
| r.m.s.d. angle (°)                            | 1.30               | 1.21               | 1.25               |
| Ramachandran plot#                            |                    |                    |                    |
| Favored (%)                                   | 91.8               | 94.8               | 95.2               |
| Allowed (%)                                   | 8.2                | 5.2                | 4.8                |
| Outliers (%)                                  | 0.0                | 0.0                | 0.0                |

\* The values in parenthesis are for the highest-resolution shell.

# Calculated by Molprobity (1).

### 3. Supplemental Data

Cellular viability assays using AML and CEL cell lines, **26** exhibited IC<sub>50</sub> values of 0.226  $\mu$ M and 0.311  $\mu$ M in the FLT3-ITD mutant cell lines MV4-11 and MOLM-13, and no inhibitory effect up to 10  $\mu$ M against two FLT3wt lines MOLM-16 and Kasumi. The inhibitory effect of **26** against FLT3-ITD was evaluated in cells by quantifying p-STAT5 and p-ERK, two canonical downstream readouts of FLT3-ITD activity in MV4-11 cells. Treatment with **26** inhibited pSTAT5 and pERK at IC<sub>50</sub> values of 64 nM and 551 nM, respectively. Together, these data indicate **26** presents moderate inhibitory activity against FLT3-ITD mutant kinase but not wild-type FLT3 (in contrast, other FLT3 inhibitors- gilteritinib, crenolanib, quizartinib- decrease viability of FLT3wt cell lines; Supplemental Figure S1).

| Compound     | Viability IC <sub>50</sub> ( $\mu$ M) |                       |                     |                      |
|--------------|---------------------------------------|-----------------------|---------------------|----------------------|
|              | MV4-11<br>(FLT3-ITD)                  | MOLM-13<br>(FLT3-ITD) | MOLM-16<br>(FLT3wt) | Kasumi-1<br>(FLT3wt) |
| <b>26</b>    | 0.226                                 | 0.311                 | >10                 | >10                  |
| Gilteritinib | n.d.                                  | 0.014                 | n.d.                | 0.478                |
| Crenolanib   | n.d.                                  | 0.003                 | n.d.                | 0.08                 |
| Quizartinib  | n.d.                                  | <0.001                | n.d.                | 0.006                |

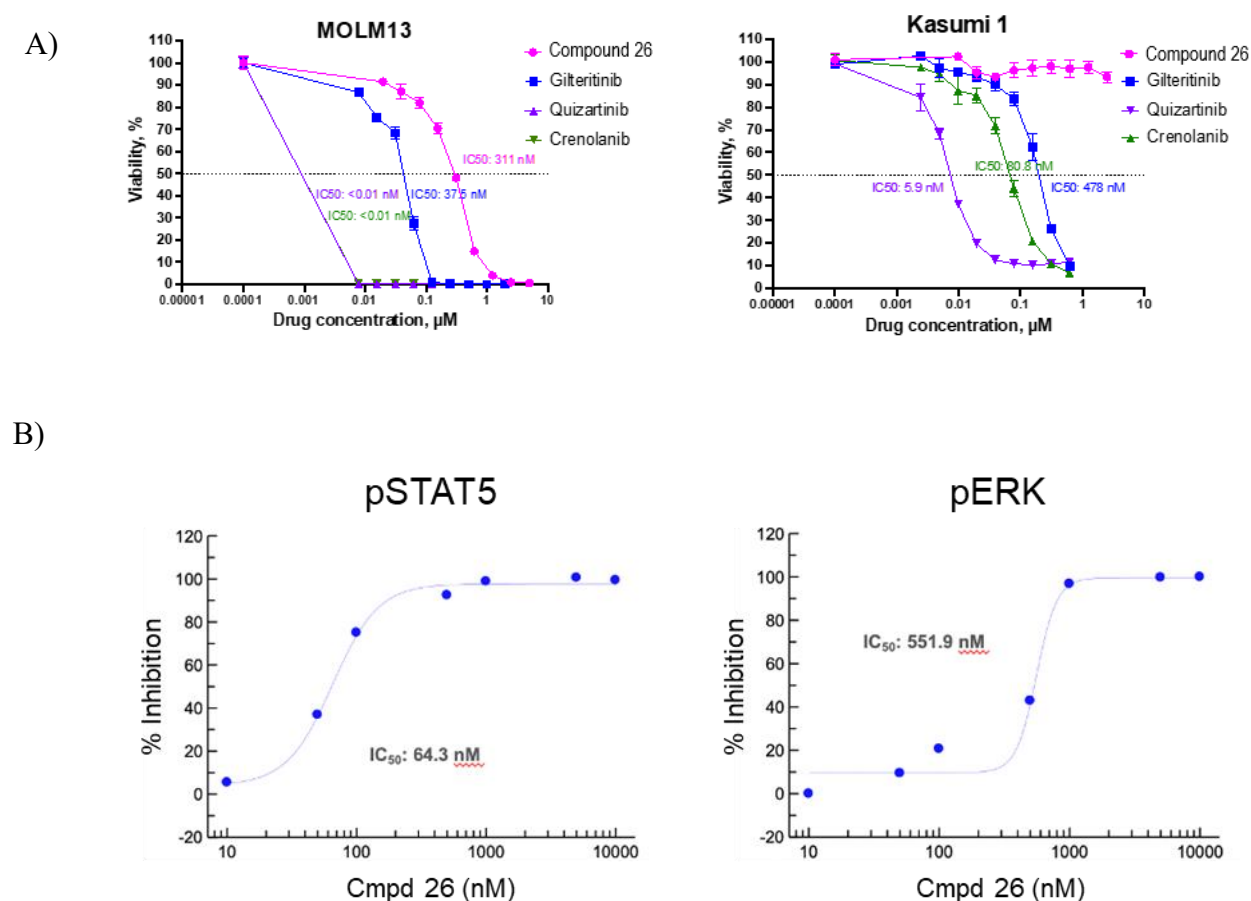

**Supplemental Figure S1. Cmpd 26 is selective against cell lines driven by FLT3-ITD.** A) in vitro cell viability IC<sub>50</sub> in human AML and CEL cancer cell lines expressing either FLT3wt or FLT3-ITD mutation background. Viability IC<sub>50</sub> graphs for **26** and FLT3

inhibitors (Gilteritinib, Quizartinib, Crenolab). MV4-11 and MOLM-16 were not tested with FLT3 inhibitors (not determined; n.d). B)  $IC_{50}$  values for inhibition of FLT3-ITD downstream signaling through STAT5 and ERK in MV4-11 cells. Values were normalized to Crenolanib (100% inhibition).

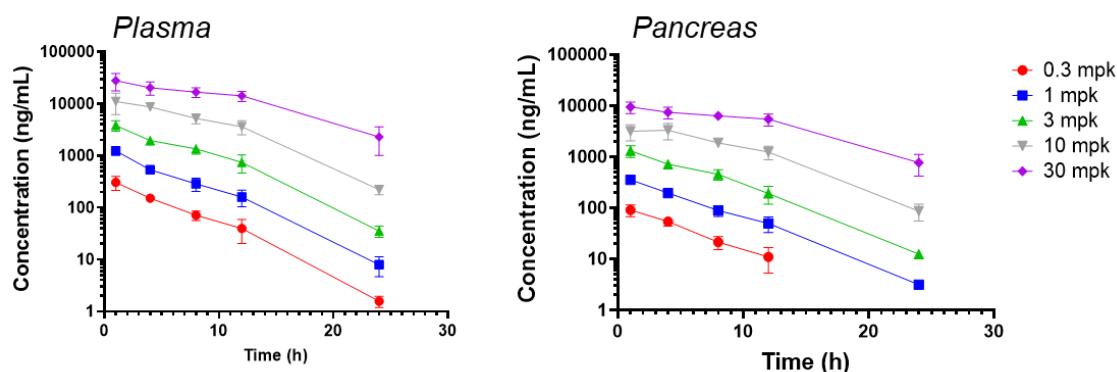

**Supplemental Figure S2. In vivo PK in plasma and pancreas.** Plasma and pancreas sampled at 1, 4, 8, 12, 24 h following a single oral administration of **26** at indicated dose levels. Values indicate average of 5 mice; **26** abundance determined by LC-MS/MS.

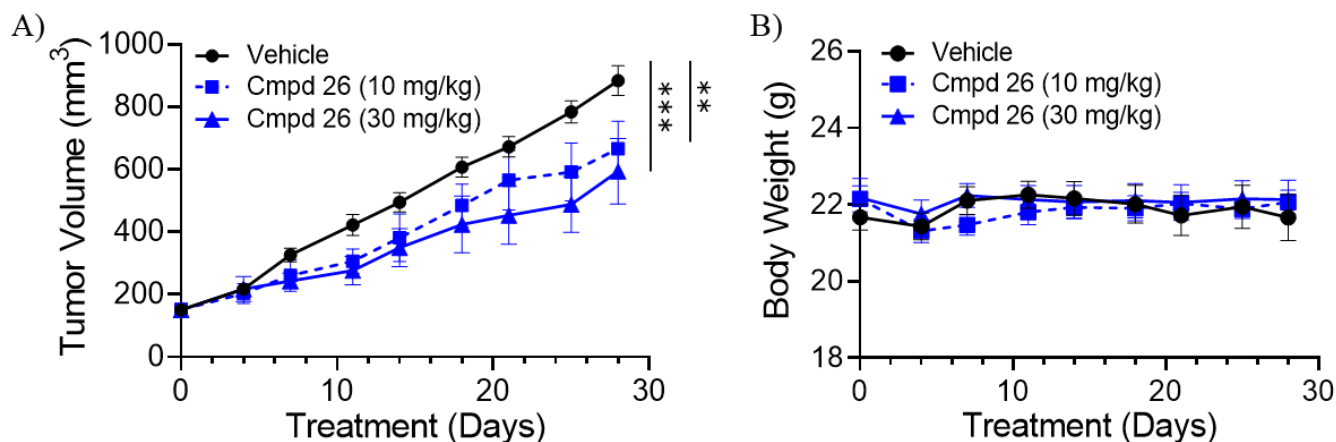

**Supplemental Figure S3. Compound 26 slows growth of 786-O RCC tumor xenografts.** A) Mice harboring 786-O xenografts were treated with 10 or 30 mg/kg **26** for 28 days. Treatments significantly decreased tumor volume (ANOVA; \*\*  $p < 0.01$ , \*\*\*  $p < 0.001$ ). B) Mouse body weight measurements taken across the 28-day study period. No significant effects on body weight were observed.

**Supplemental Table S2.** scanMAXSM Kinome Assay Results. Complete tabulated data of all 468 kinases from the panel, including 403 wild-type and 65 mutant isoforms. Values displayed represent Percent Activity (%) relative to control. Cmpd **11** and Cmpd **24** assayed at 1000 nM; Cmpd **26** assayed at both 100 nM and 1000 nM.

| <i>DiscoverX Gene Symbol</i> | <i>% Control</i>          |                           |                          |                           |                     |     |     |     |     |
|------------------------------|---------------------------|---------------------------|--------------------------|---------------------------|---------------------|-----|-----|-----|-----|
|                              | <b>11</b><br>(1000<br>nM) | <b>24</b><br>(1000<br>nM) | <b>26</b><br>(100<br>nM) | <b>26</b><br>(1000<br>nM) |                     |     |     |     |     |
| AAK1                         | 89                        | 99                        | 100                      | 96                        | CAMK2B              | 100 | 100 | 100 | 99  |
| ABL1(E255K)-phosph.          | 65                        | 100                       | 100                      | 89                        | CAMK2D              | 80  | 65  | 97  | 88  |
| ABL1(F317I)-nonphosph.       | 96                        | 100                       | 100                      | 99                        | CAMK2G              | 66  | 100 | 100 | 91  |
| ABL1(F317I)-phosph.          | 92                        | 77                        | 100                      | 96                        | CAMK4               | 32  | 100 | 100 | 75  |
| ABL1(F317L)-nonphosph.       | 86                        | 100                       | 100                      | 96                        | CAMKK1              | 100 | 90  | 100 | 84  |
| ABL1(F317L)-phosph.          | 86                        | 100                       | 100                      | 93                        | CAMKK2              | 100 | 90  | 97  | 84  |
| ABL1(H396P)-nonphosph.       | 71                        | 95                        | 100                      | 91                        | CASK                | 95  | 100 | 89  | 88  |
| ABL1(H396P)-phosph.          | 75                        | 76                        | 100                      | 100                       | CDC2L1              | 100 | 97  | 100 | 100 |
| ABL1(M351T)-phosph.          | 98                        | 100                       | 100                      | 93                        | CDC2L2              | 90  | 99  | 100 | 100 |
| ABL1(Q252H)-nonphosph.       | 66                        | 98                        | 99                       | 78                        | CDC2L5              | 100 | 82  | 100 | 89  |
| ABL1(Q252H)-phosph.          | 98                        | 100                       | 100                      | 74                        | CDK11               | 1   | 89  | 89  | 8.2 |
| ABL1(T315I)-nonphosph.       | 72                        | 100                       | 100                      | 89                        | CDK2                | 100 | 100 | 94  | 98  |
| ABL1(T315I)-phosph.          | 75                        | 100                       | 100                      | 91                        | CDK3                | 85  | 100 | 100 | 97  |
| ABL1(Y253F)-phosph.          | 82                        | 63                        | 100                      | 77                        | CDK4                | 100 | 100 | 100 | 85  |
| ABL1-nonphosph.              | 55                        | 100                       | 98                       | 84                        | CDK4-cyclinD1       | 100 | 100 | 100 | 93  |
| ABL1-phosph.                 | 68                        | 100                       | 97                       | 72                        | CDK4-cyclinD3       | 94  | 100 | 100 | 84  |
| ABL2                         | 100                       | 100                       | 100                      | 97                        | CDK5                | 95  | 100 | 95  | 100 |
| ACVR1                        | 99                        | 100                       | 100                      | 100                       | CDK7                | 38  | 98  | 100 | 70  |
| ACVR1B                       | 86                        | 95                        | 100                      | 95                        | CDK8                | 2.5 | 98  | 100 | 57  |
| ACVR2A                       | 100                       | 100                       | 75                       | 100                       | CDK9                | 100 | 100 | 100 | 100 |
| ACVR2B                       | 100                       | 100                       | 100                      | 100                       | CDKL1               | 73  | 98  | 96  | 90  |
| ACVRL1                       | 100                       | 100                       | 100                      | 100                       | CDKL2               | 97  | 100 | 100 | 100 |
| ADCK3                        | 93                        | 100                       | 100                      | 100                       | CDKL3               | 78  | 100 | 93  | 99  |
| ADCK4                        | 100                       | 91                        | 100                      | 100                       | CDKL5               | 92  | 86  | 100 | 90  |
| AKT1                         | 90                        | 100                       | 86                       | 100                       | CHEK1               | 100 | 89  | 100 | 98  |
| AKT2                         | 100                       | 100                       | 100                      | 100                       | CHEK2               | 90  | 97  | 94  | 94  |
| AKT3                         | 88                        | 100                       | 100                      | 100                       | CIT                 | 93  | 99  | 100 | 97  |
| ALK                          | 90                        | 100                       | 96                       | 36                        | CLK1                | 86  | 100 | 100 | 77  |
| ALK(C1156Y)                  | 78                        | 100                       | 100                      | 57                        | CLK2                | 95  | 100 | 100 | 91  |
| ALK(L1196M)                  | 85                        | 100                       | 100                      | 93                        | CLK3                | 81  | 100 | 100 | 76  |
| AMPK-alpha1                  | 94                        | 100                       | 98                       | 45                        | CLK4                | 93  | 100 | 87  | 100 |
| AMPK-alpha2                  | 76                        | 85                        | 77                       | 96                        | CSF1R               | 45  | 94  | 99  | 15  |
| ANKK1                        | 78                        | 96                        | 100                      | 85                        | CSF1R-autoinhibited | 53  | 100 | 100 | 89  |
| ARK5                         | 100                       | 96                        | 100                      | 93                        | CSK                 | 83  | 99  | 100 | 100 |
| ASK1                         | 92                        | 95                        | 100                      | 99                        | CSNK1A1             | 62  | 100 | 100 | 97  |
| ASK2                         | 93                        | 86                        | 95                       | 100                       | CSNK1A1L            | 99  | 100 | 100 | 100 |
| AURKA                        | 72                        | 100                       | 98                       | 96                        | CSNK1D              | 100 | 100 | 100 | 91  |
| AURKB                        | 24                        | 90                        | 81                       | 70                        | CSNK1E              | 63  | 100 | 100 | 89  |
| AURKC                        | 81                        | 100                       | 100                      | 100                       | CSNK1G1             | 95  | 100 | 100 | 81  |
| AXL                          | 56                        | 100                       | 99                       | 0.7                       | CSNK1G2             | 96  | 100 | 98  | 99  |
| BIKE                         | 100                       | 97                        | 100                      | 94                        | CSNK1G3             | 97  | 100 | 100 | 99  |
| BLK                          | 19                        | 100                       | 100                      | 91                        | CSNK2A1             | 93  | 95  | 84  | 90  |
| BMPR1A                       | 86                        | 96                        | 100                      | 95                        | CSNK2A2             | 68  | 100 | 100 | 88  |
| BMPR1B                       | 99                        | 100                       | 97                       | 80                        | CTK                 | 60  | 100 | 100 | 100 |
| BMPR2                        | 96                        | 100                       | 100                      | 99                        | DAPK1               | 100 | 100 | 100 | 100 |
| BMX                          | 87                        | 100                       | 100                      | 84                        | DAPK2               | 100 | 100 | 100 | 99  |
| BRAF                         | 76                        | 100                       | 100                      | 96                        | DAPK3               | 100 | 99  | 100 | 94  |
| BRAF(V600E)                  | 52                        | 100                       | 99                       | 99                        | DCAMKL1             | 44  | 82  | 100 | 100 |
| BRK                          | 94                        | 100                       | 100                      | 97                        | DCAMKL2             | 93  | 98  | 100 | 100 |
| BRSK1                        | 100                       | 78                        | 100                      | 87                        | DCAMKL3             | 69  | 100 | 100 | 100 |
| BRSK2                        | 78                        | 86                        | 100                      | 97                        | DDR1                | 72  | 100 | 100 | 29  |
| BTK                          | 95                        | 92                        | 100                      | 73                        | DDR2                | 100 | 96  | 100 | 68  |
| BUB1                         | 100                       | 97                        | 81                       | 97                        | DLK                 | 100 | 97  | 100 | 84  |
| CAMK1                        | 44                        | 100                       | 100                      | 96                        | DMPK                | 100 | 91  | 100 | 100 |
| CAMK1B                       | 98                        | 91                        | 100                      | 100                       | DMPK2               | 74  | 100 | 100 | 100 |
| CAMK1D                       | 70                        | 100                       | 100                      | 100                       | DRAK1               | 90  | 97  | 100 | 98  |
| CAMK1G                       | 77                        | 100                       | 99                       | 96                        | DRAK2               | 98  | 95  | 99  | 73  |
| CAMK2A                       | 93                        | 100                       | 100                      | 93                        | DYRK1A              | 77  | 86  | 100 | 77  |
|                              |                           |                           |                          |                           | DYRK1B              | 47  | 100 | 93  | 96  |
|                              |                           |                           |                          |                           | DYRK2               | 89  | 90  | 90  | 100 |
|                              |                           |                           |                          |                           | EGFR                | 100 | 81  | 100 | 85  |
|                              |                           |                           |                          |                           | EGFR(E746-A750del)  | 63  | 73  | 100 | 97  |
|                              |                           |                           |                          |                           | EGFR(G719C)         | 67  | 88  | 100 | 83  |

|                           |     |     |     |     |                           |     |     |     |      |
|---------------------------|-----|-----|-----|-----|---------------------------|-----|-----|-----|------|
| EGFR(G719S)               | 84  | 91  | 100 | 100 | HIPK3                     | 97  | 100 | 100 | 69   |
| EGFR(L747-E749del, A750P) | 84  | 100 | 93  | 88  | HIPK4                     | 16  | 100 | 69  | 3.8  |
| EGFR(L747-S752del, P753S) | 100 | 99  | 100 | 94  | HPK1                      | 53  | 90  | 83  | 97   |
| EGFR(L747-T751del,Sins)   | 95  | 100 | 96  | 100 | HUNK                      | 91  | 100 | 100 | 100  |
| EGFR(L858R)               | 100 | 81  | 99  | 86  | ICK                       | 93  | 69  | 92  | 80   |
| EGFR(L858R,T790M)         | 83  | 98  | 78  | 100 | IGF1R                     | 90  | 100 | 94  | 100  |
| EGFR(L861Q)               | 94  | 100 | 96  | 100 | IKK-alpha                 | 81  | 98  | 96  | 100  |
| EGFR(S752-I759del)        | 100 | 100 | 94  | 100 | IKK-beta                  | 69  | 100 | 92  | 99   |
| EGFR(T790M)               | 94  | 89  | 100 | 100 | IKK-epsilon               | 67  | 90  | 97  | 72   |
| EIF2AK1                   | 49  | 73  | 89  | 78  | INSR                      | 77  | 100 | 99  | 71   |
| EPHA1                     | 55  | 100 | 100 | 99  | INSRR                     | 100 | 88  | 100 | 95   |
| EPHA2                     | 87  | 100 | 100 | 100 | IRAK1                     | 86  | 92  | 100 | 100  |
| EPHA3                     | 100 | 100 | 100 | 99  | IRAK3                     | 82  | 90  | 100 | 60   |
| EPHA4                     | 78  | 98  | 100 | 88  | IRAK4                     | 68  | 95  | 100 | 94   |
| EPHA5                     | 100 | 100 | 99  | 100 | ITK                       | 100 | 100 | 100 | 97   |
| EPHA6                     | 100 | 86  | 98  | 79  | JAK1(JH1domain-catalytic) | 100 | 100 | 100 | 96   |
| EPHA7                     | 97  | 100 | 100 | 100 | JAK1(JH2domain-pseudok)   | 54  | 54  | 100 | 92   |
| EPHA8                     | 100 | 100 | 100 | 93  | JAK2(JH1domain-catalytic) | 74  | 100 | 99  | 85   |
| EPHB1                     | 100 | 100 | 100 | 97  | JAK3(JH1domain-catalytic) | 91  | 84  | 100 | 88   |
| EPHB2                     | 76  | 100 | 94  | 95  | JNK1                      | 95  | 86  | 91  | 89   |
| EPHB3                     | 99  | 100 | 100 | 96  | JNK2                      | 100 | 88  | 95  | 70   |
| EPHB4                     | 100 | 100 | 100 | 94  | JNK3                      | 93  | 100 | 91  | 69   |
| EPHB6                     | 2.6 | 100 | 94  | 48  | KIT                       | 38  | 100 | 97  | 0.65 |
| ERBB2                     | 100 | 75  | 100 | 100 | KIT(A829P)                | 89  | 100 | 100 | 100  |
| ERBB3                     | 89  | 76  | 100 | 98  | KIT(D816H)                | 100 | 100 | 85  | 69   |
| ERBB4                     | 85  | 95  | 100 | 97  | KIT(D816V)                | 96  | 100 | 100 | 100  |
| ERK1                      | 98  | 100 | 96  | 99  | KIT(L576P)                | 36  | 98  | 85  | 2.6  |
| ERK2                      | 98  | 73  | 99  | 100 | KIT(V559D)                | 27  | 72  | 96  | 0.45 |
| ERK3                      | 100 | 100 | 100 | 97  | KIT(V559D,T670I)          | 100 | 98  | 93  | 69   |
| ERK4                      | 100 | 100 | 100 | 100 | KIT(V559D,V654A)          | 100 | 94  | 98  | 62   |
| ERK5                      | 64  | 82  | 100 | 75  | KIT-autoinhibited         | 85  | 88  | 100 | 100  |
| ERK8                      | 89  | 100 | 100 | 92  | LATS1                     | 94  | 100 | 98  | 82   |
| ERN1                      | 88  | 100 | 82  | 95  | LATS2                     | 86  | 78  | 89  | 86   |
| FAK                       | 90  | 100 | 100 | 100 | LCK                       | 55  | 93  | 97  | 92   |
| FER                       | 87  | 100 | 100 | 98  | LIMK1                     | 86  | 100 | 100 | 100  |
| FES                       | 100 | 96  | 100 | 100 | LIMK2                     | 100 | 100 | 94  | 66   |
| FGFR1                     | 91  | 95  | 100 | 100 | LKB1                      | 100 | 95  | 100 | 99   |
| FGFR2                     | 92  | 100 | 100 | 100 | LOK                       | 4   | 88  | 94  | 12   |
| FGFR3                     | 100 | 100 | 100 | 100 | LRRK2                     | 71  | 100 | 100 | 87   |
| FGFR3(G697C)              | 93  | 85  | 92  | 100 | LRRK2(G2019S)             | 94  | 100 | 97  | 81   |
| FGFR4                     | 87  | 95  | 98  | 79  | LTK                       | 35  | 100 | 98  | 22   |
| FGR                       | 89  | 97  | 100 | 96  | LYN                       | 85  | 83  | 99  | 99   |
| FLT1                      | 81  | 99  | 100 | 90  | LZK                       | 100 | 100 | 98  | 90   |
| FLT3                      | 4.3 | 66  | 41  | 0   | MAK                       | 99  | 100 | 100 | 100  |
| FLT3(D835H)               | 33  | 98  | 85  | 25  | MAP3K1                    | 61  | 100 | 88  | 82   |
| FLT3(D835V)               | 52  | 100 | 100 | 8.5 | MAP3K15                   | 29  | 82  | 100 | 99   |
| FLT3(D835Y)               | 80  | 96  | 88  | 35  | MAP3K2                    | 14  | 100 | 100 | 89   |
| FLT3(ITD)                 | 34  | 94  | 95  | 9.4 | MAP3K3                    | 32  | 100 | 100 | 92   |
| FLT3(ITD,D835V)           | 89  | 100 | 100 | 75  | MAP3K4                    | 70  | 100 | 92  | 82   |
| FLT3(ITD,F691L)           | 100 | 63  | 41  | 42  | MAP4K2                    | 100 | 94  | 94  | 89   |
| FLT3(K663Q)               | 26  | 83  | 51  | 20  | MAP4K3                    | 53  | 98  | 98  | 74   |
| FLT3(N841I)               | 0.3 | 100 | 34  | 0   | MAP4K4                    | 84  | 100 | 100 | 98   |
| FLT3(R834Q)               | 59  | 98  | 84  | 7.5 | MAP4K5                    | 68  | 100 | 100 | 96   |
| FLT3-autoinhibited        | 57  | 100 | 100 | 65  | MAPKAPK2                  | 100 | 93  | 100 | 100  |
| FLT4                      | 100 | 100 | 100 | 78  | MAPKAPK5                  | 100 | 100 | 99  | 88   |
| FRK                       | 95  | 100 | 96  | 90  | MARK1                     | 85  | 97  | 98  | 98   |
| FYN                       | 78  | 100 | 97  | 98  | MARK2                     | 100 | 100 | 100 | 100  |
| GAK                       | 79  | 100 | 100 | 91  | MARK3                     | 100 | 76  | 99  | 96   |
| GCN2(Kin.Dom.2,S808G)     | 84  | 100 | 76  | 94  | MARK4                     | 67  | 100 | 100 | 100  |
| GRK1                      | 65  | 89  | 99  | 79  | MAST1                     | 81  | 100 | 100 | 89   |
| GRK2                      | 100 | 100 | 100 | 87  | MEK1                      | 90  | 92  | 97  | 96   |
| GRK3                      | 97  | 100 | 98  | 82  | MEK2                      | 75  | 69  | 99  | 98   |
| GRK4                      | 100 | 100 | 100 | 100 | MEK3                      | 83  | 88  | 100 | 98   |
| GRK7                      | 100 | 100 | 100 | 99  | MEK4                      | 75  | 81  | 100 | 100  |
| GSK3A                     | 66  | 83  | 100 | 98  | MEK5                      | 1.1 | 100 | 100 | 68   |
| GSK3B                     | 100 | 100 | 97  | 86  | MEK6                      | 55  | 100 | 87  | 100  |
| HASPIN                    | 100 | 37  | 75  | 81  | MELK                      | 91  | 93  | 97  | 100  |
| HCK                       | 85  | 100 | 94  | 67  | MERTK                     | 65  | 100 | 94  | 29   |
| HIPK1                     | 66  | 100 | 100 | 77  | MET                       | 66  | 100 | 96  | 90   |
| HIPK2                     | 77  | 96  | 100 | 100 | MET(M1250T)               | 85  | 100 | 100 | 90   |

|                       |     |     |     |     |                            |     |     |     |     |
|-----------------------|-----|-----|-----|-----|----------------------------|-----|-----|-----|-----|
| MET(Y1235D)           | 67  | 100 | 100 | 82  | PIK3CA(I800L)              | 94  | 74  | 98  | 91  |
| MINK                  | 50  | 100 | 100 | 100 | PIK3CA(M1043I)             | 100 | 100 | 82  | 86  |
| MKK7                  | 91  | 100 | 99  | 100 | PIK3CA(Q546K)              | 100 | 72  | 100 | 87  |
| MKNK1                 | 53  | 100 | 79  | 81  | PIK3CB                     | 100 | 100 | 100 | 95  |
| MKNK2                 | 1.2 | 58  | 88  | 3.9 | PIK3CD                     | 65  | 100 | 89  | 76  |
| MLCK                  | 67  | 63  | 100 | 94  | PIK3CG                     | 63  | 100 | 100 | 89  |
| MLK1                  | 100 | 100 | 96  | 97  | PIK4CB                     | 84  | 28  | 93  | 4.3 |
| MLK2                  | 62  | 78  | 100 | 96  | PIKFYVE                    | 100 | 63  | 85  | 88  |
| MLK3                  | 91  | 95  | 99  | 95  | PIM1                       | 93  | 73  | 98  | 100 |
| MRCKA                 | 98  | 100 | 100 | 100 | PIM2                       | 94  | 100 | 88  | 100 |
| MRCKB                 | 95  | 100 | 100 | 100 | PIM3                       | 98  | 99  | 99  | 100 |
| MST1                  | 82  | 100 | 100 | 100 | PIP5K1A                    | 94  | 90  | 80  | 100 |
| MST1R                 | 83  | 61  | 100 | 100 | PIP5K1C                    | 99  | 34  | 100 | 91  |
| MST2                  | 65  | 100 | 100 | 100 | PIP5K2B                    | 94  | 100 | 95  | 73  |
| MST3                  | 100 | 100 | 100 | 96  | PIP5K2C                    | 79  | 81  | 95  | 100 |
| MST4                  | 88  | 95  | 94  | 100 | PKAC-alpha                 | 95  | 100 | 81  | 93  |
| MTOR                  | 52  | 100 | 86  | 89  | PKAC-beta                  | 82  | 100 | 100 | 100 |
| MUSK                  | 100 | 88  | 100 | 88  | PKMYT1                     | 100 | 100 | 100 | 89  |
| MYLK                  | 59  | 100 | 100 | 91  | PKN1                       | 100 | 100 | 100 | 96  |
| MYLK2                 | 71  | 100 | 100 | 100 | PKN2                       | 78  | 100 | 97  | 95  |
| MYLK4                 | 64  | 92  | 92  | 100 | PKNB(M.tuberculosis)       | 97  | 100 | 100 | 94  |
| MYO3A                 | 83  | 100 | 100 | 79  | PLK1                       | 78  | 100 | 94  | 98  |
| MYO3B                 | 47  | 100 | 100 | 65  | PLK2                       | 92  | 89  | 100 | 95  |
| NDR1                  | 80  | 90  | 100 | 100 | PLK3                       | 94  | 78  | 100 | 100 |
| NDR2                  | 96  | 99  | 100 | 89  | PLK4                       | 87  | 95  | 100 | 97  |
| NEK1                  | 2.9 | 100 | 88  | 100 | PRKCD                      | 76  | 87  | 100 | 100 |
| NEK10                 | 100 | 100 | 100 | 95  | PRKCE                      | 91  | 65  | 98  | 97  |
| NEK11                 | 100 | 100 | 99  | 76  | PRKCH                      | 90  | 100 | 84  | 100 |
| NEK2                  | 81  | 81  | 100 | 85  | PRKCI                      | 45  | 100 | 90  | 91  |
| NEK3                  | 100 | 65  | 100 | 83  | PRKCQ                      | 82  | 81  | 100 | 93  |
| NEK4                  | 93  | 99  | 100 | 100 | PRKD1                      | 89  | 100 | 98  | 98  |
| NEK5                  | 34  | 100 | 100 | 96  | PRKD2                      | 95  | 100 | 99  | 99  |
| NEK6                  | 87  | 97  | 94  | 100 | PRKD3                      | 100 | 100 | 100 | 98  |
| NEK7                  | 95  | 94  | 100 | 100 | PRKG1                      | 93  | 100 | 100 | 100 |
| NEK9                  | 67  | 100 | 97  | 98  | PRKG2                      | 98  | 100 | 100 | 95  |
| NIK                   | 94  | 100 | 92  | 77  | PRKR                       | 42  | 42  | 91  | 96  |
| NIM1                  | 98  | 95  | 93  | 90  | PRKX                       | 100 | 100 | 100 | 87  |
| NLK                   | 100 | 100 | 100 | 98  | PRP4                       | 100 | 100 | 80  | 100 |
| OSR1                  | 94  | 100 | 96  | 88  | PYK2                       | 86  | 100 | 100 | 100 |
| p38-alpha             | 97  | 100 | 100 | 87  | QSK                        | 82  | 100 | 83  | 81  |
| p38-beta              | 92  | 100 | 100 | 91  | RAF1                       | 83  | 90  | 87  | 74  |
| p38-delta             | 100 | 95  | 100 | 98  | RET                        | 99  | 100 | 100 | 92  |
| p38-gamma             | 98  | 100 | 85  | 92  | RET(M918T)                 | 87  | 99  | 99  | 83  |
| PAK1                  | 87  | 100 | 100 | 100 | RET(V804L)                 | 90  | 100 | 99  | 93  |
| PAK2                  | 97  | 100 | 100 | 100 | RET(V804M)                 | 100 | 98  | 100 | 99  |
| PAK3                  | 36  | 100 | 97  | 31  | RIOK1                      | 54  | 100 | 100 | 100 |
| PAK4                  | 95  | 100 | 100 | 100 | RIOK2                      | 20  | 89  | 91  | 92  |
| PAK6                  | 100 | 100 | 100 | 100 | RIOK3                      | 100 | 100 | 100 | 100 |
| PAK7                  | 96  | 94  | 100 | 90  | RIPK1                      | 100 | 85  | 99  | 97  |
| PCTK1                 | 90  | 95  | 98  | 80  | RIPK2                      | 15  | 100 | 91  | 43  |
| PCTK2                 | 100 | 99  | 100 | 100 | RIPK4                      | 93  | 80  | 100 | 99  |
| PCTK3                 | 73  | 100 | 100 | 100 | RIPK5                      | 3.4 | 100 | 100 | 100 |
| PDGFRA                | 70  | 94  | 100 | 39  | ROCK1                      | 100 | 91  | 90  | 71  |
| PDGFRB                | 40  | 100 | 100 | 11  | ROCK2                      | 100 | 100 | 98  | 87  |
| PDPK1                 | 79  | 100 | 76  | 89  | ROS1                       | 79  | 100 | 100 | 95  |
| PFCDPK1(P.falciparum) | 83  | 89  | 100 | 76  | RPS6KA4(Kin.Dom.1-N-term.) | 50  | 100 | 100 | 92  |
| PFPK5(P.falciparum)   | 100 | 92  | 90  | 98  | RPS6KA4(Kin.Dom.2-C-term.) | 100 | 100 | 90  | 90  |
| PFTAIRES2             | 94  | 100 | 100 | 100 | RPS6KA5(Kin.Dom.1-N-term.) | 77  | 82  | 87  | 100 |
| PFTK1                 | 59  | 77  | 100 | 100 | RPS6KA5(Kin.Dom.2-C-term.) | 100 | 100 | 100 | 95  |
| PHKG1                 | 68  | 100 | 100 | 91  | RSK1(Kin.Dom.1-N-term.)    | 97  | 100 | 97  | 100 |
| PHKG2                 | 82  | 100 | 100 | 95  | RSK1(Kin.Dom.2-C-term.)    | 100 | 100 | 100 | 100 |
| PIK3C2B               | 27  | 100 | 100 | 78  | RSK2(Kin.Dom.1-N-term.)    | 58  | 90  | 77  | 66  |
| PIK3C2G               | 100 | 100 | 62  | 58  | RSK2(Kin.Dom.2-C-term.)    | 98  | 96  | 88  | 79  |
| PIK3CA                | 100 | 100 | 100 | 76  | RSK3(Kin.Dom.1-N-term.)    | 100 | 100 | 100 | 97  |
| PIK3CA(C420R)         | 100 | 100 | 100 | 89  | RSK3(Kin.Dom.2-C-term.)    | 100 | 93  | 100 | 98  |
| PIK3CA(E542K)         | 89  | 0.7 | 100 | 91  | RSK4(Kin.Dom.1-N-term.)    | 82  | 91  | 100 | 95  |
| PIK3CA(E545A)         | 96  | 100 | 100 | 98  | RSK4(Kin.Dom.2-C-term.)    | 100 | 95  | 100 | 93  |
| PIK3CA(E545K)         | 51  | 85  | 99  | 82  | S6K1                       | 83  | 98  | 100 | 95  |
| PIK3CA(H1047L)        | 91  | 100 | 94  | 100 | SBK1                       | 95  | 96  | 75  | 48  |
| PIK3CA(H1047Y)        | 100 | 100 | 70  | 55  | SGK                        | 69  | 100 | 83  | 99  |

|               |     |     |     |     |                                 |     |     |     |     |
|---------------|-----|-----|-----|-----|---------------------------------|-----|-----|-----|-----|
| <i>Sgk110</i> | 59  | 96  | 100 | 99  | <i>TRKA</i>                     | 12  | 67  | 29  | 3.4 |
| <i>SGK2</i>   | 70  | 100 | 71  | 71  | <i>TRKB</i>                     | 22  | 96  | 92  | 18  |
| <i>SGK3</i>   | 52  | 98  | 100 | 74  | <i>TRKC</i>                     | 9.5 | 79  | 100 | 10  |
| <i>SIK</i>    | 71  | 98  | 93  | 99  | <i>TRPM6</i>                    | 88  | 79  | 100 | 98  |
| <i>SIK2</i>   | 100 | 100 | 100 | 100 | <i>TSSK1B</i>                   | 100 | 100 | 100 | 92  |
| <i>SLK</i>    | 83  | 87  | 99  | 100 | <i>TSSK3</i>                    | 91  | 100 | 100 | 99  |
| <i>SNARK</i>  | 100 | 100 | 100 | 93  | <i>TTK</i>                      | 97  | 53  | 98  | 100 |
| <i>SNRK</i>   | 99  | 77  | 100 | 95  | <i>TXK</i>                      | 98  | 95  | 94  | 98  |
| <i>SRC</i>    | 90  | 100 | 89  | 91  | <i>TYK2(JH1domain-cat.)</i>     | 86  | 98  | 100 | 97  |
| <i>SRMS</i>   | 72  | 100 | 87  | 69  | <i>TYK2(JH2domain-pseudok.)</i> | 80  | 79  | 98  | 30  |
| <i>SRPK1</i>  | 92  | 100 | 100 | 86  | <i>TYRO3</i>                    | 86  | 100 | 100 | 100 |
| <i>SRPK2</i>  | 100 | 98  | 68  | 64  | <i>ULK1</i>                     | 94  | 100 | 98  | 80  |
| <i>SRPK3</i>  | 100 | 100 | 100 | 100 | <i>ULK2</i>                     | 97  | 100 | 98  | 97  |
| <i>STK16</i>  | 87  | 100 | 100 | 100 | <i>ULK3</i>                     | 96  | 83  | 100 | 100 |
| <i>STK33</i>  | 83  | 64  | 97  | 96  | <i>VEGFR2</i>                   | 59  | 100 | 100 | 80  |
| <i>STK35</i>  | 100 | 100 | 100 | 100 | <i>VPS34</i>                    | 100 | 87  | 96  | 99  |
| <i>STK36</i>  | 78  | 90  | 97  | 91  | <i>VRK2</i>                     | 26  | 100 | 94  | 78  |
| <i>STK39</i>  | 97  | 100 | 83  | 68  | <i>WEE1</i>                     | 85  | 100 | 100 | 100 |
| <i>SYK</i>    | 68  | 81  | 96  | 100 | <i>WEE2</i>                     | 86  | 100 | 100 | 100 |
| <i>TAK1</i>   | 94  | 88  | 99  | 43  | <i>WNK1</i>                     | 98  | 100 | 99  | 100 |
| <i>TAOK1</i>  | 100 | 100 | 96  | 88  | <i>WNK2</i>                     | 75  | 79  | 96  | 81  |
| <i>TAOK2</i>  | 68  | 74  | 87  | 76  | <i>WNK3</i>                     | 100 | 90  | 100 | 97  |
| <i>TAOK3</i>  | 100 | 100 | 93  | 84  | <i>WNK4</i>                     | 100 | 74  | 88  | 94  |
| <i>TBK1</i>   | 62  | 100 | 100 | 91  | <i>YANK1</i>                    | 28  | 94  | 96  | 67  |
| <i>TEC</i>    | 100 | 100 | 100 | 97  | <i>YANK2</i>                    | 11  | 100 | 92  | 63  |
| <i>TESK1</i>  | 15  | 100 | 97  | 99  | <i>YANK3</i>                    | 83  | 96  | 100 | 98  |
| <i>TGFBP1</i> | 100 | 91  | 89  | 88  | <i>YES</i>                      | 83  | 100 | 100 | 95  |
| <i>TGFBP2</i> | 100 | 100 | 100 | 100 | <i>YSK1</i>                     | 42  | 100 | 86  | 97  |
| <i>TIE1</i>   | 86  | 66  | 100 | 64  | <i>YSK4</i>                     | 18  | 100 | 95  | 55  |
| <i>TIE2</i>   | 14  | 100 | 100 | 65  | <i>ZAK</i>                      | 96  | 100 | 97  | 100 |
| <i>TLK1</i>   | 100 | 80  | 100 | 99  | <i>ZAP70</i>                    | 95  | 100 | 93  | 85  |
| <i>TLK2</i>   | 39  | 100 | 92  | 100 |                                 |     |     |     |     |
| <i>TNIK</i>   | 56  | 94  | 100 | 93  |                                 |     |     |     |     |
| <i>TNK1</i>   | 97  | 78  | 100 | 82  |                                 |     |     |     |     |
| <i>TNK2</i>   | 99  | 100 | 100 | 100 |                                 |     |     |     |     |
| <i>TNNI3K</i> | 100 | 100 | 90  | 69  |                                 |     |     |     |     |

**Supplemental Table S3.** Potency of Cmpd **26** against four ISR kinases and two FLT3 isoforms. Compound binding evaluated in cell-free biochemical kinase assays. IC<sub>50</sub> values determined based on 11-point 3-fold dilution series of **26** ranging from 10  $\mu$ M to 0.17 nM.

| Compound  | GCN2        | HRI         | PERK   | PKR         | FLT3        | FLT3 (D835Y) |
|-----------|-------------|-------------|--------|-------------|-------------|--------------|
| <b>26</b> | >10 $\mu$ M | >10 $\mu$ M | 4.7 nM | >10 $\mu$ M | >10 $\mu$ M | 1.66 $\mu$ M |



## 4. Materials and Methods

### Kinetic Solubility

Verapamil hydrochloride and tamoxifen were obtained from Sigma-Aldrich. All solvents were obtained from commercial sources and used without further purification. Hydrophilic PVDF 96-well filter plates (0.45 mm), 2 mL 96-well assay block, and 96-well UV plates were purchased from Fisher Scientific. Test compound was prepared as a 10 mM stock solution in DMSO. Aqueous suspensions of test compound at 100  $\mu$ M were prepared in assay buffers. The composition of phosphate buffered saline (PBS) is 0.1 M sodium phosphate, and 0.15 M sodium chloride, adjusted to pH 7.4. The suspensions were agitated at 200 rpm for 1 hour at 25 °C. The suspensions were transferred to a 0.45  $\mu$ m hydrophilic PVDF 96-well filter plate mounted on a fresh 2 mL 96-well plate and were filtered by centrifugation at 3,000 rpm for 1 min. 150  $\mu$ L of filtrates were transferred to 96-well UV plate for absorbance measurement. In order to determine the optimal wavelength for detection ( $\lambda_{\text{max}}$ ), the absorbance spectrum of the DMSO stock solution for each compound was recorded over a broad range of wavelengths (260–450 nm) using a UV/VIS plate reader (Molecular Devices Spectramax i3). To prepare calibration curves, a 1:1 serial dilution was performed on each compound starting at 100  $\mu$ M to generate calibration solutions with concentrations ranging from 1.25  $\mu$ M to 100  $\mu$ M. The UV absorbance of calibrants was measured at  $\lambda_{\text{max}}$  for each compound. Concentration of each compound in the assay solution was calculated using the corresponding calibration curve. All assay measurements were performed in duplicate.

### Plasma Protein Binding

Pooled mixed gender human donor plasma, Sprague Dawley male rat plasma, CD-1 (ICR) male mouse plasma and male beagle dog plasma were obtained from Bioreclamation Inc. (Westbury, NY). Reusable Teflon base plate, RED Device inserts, and BupH Phosphate Buffered Saline packs (0.1 M sodium phosphate and 0.15 M sodium chloride when dissolved in 0.5 L water) were obtained from Thermo Scientific (Waltham, MA). Propranolol was obtained from Sigma-Aldrich (St. Louis, MO). All solvents were obtained from commercial sources and used without further purification. Frozen plasma was thawed and the pH of plasma and BupH phosphate buffered saline was adjusted to 7.4 prior to dialysis. Into each well of a reusable Teflon 48-well base plate a RED insert was placed open end up. Ten microliters (10  $\mu$ L) of the test compound (0.1 mM in acetonitrile/water, 1:1 v/v) was added to 990  $\mu$ L of plasma to achieve 1  $\mu$ M final concentration. The spiked plasma (200  $\mu$ L) was added to the sample chamber, which is indicated by the red retainer ring (donor side). To the other side (receiver side), 350  $\mu$ L of BupH phosphate buffered saline (pH 7.4) was added. A buffer-to-buffer assay was also performed to measure equilibrium across the membrane in the absence of plasma protein. Propranolol was used as a positive control. All samples were prepared in triplicate. The RED device base plate was then sealed and placed in a shaking incubator set to maintain 37°C and 200 rpm for four hours.

After incubation, 100  $\mu$ L of each sample was combined with an equal volume of either plasma or buffer, to create a similar matrix for all samples. Blank buffer was added to plasma samples, and vice versa. Samples from the incubation, along with the original compound-spiked plasma samples, were prepared for analysis in the same manner. Protein precipitation by addition of two parts of ice-cold acetonitrile to one part of reaction volume was carried out. To ensure complete protein precipitation samples were sealed and placed overnight at 4°C. The next morning samples were centrifuged at 3,600 rpm for 15 minutes. The supernatants (70  $\mu$ L) were supplemented with an equal volume of internal standard solution (0.15  $\mu$ M verapamil in water) and subjected to LC-MS/MS analysis.

*LC-MS/MS Analysis using the AB Sciex 4500 QTRAP mass spectrometer*

Liquid chromatography:

Column: Waters Atlantis T3, 2.1 x 50 mm, 3 µM  
Mobile Phase A: Water with 0.1% formic acid  
Mobile Phase B: Acetonitrile with 0.1% formic acid  
Flow Rate: 0.6 mL/minute

Gradient Program

| Time (min) | % A  | % B |
|------------|------|-----|
| 0.20       | 95   | 5.0 |
| 1.00       | 5.0  | 95  |
| 1.99       | 5.0  | 95  |
| 2.00       | 95   | 5.0 |
| 3.00       | Stop |     |

Total Run Time: 3.015 minutes  
Autosampler: 10 µL injection volume  
Autosampler Wash: A: 90% water, 10 % methanol; B: 90% methanol, 10% water

Mass spectrometer:

Instrument: AB SCIEX API 4500 Qtrap  
Interface: Turbo Ionspray  
Mode: Multiple Reaction Monitoring (Negative ion mode)  
Method: 3.015 minute duration

Mass Spectrometer Settings

| IS   | TEM | CAD    | CUR | GS1 | GS2 |
|------|-----|--------|-----|-----|-----|
| 4000 | 650 | Medium | 25  | 70  | 75  |

MS/MS Parameters

| Compound    | Precursor Ion (m/z) | Product Ion (m/z) | Dwell Time (ms) | EP | CE | CXP | DP |
|-------------|---------------------|-------------------|-----------------|----|----|-----|----|
| Propranolol | 260.129             | 116.1             | 150             | 10 | 25 | 10  | 56 |
| Tolbutamide | 271.073             | 90.9              | 50              | 10 | 49 | 4   | 76 |

*Data Analysis and Calculations*

The data reported is percent plasma protein binding (% PPB), which is obtained from the calculated fraction unbound ( $f_u$ ):

$$f_u = \frac{\text{compound/IS area ratio}_{\text{buffer}}}{\text{compound/IS area ratio}_{\text{plasma}}}$$

$$\% \text{ PPB} = 100 - (f_u \times 100)$$

## P-gp Substrate Assessment using Caco-2 Monolayers

Caco-2 cells (clone C2BBel) were obtained from American Type Culture Collection (Manassas, VA). Hanks' balanced salt solution, valspodar and lucifer yellow were obtained from Sigma-Aldrich (St. Louis, MO). All solvents were obtained from commercial sources and used without further purification. Cell monolayers were grown to confluence on collagen-coated, microporous membranes in 12-well assay plates. Details of the plates and their certification are shown below. The permeability assay buffer was Hanks' balanced salt solution (HBSS) containing 10 mM HEPES and 15 mM glucose at a pH of 7.4. The buffer in the receiver chamber also contained 1% bovine serum albumin. The dosing solution concentration was 5  $\mu$ M of test article in the assay buffer +/- 1  $\mu$ M valspodar. Cells were first pre-incubated for 30 minutes with HBSS containing +/- 1  $\mu$ M valspodar. Cell monolayers were dosed on the apical side (A-to-B) or basolateral side (B-to-A) and incubated at 37°C with 5% CO<sub>2</sub> in a humidified incubator. Samples were taken from the donor and receiver chambers at 120 minutes. Each determination was performed in duplicate. The flux of lucifer yellow was also measured post-experimentally for each monolayer to ensure no damage was inflicted to the cell monolayers during the flux period. All samples were assayed by LC-MS/MS using electrospray ionization.

### *LC-MS/MS Analysis using the PE Sciex API 4000 mass spectrometer*

#### Liquid chromatography:

Column: Waters ACQUITY UPLC BEH Phenyl 30  $\times$  2.1 mm, 1.7  $\mu$ m  
Mobile Phase Buffer: 25 mM ammonium formate buffer, pH 3.5  
Aqueous Reservoir (A): 90% water, 10% buffer  
Organic Reservoir (B): 90% acetonitrile, 10% buffer  
Flow Rate: 0.7 mL/minute

#### Gradient Program

| Time (min) | % A | % B |
|------------|-----|-----|
| 0.00       | 99  | 1.0 |
| 0.65       | 1.0 | 99  |
| 0.75       | 1.0 | 99  |
| 0.80       | 99  | 1.0 |
| 1.00       | 99  | 1.0 |

Total Run Time: 1.00 minute  
Autosampler: 10  $\mu$ L injection volume  
Wash1: water/methanol/2-propanol:1/1/1; with 0.2% formic acid  
Wash2: 0.1% formic acid in water

#### Mass spectrometer:

Instrument: PE SCIEX API 4000  
Interface: Turbo Ionspray  
Mode: Multiple Reaction Monitoring (Negative ion mode)  
Method: 1.0 minute duration

#### Mass Spectrometer Settings

| IS   | TEM | CAD | CUR | GS1 | GS2 |
|------|-----|-----|-----|-----|-----|
| 5500 | 500 | 7   | 30  | 50  | 5   |

### *Data Analysis and Calculations*

The apparent permeability ( $P_{app}$ ) and percent recovery were calculated as follows:

$$P_{app} = (dC_r/dt) \times V_r / (A \times C_A)$$

$$\text{Percent recovery} = 100 \times \left( (V_r \times C_r^{final}) + (V_d \times C_d^{final}) \right) / (V_d \times C_N)$$

Where,

$dC_r/dt$  is the slope of the cumulative receiver concentration versus time in  $\mu\text{M s}^{-1}$ ;

$V_r$  is the volume of the receiver compartment in  $\text{cm}^3$ ;

$V_d$  is the volume of the donor compartment in  $\text{cm}^3$ ;

$A$  is the area of the insert ( $1.13 \text{ cm}^2$  for 12-well);

$C_A$  is the average of the nominal dosing concentration and the measured 120 minute donor concentration in  $\mu\text{M}$ ;

$C_N$  is the nominal concentration of the dosing solution in  $\mu\text{M}$ ;

$C_r^{final}$  is the cumulative receiver concentration in  $\mu\text{M}$  at the end of the incubation period;

$C_d^{final}$  is the concentration of the donor in  $\mu\text{M}$  at the end of the incubation period.

Efflux ratio (ER) is defined as Papp (B-to-A) / Papp (A-to-B).

### Metabolic Clearance in Hepatocytes

Testosterone was obtained from Cerilliant (Round Rock, TX). 7-Hydroxycoumarin was obtained from Sigma-Aldrich (St. Louis, MO). Ten-donor male pooled cryopreserved human hepatocytes, cryopreserved male Sprague Dawley rat hepatocytes, cryopreserved male ICR/CD-1 mouse hepatocytes, cryopreserved male beagle dog hepatocytes, *In Vitro*Gro HI Medium (Incubation), and *In Vitro*Gro HT Medium (Thawing) were obtained from Bioreclamation IVT (Baltimore, MD). All solvents were obtained from commercial sources and used without further purification. Test compound was prepared as a 1 mM stock solution in DMSO. A 2  $\mu\text{M}$  solution of test compound and testosterone was prepared (7-hydroxycoumarin was prepared at 20  $\mu\text{M}$ ) in *In Vitro*Gro HI Medium (Incubation). These solutions were placed in a sterile incubator set to maintain 37°C, 5%  $\text{CO}_2$ , and 98% humidity to pre-warm. Cryopreserved hepatocytes were prepared at a concentration of  $2 \times 10^6$  living cells/mL in incubation media and placed in the incubator to pre-warm. The compound solutions and hepatocyte mixtures were then combined at a ratio of 1:1 (v:v). The final volume of the reaction mixture was 750  $\mu\text{L}$ , containing 1  $\mu\text{M}$  test compound and  $1 \times 10^6$  cells/mL. The reaction mixture was placed in the incubator on a plate shaker. After 0, 15, 30, 60, 90, and 120 minutes of incubation, 100  $\mu\text{L}$  of reaction mixtures were removed from the incubation plate and mixed with 150  $\mu\text{L}$  of ice-cold acetonitrile in a designated well of a 96-well crash plate. The 96-well crash plate was placed on ice for 15 min, and samples were centrifuged (3,600 rpm, 10 min, 4 °C) to precipitate protein. The supernatants were diluted 1:1 (v/v) with water containing tolbutamide, (internal standard for positive and negative modes, respectively) in a 96-well shallow injection plate. This plate was sealed for LC-MS analysis. All measurements were done in duplicate.

## LC-MS Analysis

### Liquid chromatography:

Column: Waters Atlantis T3, 2.1 × 50 mm x 5 mm

Mobile Phase A: Water with 0.1% formic acid

Mobile Phase B: Acetonitrile with 0.1% formic acid

Flow Rate: 0.7 mL/minute

#### Gradient Program

| Time (min) | % A | % B |
|------------|-----|-----|
| 0.00       | 90  | 10  |
| 0.40       | 90  | 10  |
| 1.20       | 10  | 90  |
| 2.00       | 10  | 90  |
| 2.01       | 90  | 10  |
| 3.00       | 90  | 10  |

Total Run Time: 3 minutes

Autosampler: 10 µL injection volume

Autosampler Wash: A: 90% water, 10 % acetonitrile; B: 90% acetonitrile, 10% water

#### Mass spectrometer:

Instrument: AB SCIEX API 3200

Interface: Turbo Ionspray

Mode: Q1

Method: 3.0 minute duration

#### Mass Spectrometer Settings

| IS    | TEM | CUR |
|-------|-----|-----|
| -4500 | 500 | 25  |

#### MS Parameters

| Compound          | Polarity | Q <sub>1</sub> Mass | Dwell Time | DP  | EP |
|-------------------|----------|---------------------|------------|-----|----|
| Testosterone      | +        | 289                 | 150        | 70  | 10 |
| 7-Hydroxycoumarin | +        | 163.2               | 150        | 70  | 10 |
| Tolbutamide       | -        | 269.3               | 150        | -70 | 10 |

## Data Analysis and Calculations

### Calculation of *in vivo* hepatic clearance

*In vivo* hepatic clearance  $CL_H$  was calculated using the well stirred liver model according to the following equation:

$$CL_H = \frac{Q_H \cdot f_u \cdot CL'_{int}}{Q_H + f_u \cdot CL'_{int}}$$

where  $Q_H$  is the total liver blood flow,  $f_u$  is unbound fraction of the drug, and  $CL'_{int}$  is defined as follows:

$$CL'_{int} = CL_{int} \times (10^6 \text{ cells/g of liver weight}) \times (\text{g liver weight/kg of body weight})$$

In the first approximation, used in this study,  $f_u = 1$ .

Hepatic extraction ratio  $E_H$  was calculated using the following equation:

$$E_H = \frac{CL_H}{Q_H}$$

Physiological Parameters of Mammalian Species Used for Calculation of Hepatic Clearance:

| Species | g liver wt/kg body wt | 10 <sup>6</sup> cells/g liver wt | Q <sub>H</sub> , mL/min/kg body wt |
|---------|-----------------------|----------------------------------|------------------------------------|
| Human   | 26                    | 99                               | 21                                 |
| Rat     | 37                    | 128                              | 68                                 |
| Dog     | 33                    | 188                              | 31                                 |
| Mouse   | 55                    | 128                              | 120                                |

### PERK Crystallization and Structure Determination

Human PERK (575-1094 Δ670-874) was purified as described previously (2). Purified PERK protein at 11.3 mg/ml was mixed with 10 mM **26** (in DMSO) to a final protein-inhibitor molar ratio 1:2. The PERK-**26** mixture was incubated on ice for 2 hours. The crystal for the data collection was grown at 20 °C in a sitting drop by combining 2.0 μl PERK1/ **26** mixture, 2.0 μl reservoir solution (12% PEG3350, 4% tacsimate pH7.0), and 0.4 μl seed stock which was equilibrated over a 500 μl reservoir solution. The crystal was grown to 0.2 x 0.2 mm over a three-week period before harvesting for analysis. The crystal was transferred stepwise to a cryo-solution with 12% PEG3350, 4% tacsimate, pH7.0, 250mM NaCl, 20% glycerol before being frozen in liquid nitrogen.

Diffraction data was collected at the GMCA-CAT beamline 23IDD at the Advanced Photon Source at Argonne National Laboratory using a Pilatus 6M detector. The data set was collected from a single crystal at 1.03322Å (12000 eV) wavelength for 180° in 900 images. The diffraction images were processed with DIALS (3) and scaled with AIMLESS (4). The structure was solved by molecular replacement using PDB 4X7J (5) as starting model by Phaser (6). The structure was manually built using Coot (7) and subsequently refined using Refmac5 (8). The crystallographic figures were generated by CCP4MG (9), and the statistics of data collection and refinement are summarized in Supplemental Table S1.

### Cell lines

MV-4-11 cells (ATCC CRL-9591) were grown in Iscove's Modified Dulbecco's Medium (Gibco 12440-053) with 10% Dialyzed FBS (Gibco 26400-044). EoL-1 cells (ECACC 94042252) were grown in RPMI (Gibco 11875-093) with 10% Dialyzed FBS (Gibco 26400-044).

### In vitro kinase activity assay

Flt3 (h) and Flt3(D835Y) are incubated with 8 mM MOPS pH 7.0, 0.2 mM EDTA, 50 μM EAIYAAPFAKKK, 10 mM Magnesium acetate and [γ-33P]-ATP (specific activity and concentration as required). The reaction is initiated by the addition of the Mg/ATP mix. After incubation for 40 minutes at room temperature, the reaction is stopped by the addition of phosphoric acid to a concentration of 0.5%. An aliquot of the reaction is then spotted onto a filter and washed four times for 4 minutes in 0.425% phosphoric acid and once in methanol prior to drying and scintillation counting.

### Cell viability assay

MV-4-11 and EoL-1 were plated at a density 20,000 cells/well in a 96 well plate. Cells were incubated with DMSO, 1  $\mu$ M docetaxel, or an 8-pt, 2-fold dose response of **26** in quadruplicate. On day 3 and day 7, cells from DMSO-treated wells were counted and cells from all wells were split back so that the DMSO-treated wells matched the original seeding density. Cells were centrifuged in 96 well filter plates (Sigma) and resuspended in fresh compound-containing media. On day 10, cells were incubated with alamarBlue™ HS Cell Viability Reagent (Invitrogen) (10  $\mu$ L of alamarBlue in a well of 90  $\mu$ L media) for 2 hours at 37C/5% CO<sub>2</sub>. Fluorescence was measured on the EnVision Plate reader (Perkin Elmer) at an ex/em of 560/590 nm. Raw fluorescence values were normalized to positive and negative controls (DMSO, 1  $\mu$ M docetaxel) to get a % viability. Replicates were averaged and dose responses were plotted on a 4 Parameter Logistic Model using XLfit.

### Western blot analysis

MV-4-11 cells were plated in 6 well plates overnight in reduced serum media (IMDM + 0.5% FBS). The following day, compound or vehicle were added to the plate for a final DMSO concentration of 0.1% and incubated at 37 C for 2 hours. Cells were washed with 1X PBS (Gibco 10010-023), and lysed in RIPA buffer with added inhibitors. Protein concentration was determined using a BCA assay (Thermo Scientific 23225). Lysate was then combined with Bolt LDS Sample Buffer and reducing agent (Thermo Fisher Scientific) - Samples were heated 70°C in the heat block for 10 minutes and loaded onto 12 well Bolt Bis-Tris Plus gels with 23  $\mu$ g total protein and 2.5  $\mu$ L of LiCOR Chameleon Duo Pre-stained ladder. P-STAT5 used 10% Bolt gels and p-ERK was run on 12% Bolt gels. Gels were run for 32 minutes at 200V in 1X Bolt MOPS Running Buffer (Invitrogen). Gels were transferred onto a nitrocellulose membrane (Invitrogen) using the Invitrogen Mini Blot Module and 1X Bolt Transfer Buffer with 10% methanol (Invitrogen) at 10V for 120 minutes. Membranes were stained for total protein normalization using the Revert 700 Total Protein Stain Kit (LiCOR). Membranes were blocked for 1 hour at room temperature with Intercept® (TBS) Blocking Buffer (LiCOR 927-60001) and then an overnight incubation at 4 C with primary antibody. The following day, membranes are washed 3 times with 1X TBS and incubated with secondary antibody for 1 hour at room temperature. Membranes are washed again and imaged on the LiCOR Odyssey CLx. The primary antibodies used were p-STAT5 and p-ERK from Cell Signaling. Other compounds used were Crenolanib and Gilteritinib from Medchemexpress, and Quizartinib from Tocris.

## 5. References

1. Williams CJ, Headd JJ, Moriarty NW, Prisant MG, Videau LL, Deis LN, et al. MolProbity: More and better reference data for improved all-atom structure validation. *Protein Sci.* 2018;27(1):293-315.
2. Calvo V, Surguladze D, Li AH, Surman MD, Malibhatla S, Bandaru M, et al. Discovery of 2-amino-3-amido-5-aryl-pyridines as highly potent, orally bioavailable, and efficacious PERK kinase inhibitors. *Bioorg Med Chem Lett.* 2021;43:128058.
3. Winter G, Waterman DG, Parkhurst JM, Brewster AS, Gildea RJ, Gerstel M, et al. DIALS: implementation and evaluation of a new integration package. *Acta Crystallogr D Struct Biol.* 2018;74(Pt 2):85-97.
4. Evans PR, Murshudov GN. How good are my data and what is the resolution? *Acta Crystallogr D Biol Crystallogr.* 2013;69(Pt 7):1204-14.
5. Smith AL, Andrews KL, Beckmann H, Bellon SF, Beltran PJ, Booker S, et al. Discovery of 1H-pyrazol-3(2H)-ones as potent and selective inhibitors of protein kinase R-like endoplasmic reticulum kinase (PERK). *J Med Chem.* 2015;58(3):1426-41.
6. McCoy AJ, Grosse-Kunstleve RW, Adams PD, Winn MD, Storoni LC, Read RJ. Phaser crystallographic software. *J Appl Crystallogr.* 2007;40(Pt 4):658-74.
7. Emsley P, Lohkamp B, Scott WG, Cowtan K. Features and development of Coot. *Acta Crystallogr D Biol Crystallogr.* 2010;66(Pt 4):486-501.
8. Murshudov GN, Skubak P, Lebedev AA, Pannu NS, Steiner RA, Nicholls RA, et al. REFMAC5 for the refinement of macromolecular crystal structures. *Acta Crystallogr D Biol Crystallogr.* 2011;67(Pt 4):355-67.
9. McNicholas S, Potterton E, Wilson KS, Noble ME. Presenting your structures: the CCP4mg molecular-graphics software. *Acta Crystallogr D Biol Crystallogr.* 2011;67(Pt 4):386-94.
